# Supplementary material for: Changes in long non-coding RNA transcriptomic profiles after ischemia-reperfusion injury in rat spinal cord
Source: PeerJ journal article supplement (doi:10.7717/peerj.8293), 2020-01-06

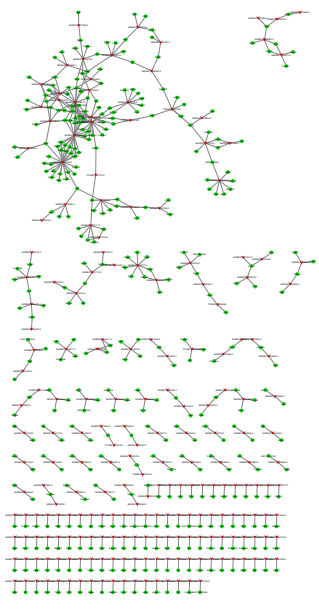

Supplement: Figure_S1.pdf [file Figure_S1.pdf]
