# Supplementary material for: Changes in long non-coding RNA transcriptomic profiles after ischemia-reperfusion injury in rat spinal cord
Source: PeerJ. 2020 Jan 6;8:e8293. doi: 10.7717/peerj.8293 (PMC6951290; doi:10.7717/peerj.8293)
Supplement: Supplemental Information 2 [file peerj-08-8293-s002.xlsx]

## Sheet: Sheet1
id	foldChange	log2FoldChange	pval	up_down	locus	length	class_code
NONRATT000043.2	7.48329	2.90367	0.0425301	Up	chr1:15104740:15106963:+	2223	Exonic
NONRATT000054.2	11.4678	3.51952	0.0474229	Up	chr1:15819455:15826248:+	543	Exonic
NONRATT000094.2	3.22901	1.69109	0.00726743	Up	chr1:22758414:22760365:+	1545	Exonic
NONRATT000102.2	0.0458404	-4.44724	0.0499162	Down	chr1:24976789:24981677:+	386	Linc
NONRATT000106.2	0.295105	-1.7607	0.00566466	Down	chr1:28160316:28161519:+	1203	Linc
NONRATT000112.2	0.172364	-2.53647	0.0114881	Down	chr1:29419591:29425235:+	256	Exonic
NONRATT000139.2	0.469136	-1.09192	0.0223366	Down	chr1:35871076:35872462:+	1386	Linc
NONRATT000147.2	5.51148	2.46244	4.88e-06	Up	chr1:39675314:39676020:+	706	Linc
NONRATT000185.2	4.76869	2.25359	0.0460264	Up	chr1:48879687:48905124:-	742	Exonic
NONRATT000198.2	0.167061	-2.58155	0.0137601	Down	chr1:47971904:47972492:-	290	Antisense
NONRATT000217.2	3.14192	1.65165	0.00156414	Up	chr1:53929119:53931728:+	2609	Linc
NONRATT000247.2	9.08359	3.18326	0.0041173	Up	chr1:59145190:59146455:+	362	Exonic
NONRATT000319.2	0.26749	-1.90244	0.000167651	Down	chr1:70210842:70223097:+	381	Exonic
NONRATT000346.2	58.5992	5.87281	7.92e-08	Up	chr1:73393936:73396095:-	890	Exonic
NONRATT000382.2	0.0929556	-3.42731	0.000323188	Down	chr1:78388539:78390911:+	2372	Linc
NONRATT000390.2	0.289952	-1.78611	0.000587101	Down	chr1:78811780:78812484:+	704	Exonic
NONRATT000393.2	15.3796	3.94295	0.0486489	Up	chr1:78833275:78835501:+	593	Exonic
NONRATT000394.2	58.6047	5.87294	0.00543605	Up	chr1:78836767:78837275:+	508	Linc
NONRATT000396.2	0.422176	-1.24408	0.0105448	Down	chr1:78879326:78880377:+	1051	Linc
NONRATT000399.2	0.416411	-1.26392	0.0245335	Down	chr1:78924790:78925483:+	693	Linc
NONRATT000400.2	0.387322	-1.3684	0.00854625	Down	chr1:78925572:78926797:+	1225	Linc
NONRATT000429.2	0	#NAME?	0.00671975	Down	chr1:80113940:80114540:+	426	Exonic
NONRATT000479.2	Inf	Inf	0.00104857	Up	chr1:81795948:81797237:+	898	Exonic
NONRATT000508.2	12.4839	3.642	6.88e-06	Up	chr1:84054982:84055734:+	752	Exonic
NONRATT000539.2	31.5278	4.97855	0.0111647	Up	chr1:85437779:85438753:+	475	Exonic
NONRATT000555.2	54.7129	5.77381	0.00899917	Up	chr1:86877724:86878707:+	983	Exonic
NONRATT000559.2	4.26159	2.09139	0.0058684	Up	chr1:87002252:87003583:+	1220	Exonic
NONRATT000579.2	4.66762	2.22269	0.0146289	Up	chr1:88875446:88879305:+	669	Exonic
NONRATT000605.2	0.0664092	-3.91247	0.00201083	Down	chr1:91445847:91446357:+	423	Exonic
NONRATT000711.2	3.42957	1.77803	0.00185378	Up	chr1:101700927:101703550:+	2623	Exonic
NONRATT000733.2	10.8978	3.44596	0.0260145	Up	chr1:104831111:104831802:+	691	Sense No Exonic
NONRATT000744.2	0.359039	-1.47779	0.00464601	Down	chr1:113266539:113267432:+	893	Linc
NONRATT000745.2	0.381585	-1.38992	0.00542107	Down	chr1:113267529:113268938:+	1409	Linc
NONRATT000757.2	3.3307	1.73583	0.00303182	Up	chr1:114705239:114705757:+	518	Sense No Exonic
NONRATT000761.2	0.0144143	-6.11636	0.00982552	Down	chr1:116676697:116677607:+	910	Exonic
NONRATT000775.2	0.426095	-1.23075	0.0337399	Down	chr1:126566418:126574292:+	903	Exonic
NONRATT000776.2	0.425607	-1.23241	0.0365805	Down	chr1:126586551:126588395:+	268	Exonic
NONRATT000803.2	0.404775	-1.30481	0.041259	Down	chr1:135140680:135142963:+	2283	Linc
NONRATT000808.2	9.37245	3.22843	1.57e-05	Up	chr1:137239745:137257406:+	688	Exonic
NONRATT000813.2	2.38851	1.25611	0.00764264	Up	chr1:137439500:137440570:+	1070	Linc
NONRATT000814.2	2.87212	1.52212	0.00407134	Up	chr1:137443003:137444757:+	1754	Linc
NONRATT000886.2	0	#NAME?	0.0086367	Down	chrX:153066790:153067495:+	705	Exonic
NONRATT000898.2	4.975	2.3147	0.0191783	Up	chrX:156486039:156486988:+	949	Exonic
NONRATT000954.2	0.147982	-2.75651	0.000224338	Down	chr1:157271416:157274230:+	2814	Linc
NONRATT000994.2	0.446918	-1.16192	0.0293731	Down	chr1:164573195:164574562:+	1367	Linc
NONRATT001043.2	0.457225	-1.12902	0.0334073	Down	chr1:166871056:166871827:+	771	Linc
NONRATT001130.2	9.55846	3.25678	0.00389619	Up	chr1:185528478:185529391:+	913	Linc
NONRATT001131.2	14.5944	3.86734	0.00493694	Up	chr1:185538648:185539623:+	975	Linc
NONRATT001153.2	0.396406	-1.33495	0.0338438	Down	chr1:190675015:190675743:+	728	Linc
NONRATT001221.2	0.0705375	-3.82546	1.42e-05	Down	chr1:198802981:198803546:+	565	Linc
NONRATT001282.2	3.57539	1.8381	0.0101987	Up	chr1:203102237:203103386:+	1149	Linc
NONRATT001325.2	0.359219	-1.47706	0.0122437	Down	chr1:212169811:212176903:+	828	Linc
NONRATT001368.2	10.08	3.33342	7.22e-05	Up	chr1:215660362:215662507:+	2145	Exonic
NONRATT001407.2	0.211468	-2.24149	0.0330228	Down	chr1:219349632:219351443:+	411	Exonic
NONRATT001412.2	Inf	Inf	5.37e-06	Up	chr1:219468743:219469331:+	588	Exonic
NONRATT001418.2	0.0178186	-5.81047	0.00908247	Down	chr1:220005348:220007158:+	1810	Linc
NONRATT001430.2	Inf	Inf	0.000494124	Up	chr1:220749976:220750341:+	365	Exonic
NONRATT001432.2	303.248	8.24435	1.07e-07	Up	chr1:220835102:220836600:+	1498	Linc
NONRATT001474.2	8.76009	3.13095	0.0350038	Up	chr1:221746591:221747374:+	668	Exonic
NONRATT001499.2	4.51845	2.17583	0.00166265	Up	chr1:224921323:224923782:+	1214	Linc
NONRATT001500.2	11.4967	3.52314	0.00551864	Up	chr1:224921331:224923228:+	1176	Linc
NONRATT001501.2	3.11889	1.64103	0.00128705	Up	chr1:224921785:224923202:+	727	Linc
NONRATT001502.2	2.17278	1.11954	0.0372796	Up	chr1:224921803:224924000:+	749	Linc
NONRATT001513.2	5.52083	2.46488	0.0426561	Up	chr1:225071081:225071943:+	687	Exonic
NONRATT001566.2	3.98812	1.99571	0.00402013	Up	chr1:228364720:228369765:+	2254	Exonic
NONRATT001608.2	0.447852	-1.15891	0.0207646	Down	chr1:240758929:240760598:+	1669	Linc
NONRATT001609.2	0.374218	-1.41805	0.0184208	Down	chr1:240761511:240762558:+	1047	Linc
NONRATT001620.2	0.432061	-1.21069	0.0145398	Down	chr1:241797527:241799456:+	1929	Linc
NONRATT001665.2	3.07367	1.61996	0.0107503	Up	chr1:248134671:248141231:+	599	Exonic
NONRATT001710.2	0.253358	-1.98075	0.00014088	Down	chr1:256997890:256999241:+	1351	Linc
NONRATT001746.2	0.408688	-1.29093	0.0100476	Down	chr1:261514505:261516219:+	1714	Linc
NONRATT001771.2	0.261959	-1.93259	0.0492371	Down	chr1:264826620:264827350:+	730	Linc
NONRATT001852.2	Inf	Inf	0.000361458	Up	chr1:268881990:268882543:+	553	Linc
NONRATT001857.2	5.29201	2.40381	0.00217041	Up	chr1:273145396:273146088:+	692	Linc
NONRATT001866.2	Inf	Inf	0.0280842	Up	chr1:274247879:274248399:+	520	Sense No Exonic
NONRATT001868.2	21.3657	4.41722	0.00317586	Up	chr1:274256328:274257196:+	868	Exonic
NONRATT001917.2	4.55934	2.18882	0.0244609	Up	chr1:237487:237792:-	305	Antisense
NONRATT001929.2	6.00975	2.5873	0.00893054	Up	chr1:1885534:1885931:-	397	Antisense
NONRATT001934.2	Inf	Inf	0.0370578	Up	chr1:2784228:2785942:-	1714	Antisense
NONRATT001969.2	0.487922	-1.03528	0.0372767	Down	chr1:13832309:13837236:-	4927	Linc
NONRATT002026.2	0	#NAME?	0.0473947	Down	chr1:28570094:28579813:-	830	Antisense
NONRATT002082.2	0.233711	-2.0972	0.0192241	Down	chr1:37977333:37977824:-	491	Linc
NONRATT002086.2	5.58977	2.48279	0.0291364	Up	chr1:37980559:37981228:-	644	Linc
NONRATT002098.2	0.335341	-1.5763	0.00184269	Down	chr1:41608639:41619824:-	952	Linc
NONRATT002109.2	0.467894	-1.09575	0.0364594	Down	chr1:42487391:42488547:-	1156	Linc
NONRATT002139.2	0.0716448	-3.80299	0.00651559	Down	chr1:48773363:48784003:+	682	Antisense
NONRATT002229.2	0.32535	-1.61994	0.0326648	Down	chr1:62232718:62233264:-	546	Linc
NONRATT002234.2	0	#NAME?	1.47e-05	Down	chr1:62541251:62575718:-	264	Exonic
NONRATT002259.2	128.096	7.00108	0.00973981	Up	chr1:63683471:63684201:-	730	Exonic
NONRATT002333.2	0.391959	-1.35123	0.00422027	Down	chr1:78843077:78844692:-	1615	Exonic
NONRATT002336.2	0.0723081	-3.7897	0.0185158	Down	chr1:79114650:79114979:-	294	Linc
NONRATT002352.2	2.63031	1.39523	0.0310262	Up	chr1:80171555:80175285:-	648	Exonic
NONRATT002354.2	11.9083	3.5739	1.42e-09	Up	chr1:80214468:80215287:-	819	Exonic
NONRATT002372.2	29.8353	4.89895	0.0151034	Up	chr1:80730796:80733423:-	617	Exonic
NONRATT002411.2	0.328508	-1.606	0.0074721	Down	chr1:82463826:82469481:-	658	Linc
NONRATT002413.2	0.0447587	-4.48169	0.0113593	Down	chr1:82467506:82468267:-	761	Linc
NONRATT002420.2	11.5515	3.53001	0.0184485	Up	chr1:82554982:82555536:-	554	Exonic
NONRATT002459.2	6.17735	2.62699	0.000146044	Up	chr1:85406468:85408082:-	1614	Exonic
NONRATT002462.2	0.430831	-1.2148	0.0248297	Down	chr1:85516128:85516986:-	858	Linc
NONRATT002476.2	11.0977	3.47219	0.00983451	Up	chr1:87190707:87191544:-	526	Antisense
NONRATT002529.2	6.2279	2.63875	0.048967	Up	chr1:89464850:89465516:-	666	Exonic
NONRATT002532.2	0.286517	-1.80331	0.0238335	Down	chr1:89484199:89485705:-	1243	Exonic
NONRATT002602.2	0	#NAME?	0.000486231	Down	chr1:100808627:100811904:-	643	Exonic
NONRATT002650.2	2.88709	1.52962	0.0313802	Up	chr1:101482899:101484330:-	1431	Sense No Exonic
NONRATT002654.2	14.2659	3.8345	0.043168	Up	chr1:101511906:101512391:-	485	Exonic
NONRATT002718.2	8.0848	3.01521	0.0117736	Up	chr1:114352495:114354928:-	830	Exonic
NONRATT002720.2	0.416593	-1.26329	0.00872636	Down	chr1:114381745:114384397:-	2354	Linc
NONRATT002753.2	3.4671	1.79373	0.0260609	Up	chr1:131169874:131171146:-	1272	Linc
NONRATT002788.2	0.107933	-3.2118	0.014805	Down	chr1:140737746:140740016:-	392	Linc
NONRATT002815.2	Inf	Inf	0.0160863	Up	chr1:142178572:142180043:-	469	Exonic
NONRATT002846.2	Inf	Inf	0.046817	Up	chr1:145852581:145881327:-	569	Exonic
NONRATT002859.2	0	#NAME?	0.0430754	Down	chr1:146748652:146823762:-	754	Exonic
NONRATT002898.2	0.123764	-3.01434	6.11e-06	Down	chrX:157236342:157238730:-	2388	Linc
NONRATT002921.2	5.63196	2.49364	0.00191748	Up	chr1:154270969:154272139:-	1027	Linc
NONRATT002962.2	4.09143	2.03261	0.000107099	Up	chr1:164304395:164308280:-	393	Exonic
NONRATT002975.2	0.109969	-3.18483	0.0269866	Down	chr1:165564170:165565835:-	515	Exonic
NONRATT002987.2	7.34157	2.87609	0.0160664	Up	chr1:166030061:166031345:-	1284	Exonic
NONRATT003032.2	2.8757	1.52391	0.0312548	Up	chr1:170449364:170449771:-	407	Exonic
NONRATT003040.2	2.63786	1.39937	0.0126042	Up	chr1:170574349:170576048:-	1699	Exonic
NONRATT003046.2	2.28676	1.19331	0.0158138	Up	chr1:171994350:171995362:-	1012	Linc
NONRATT003070.2	0.351007	-1.51043	0.00378586	Down	chr1:180491928:181215438:-	644	Linc
NONRATT003071.2	0.447609	-1.15969	0.0317412	Down	chr1:180644622:180644998:-	376	Linc
NONRATT003083.2	5.44575	2.44513	0.0146949	Up	chr1:187764683:187765750:-	812	Exonic
NONRATT003125.2	0.419705	-1.25255	0.0426686	Down	chr1:195061111:195062735:-	325	Linc
NONRATT003127.2	0.376267	-1.41017	0.0321108	Down	chr1:195074111:195093943:-	1304	Exonic
NONRATT003128.2	0.265717	-1.91204	0.00301836	Down	chr1:195077105:195096710:-	921	Exonic
NONRATT003131.2	0.0520067	-4.26516	0.0247577	Down	chr1:195078704:195094661:-	848	Exonic
NONRATT003136.2	0.419845	-1.25207	0.0383075	Down	chr1:195087461:195193051:-	576	Exonic
NONRATT003193.2	7.48509	2.90402	3.27e-05	Up	chr1:198461405:198462033:-	449	Exonic
NONRATT003234.2	26.4766	4.72664	0.0172507	Up	chr1:199448478:199452751:-	430	Antisense
NONRATT003256.2	4.33642	2.11651	0.0148132	Up	chr1:201071264:201082082:-	446	Exonic
NONRATT003298.2	18.5338	4.21209	0.0291282	Up	chr1:209710801:209722902:-	713	Linc
NONRATT003299.2	75.9066	6.24615	0.0178409	Up	chr1:209710803:209748949:-	952	Linc
NONRATT003313.2	0	#NAME?	0.000173449	Down	chr1:211922388:211922838:-	450	Exonic
NONRATT003316.2	Inf	Inf	1.49e-06	Up	chr1:212317490:212318079:-	589	Linc
NONRATT003317.2	11.5654	3.53174	0.0026604	Up	chr1:212319063:212320022:-	701	Linc
NONRATT003318.2	25.482	4.6714	0.0012881	Up	chr1:212320603:212323153:-	345	Linc
NONRATT003319.2	22.1493	4.46919	0.000735644	Up	chr1:212324425:212325546:-	686	Linc
NONRATT003320.2	51.3387	5.68198	2.76e-05	Up	chr1:212328054:212328500:-	446	Linc
NONRATT003337.2	3.44507	1.78453	0.0377787	Up	chr1:213750211:213750835:-	382	Exonic
NONRATT003386.2	0.44856	-1.15663	0.0381783	Down	chr1:216968004:216969509:-	1505	Linc
NONRATT003416.2	0.216963	-2.20448	0.0268682	Down	chr1:219418769:219419170:-	401	Linc
NONRATT003452.2	16.469	4.04168	5.87e-05	Up	chr1:220862473:220863476:-	516	Exonic
NONRATT003472.2	2.30756	1.20637	0.0114185	Up	chr1:221199789:221200570:-	781	Linc
NONRATT003473.2	4.52834	2.17898	2.35e-06	Up	chr1:221200982:221204272:-	3290	Linc
NONRATT003503.2	20.1898	4.33556	0.0403342	Up	chr1:222164462:222164827:-	365	Exonic
NONRATT003505.2	6.74479	2.75377	0.0134127	Up	chr1:222165385:222166498:-	777	Exonic
NONRATT003509.2	0.130007	-2.94334	0.0135173	Down	chr1:222182996:222184363:-	811	Exonic
NONRATT003517.2	0.1053	-3.24742	0.0440963	Down	chr1:222237000:222240328:-	649	Exonic
NONRATT003527.2	0.236614	-2.07939	0.0167626	Down	chr1:222468504:222468936:-	432	Exonic
NONRATT003606.2	2.44113	1.28755	0.011773	Up	chr1:229205583:229205976:-	393	Linc
NONRATT003628.2	Inf	Inf	0.00228348	Up	chr1:236676984:236679586:-	2602	Linc
NONRATT003635.2	19.7957	4.30712	0.000232577	Up	chr1:237893984:237896316:-	1471	Exonic
NONRATT003637.2	8.76568	3.13187	4.45e-06	Up	chr1:237908110:237909996:-	1886	Exonic
NONRATT003661.2	13.1523	3.71725	0.0497659	Up	chr1:241967824:241968420:-	596	Sense No Exonic
NONRATT003663.2	29.3982	4.87766	0.00425409	Up	chr1:242010630:242024407:-	313	Sense No Exonic
NONRATT003689.2	9.30675	3.21828	0.0300929	Up	chr1:246574697:246575446:-	749	Linc
NONRATT003721.2	Inf	Inf	0.00361933	Up	chr1:252817887:252819477:-	775	Exonic
NONRATT003750.2	2.64195	1.4016	0.0425797	Up	chr1:259376507:259382449:-	837	Linc
NONRATT003757.2	3.27151	1.70996	0.0497583	Up	chr1:259445350:259446336:-	986	Linc
NONRATT003759.2	3.85539	1.94688	0.0230684	Up	chr1:259466179:259467420:-	1241	Linc
NONRATT003827.2	0.334189	-1.58126	0.0329786	Down	chr1:264298657:264303041:-	1069	Exonic
NONRATT003846.2	7.45245	2.89771	0.00355076	Up	chr1:265505557:265506081:-	394	Linc
NONRATT003889.2	0.454805	-1.13668	0.0224161	Down	chr1:266859964:266866774:-	369	Exonic
NONRATT003954.2	0.474646	-1.07508	0.0271929	Down	chr1:281061381:281064127:-	2746	Linc
NONRATT003960.2	13.5111	3.75607	0.0355753	Up	chr1:281818173:281836534:-	815	Exonic
NONRATT003976.2	0.0627207	-3.99491	2.04e-06	Down	chr10:3411389:3411666:+	277	Exonic
NONRATT003984.2	4.24412	2.08546	0.0332824	Up	chr10:5083401:5099960:+	754	Linc
NONRATT003994.2	4.34453	2.1192	2.83e-05	Up	chr10:7041511:7052810:+	446	Exonic
NONRATT004036.2	0.4465	-1.16327	0.0249255	Down	chr10:730270:751058:+	1405	Exonic
NONRATT004059.2	3.34198	1.7407	0.0127908	Up	chr10:13084411:13085173:+	601	Exonic
NONRATT004079.2	0.332023	-1.59064	0.0255642	Down	chr10:13867321:13867999:+	588	Exonic
NONRATT004088.2	7.24413	2.85681	0.00404583	Up	chr10:14088181:14089332:+	905	Exonic
NONRATT004142.2	Inf	Inf	0.0116718	Up	chr10:17294917:17296453:+	1536	Linc
NONRATT004161.2	0.195441	-2.35519	0.0391295	Down	chr10:20357638:20383406:+	398	Exonic
NONRATT004185.2	4.05819	2.02084	0.0276434	Up	chr10:31004412:31006188:+	769	Linc
NONRATT004211.2	0.404231	-1.30675	0.00747238	Down	chr10:35373708:35375742:+	1601	Exonic
NONRATT004264.2	0.384478	-1.37903	0.0053078	Down	chr10:38953093:38955042:+	1949	Linc
NONRATT004272.2	0.395968	-1.33655	0.0123883	Down	chr10:39716730:39717925:+	1195	Linc
NONRATT004273.2	0.321401	-1.63755	0.000965999	Down	chr10:39718246:39719353:+	1107	Linc
NONRATT004307.2	7.44222	2.89573	0.0160602	Up	chr10:43480236:43480871:+	635	Linc
NONRATT004351.2	0.185599	-2.42974	0.0109689	Down	chr10:46240867:46243077:+	932	Exonic
NONRATT004368.2	358.479	8.48574	2.71e-05	Up	chr10:47983254:47984472:+	1218	Antisense
NONRATT004378.2	4.04214	2.01512	0.0181226	Up	chr10:48928381:48929448:+	474	Linc
NONRATT004379.2	2.79651	1.48363	0.00303153	Up	chr10:48928410:48929449:+	253	Linc
NONRATT004439.2	0.286232	-1.80474	0.0210468	Down	chr10:55925058:55925673:+	615	Exonic
NONRATT004485.2	0.130018	-2.94322	0.0169978	Down	chr10:56824151:56826480:+	865	Exonic
NONRATT004516.2	0.268219	-1.89852	0.000430312	Down	chr10:58332595:58342966:+	510	Exonic
NONRATT004553.2	4.78351	2.25807	0.00244112	Up	chr10:61755041:61756125:+	837	Linc
NONRATT004557.2	9.01783	3.17278	0.00611756	Up	chr10:62016214:62016703:+	489	Linc
NONRATT004578.2	87.8603	6.45714	0.0365618	Up	chr10:63441164:63442293:+	1129	Linc
NONRATT004651.2	4.31539	2.10949	0.0070735	Up	chr10:67773972:67783220:+	1405	Exonic
NONRATT004656.2	0.480483	-1.05744	0.0376639	Down	chr10:67864309:67865868:+	1559	Sense No Exonic
NONRATT004677.2	0.398168	-1.32855	0.0246844	Down	chr10:71850176:71860352:+	471	Linc
NONRATT004679.2	0.0113021	-6.46727	0.0122782	Down	chr10:71858906:71860354:+	440	Linc
NONRATT004685.2	Inf	Inf	0.00233291	Up	chr10:72272028:72272630:+	602	Exonic
NONRATT004687.2	Inf	Inf	0.000231786	Up	chr10:72276271:72277046:+	775	Sense No Exonic
NONRATT004721.2	0.380357	-1.39457	0.00410774	Down	chr10:74544707:74547584:-	2877	Antisense
NONRATT004732.2	Inf	Inf	0.00151945	Up	chr10:73902836:73920810:-	1144	Exonic
NONRATT004734.2	34.1969	5.09579	1.02e-18	Up	chr10:73903211:73905142:-	898	Exonic
NONRATT004764.2	Inf	Inf	0.044644	Up	chr10:82758548:82760300:+	648	Exonic
NONRATT004771.2	0.128019	-2.96557	0.00331374	Down	chr10:82814995:82816736:+	1640	Exonic
NONRATT004795.2	0.333283	-1.58518	0.0251313	Down	chr10:84123642:84124253:+	611	Linc
NONRATT004832.2	0.316344	-1.66043	0.00221908	Down	chr10:85787548:85789137:+	938	Linc
NONRATT004833.2	0.365383	-1.45252	0.0261557	Down	chr10:85789532:85789971:+	439	Linc
NONRATT004850.2	0.443856	-1.17184	0.0333741	Down	chr10:86682380:86683103:+	723	Sense No Exonic
NONRATT004851.2	0.26365	-1.9233	0.00251242	Down	chr10:86683129:86684935:+	1806	Exonic
NONRATT004883.2	2.88559	1.52887	0.0215606	Up	chr10:88769607:88780078:+	608	Exonic
NONRATT004903.2	0.0267061	-5.22669	0.000372227	Down	chr10:89167793:89168970:+	486	Exonic
NONRATT004936.2	0.325255	-1.62036	0.00431241	Down	chr10:90350207:90351170:+	963	Exonic
NONRATT004947.2	0.331048	-1.59489	0.0249269	Down	chr10:91187565:91189333:+	545	Exonic
NONRATT005045.2	0.0276223	-5.17802	0.00658451	Down	chr10:103333030:103334465:+	995	Exonic
NONRATT005050.2	3.4574	1.78969	0.0182224	Up	chr10:103448778:103451586:+	982	Exonic
NONRATT005067.2	0.352423	-1.50462	0.0401904	Down	chr10:104201938:104253422:-	308	Exonic
NONRATT005081.2	0.359257	-1.47691	0.00554103	Down	chr10:103831798:103832851:-	1053	Exonic
NONRATT005092.2	2.1848	1.1275	0.0342314	Up	chr10:105645750:105649943:+	710	Linc
NONRATT005094.2	6.53443	2.70806	0.0427589	Up	chr10:105649024:105649940:+	916	Linc
NONRATT005113.2	4.81684	2.26809	0.0166156	Up	chr10:107021799:107022538:+	739	Linc
NONRATT005114.2	11.1797	3.48281	0.0313113	Up	chr10:107021829:107026195:+	440	Linc
NONRATT005118.2	6.80212	2.76599	0.0064738	Up	chr10:107028720:107030208:+	1488	Linc
NONRATT005133.2	7.50624	2.90809	1.39e-05	Up	chr10:109180989:109183314:+	2325	Exonic
NONRATT005191.2	4.68639	2.22848	0.0171965	Up	chr10:7056863:7063512:-	1156	Exonic
NONRATT005199.2	0.294368	-1.76431	0.00227317	Down	chr10:8491554:8686980:-	809	Exonic
NONRATT005213.2	Inf	Inf	0.0308905	Up	chr10:10832395:10839322:-	1821	Exonic
NONRATT005222.2	4.48234	2.16425	0.018075	Up	chr10:11990579:11994459:-	397	Linc
NONRATT005233.2	0.464778	-1.10539	0.0491495	Down	chr10:12887363:12888062:-	699	Exonic
NONRATT005259.2	54.8697	5.77794	0.000596832	Up	chr10:14021144:14022393:-	397	Exonic
NONRATT005270.2	0.0954266	-3.38946	0.0483394	Down	chr10:14442192:14445439:-	783	Exonic
NONRATT005274.2	3.22178	1.68786	0.0108371	Up	chr10:14622711:14625907:-	1034	Exonic
NONRATT005282.2	0.329467	-1.60179	0.0161049	Down	chr10:15152699:15155407:-	2016	Antisense
NONRATT005290.2	0.350663	-1.51184	0.0219056	Down	chr10:15201502:15202148:-	646	Exonic
NONRATT005321.2	0	#NAME?	0.00122386	Down	chr10:15984519:15987063:-	2544	Linc
NONRATT005329.2	2.21211	1.14542	0.0343051	Up	chr10:16770174:16792868:-	327	Exonic
NONRATT005350.2	0.365322	-1.45276	0.0297061	Down	chr10:20845114:20846454:-	1340	Exonic
NONRATT005409.2	15.9055	3.99145	0.0407381	Up	chr10:37223692:37228342:-	295	Antisense
NONRATT005433.2	19.0116	4.24881	0.00113944	Up	chr10:40057201:40122505:-	698	Exonic
NONRATT005486.2	0.207331	-2.26999	0.00175479	Down	chr10:46182681:46185675:-	556	Exonic
NONRATT005490.2	0.330883	-1.5956	0.0256402	Down	chr10:46599390:46605469:-	3285	Linc
NONRATT005511.2	58.8824	5.87976	0.00513047	Up	chr10:48587105:48593320:-	607	Exonic
NONRATT005576.2	4.40659	2.13966	0.00196408	Up	chr10:56271994:56272680:-	686	Exonic
NONRATT005579.2	5.61399	2.48903	0.00102988	Up	chr10:56276172:56276759:-	587	Exonic
NONRATT005603.2	Inf	Inf	0.0216291	Up	chr10:56578984:56582007:-	484	Exonic
NONRATT005625.2	3.24803	1.69957	0.00978753	Up	chr10:57274374:57275690:-	1316	Exonic
NONRATT005632.2	116.036	6.85843	5.77e-08	Up	chr10:57415528:57416194:-	461	Linc
NONRATT005711.2	0.326587	-1.61446	0.00921187	Down	chr10:63795144:63796879:+	1439	Exonic
NONRATT005718.2	0.444382	-1.17013	0.0361629	Down	chr10:63721055:63721876:+	821	Linc
NONRATT005752.2	0.370583	-1.43213	0.0122967	Down	chr10:65587814:65590094:+	419	Exonic
NONRATT005753.2	0.188651	-2.40621	0.0081689	Down	chr10:65586513:65588015:+	352	Exonic
NONRATT005764.2	0.119127	-3.06942	0.0365724	Down	chr10:65439173:65439645:+	472	Exonic
NONRATT005772.2	3.30216	1.72341	0.0460957	Up	chr10:67753080:67753637:-	557	Antisense
NONRATT005775.2	0	#NAME?	4.19e-08	Down	chr10:67866931:67869199:-	2268	Exonic
NONRATT005821.2	5.63559	2.49457	0.000845545	Up	chr10:76361726:76365407:+	3681	Exonic
NONRATT005839.2	23.3587	4.54589	0.000739995	Up	chr10:75050669:75051266:+	597	Linc
NONRATT005847.2	0.43557	-1.19902	0.0302206	Down	chr10:74883461:74884200:+	513	Exonic
NONRATT005876.2	10.4067	3.37944	0.0442008	Up	chr10:81648215:81648740:-	525	Exonic
NONRATT005923.2	Inf	Inf	0.0438924	Up	chr10:83584503:83585255:-	752	Linc
NONRATT005960.2	0.00849946	-6.87841	4.03e-12	Down	chr10:85655223:85658023:-	2800	Linc
NONRATT005964.2	Inf	Inf	0.00215395	Up	chr10:85945464:85947506:-	670	Exonic
NONRATT005991.2	0.22753	-2.13587	0.0143408	Down	chr10:87142106:87147767:-	427	Linc
NONRATT005995.2	0.245534	-2.02601	0.00400682	Down	chr10:87238722:87239205:-	483	Linc
NONRATT006018.2	0.485212	-1.04331	0.0260967	Down	chr10:88373050:88377698:-	4648	Linc
NONRATT006035.2	5.32519	2.41283	0.0372398	Up	chr10:88809396:88810399:-	710	Exonic
NONRATT006089.2	3.58372	1.84146	0.0268823	Up	chr10:90352135:90352648:-	410	Exonic
NONRATT006107.2	4.84717	2.27714	0.0122091	Up	chr10:90937417:90938879:-	1462	Linc
NONRATT006109.2	3.57224	1.83683	0.00137936	Up	chr10:90992197:90992766:-	569	Exonic
NONRATT006114.2	Inf	Inf	0.0151014	Up	chr10:91101466:91117887:-	354	Exonic
NONRATT006147.2	0.0684357	-3.86911	0.0498159	Down	chr10:93518923:93520186:-	1006	Antisense
NONRATT006212.2	0.0031717	-8.30053	0.0040744	Down	chr10:97733700:97735485:-	1785	Linc
NONRATT006228.2	Inf	Inf	0.0155707	Up	chr10:98581262:98582000:-	623	Exonic
NONRATT006252.2	37.1956	5.21706	8.16e-05	Up	chr10:104955084:105052289:+	596	Exonic
NONRATT006253.2	33.4761	5.06506	2.58e-05	Up	chr10:104998707:104999399:+	692	Sense No Exonic
NONRATT006267.2	0.461862	-1.11446	0.0409726	Down	chr10:104343232:104343879:+	647	Linc
NONRATT006276.2	0.188687	-2.40594	0.00549351	Down	chr10:103946885:103948314:+	1429	Linc
NONRATT006303.2	3.58843	1.84335	0.0269592	Up	chr10:105781727:105783534:-	670	Exonic
NONRATT006309.2	19.0344	4.25054	0.00827375	Up	chr10:105792780:105794021:-	644	Exonic
NONRATT006314.2	0.193796	-2.36739	0.0195223	Down	chr10:106591748:106616448:-	377	Linc
NONRATT006315.2	Inf	Inf	1.39e-22	Up	chr10:106973848:106974402:-	554	Linc
NONRATT006327.2	0.414152	-1.27177	0.01036	Down	chr10:107515816:107517336:-	1520	Sense No Exonic
NONRATT006332.2	0.490067	-1.02895	0.0412937	Down	chr10:108682338:108683723:-	1385	Exonic
NONRATT006346.2	0.444518	-1.16969	0.0212849	Down	chr10:109371567:109373587:-	2020	Linc
NONRATT006349.2	0.315004	-1.66656	0.0332878	Down	chr10:109417990:109418751:-	761	Linc
NONRATT006359.2	3.1424	1.65187	0.0285568	Up	chr10:109719136:109720042:-	906	Linc
NONRATT006386.2	3.04664	1.60722	0.00110424	Up	chr10:112491890:112500665:-	1677	Linc
NONRATT006396.2	38.3205	5.26004	0.00695352	Up	chr11:3165108:3166447:+	1339	Linc
NONRATT006404.2	4.28956	2.10083	0.0259934	Up	chr11:16660774:16661352:+	578	Linc
NONRATT006406.2	0	#NAME?	0.000771559	Down	chr11:17555406:17560302:+	1557	Exonic
NONRATT006414.2	0.0300373	-5.0571	8.52e-05	Down	chr11:24280763:24285277:+	3222	Exonic
NONRATT006419.2	3.44792	1.78573	0.01569	Up	chr11:27608800:27611005:+	2205	Linc
NONRATT006450.2	10.3628	3.37334	0.0287648	Up	chr11:31821959:31823761:+	1066	Exonic
NONRATT006460.2	0.454358	-1.1381	0.0336591	Down	chr11:32075368:32077465:+	2097	Linc
NONRATT006463.2	2.58373	1.36945	0.0166782	Up	chr11:32236470:32237221:+	751	Linc
NONRATT006464.2	2.90186	1.53698	0.00216177	Up	chr11:32238024:32239958:+	1934	Linc
NONRATT006466.2	Inf	Inf	0.0324351	Up	chr11:32266081:32269048:+	239	Linc
NONRATT006480.2	0.32159	-1.6367	0.00590144	Down	chr11:34598299:34639826:+	425	Exonic
NONRATT006508.2	0.0170394	-5.87498	0.0071283	Down	chr11:38874136:38881583:+	672	Linc
NONRATT006528.2	0.149403	-2.74272	0.00594112	Down	chr11:46192455:46206412:+	937	Exonic
NONRATT006610.2	0.43144	-1.21277	0.0257522	Down	chr11:66569554:66570419:+	865	Linc
NONRATT006611.2	0.357912	-1.48232	0.00606855	Down	chr11:66570954:66572162:+	1208	Linc
NONRATT006620.2	Inf	Inf	0.0276623	Up	chr11:68576270:68577274:+	1004	Sense No Exonic
NONRATT006648.2	0.459876	-1.12068	0.0335388	Down	chr11:72612976:72615057:+	2081	Antisense
NONRATT006663.2	Inf	Inf	7.73e-06	Up	chr11:74055117:74055573:+	456	Linc
NONRATT006674.2	0.295316	-1.75967	0.00102724	Down	chr11:76169674:76171502:+	1828	Linc
NONRATT006691.2	3.87438	1.95397	0.00677648	Up	chr11:77470049:77470867:-	818	Sense No Exonic
NONRATT006692.2	4.1434	2.05082	0.000430184	Up	chr11:77469035:77469763:-	728	Sense No Exonic
NONRATT006714.2	0.40527	-1.30304	0.0146043	Down	chr11:83975347:83975683:+	336	Exonic
NONRATT006715.2	0.438423	-1.18961	0.0157687	Down	chr11:83976667:83977488:+	821	Linc
NONRATT006720.2	0.351565	-1.50814	0.00566451	Down	chr11:84327710:84329437:+	1727	Linc
NONRATT006723.2	0.116508	-3.1015	0.0110338	Down	chr11:84826703:84833503:+	734	Linc
NONRATT006744.2	0.256591	-1.96246	0.000631479	Down	chr11:87072456:87074050:+	1421	Sense No Exonic
NONRATT006792.2	0.454613	-1.13729	0.0255057	Down	chr11:4167530:4169014:-	1484	Linc
NONRATT006797.2	0.407878	-1.29379	0.0493642	Down	chr11:10727507:10730088:-	2581	Linc
NONRATT006817.2	2.33226	1.22173	0.0164235	Up	chr11:16873645:16874574:-	929	Exonic
NONRATT006842.2	0.224454	-2.15551	0.0232172	Down	chr11:29931081:29932098:-	1017	Exonic
NONRATT006864.2	0.399462	-1.32387	0.0248304	Down	chr11:31353588:31355032:-	1444	Linc
NONRATT006877.2	Inf	Inf	0.0010889	Up	chr11:31856965:31867960:-	278	Exonic
NONRATT006883.2	0.292021	-1.77586	0.022441	Down	chr11:32307555:32308382:-	377	Linc
NONRATT006912.2	0.362421	-1.46426	0.0248827	Down	chr11:36344987:36347427:-	2440	Linc
NONRATT006933.2	16.1861	4.01668	0.0107287	Up	chr11:43987593:43992576:-	748	Exonic
NONRATT006938.2	0.472704	-1.08099	0.0451851	Down	chr11:44217255:44221946:-	1349	Antisense
NONRATT006952.2	3.59326	1.84529	0.00872238	Up	chr11:47116881:47122072:-	1635	Exonic
NONRATT006953.2	3.13769	1.6497	0.0367708	Up	chr11:47118717:47121988:-	615	Exonic
NONRATT006959.2	0.0939076	-3.41261	0.0396771	Down	chr11:53511483:53513470:-	1987	Linc
NONRATT007009.2	3.0201	1.5946	0.00234389	Up	chr11:64715678:64718103:+	2425	Linc
NONRATT007025.2	0	#NAME?	0.00343191	Down	chr11:66857736:66878560:-	822	Exonic
NONRATT007123.2	2.78704	1.47873	0.0196886	Up	chr11:81374860:81376065:-	744	Exonic
NONRATT007161.2	0.379157	-1.39913	0.00671446	Down	chr11:84609966:84610925:-	959	Linc
NONRATT007167.2	24.5481	4.61754	0.0366199	Up	chr11:85322462:85322787:-	325	Linc
NONRATT007184.2	3.33952	1.73964	0.00754242	Up	chr11:87563259:87576262:-	1999	Exonic
NONRATT007185.2	3.04666	1.60723	0.0200806	Up	chr11:87587461:87628624:-	1355	Exonic
NONRATT007222.2	915.992	9.83919	1.37e-07	Up	chr12:2213723:2217002:+	861	Exonic
NONRATT007224.2	2.59926	1.3781	0.0177596	Up	chr12:2490994:2492729:+	1735	Sense No Exonic
NONRATT007250.2	Inf	Inf	6.16e-06	Up	chr12:8102900:8106380:+	2134	Exonic
NONRATT007325.2	7.06679	2.82106	0.0091702	Up	chr12:17252152:17255194:+	585	Exonic
NONRATT007339.2	2.26451	1.1792	0.048992	Up	chr12:18532106:18534765:+	1239	Exonic
NONRATT007430.2	0.149142	-2.74524	0.0332676	Down	chr12:30160774:30165923:+	484	Exonic
NONRATT007487.2	24.1373	4.59319	6.62e-08	Up	chr12:38161647:38162391:+	744	Linc
NONRATT007490.2	17.9187	4.1634	0.000630961	Up	chr12:38274371:38279899:+	370	Exonic
NONRATT007525.2	0.0349981	-4.83658	0.000573702	Down	chr12:39420245:39423718:+	428	Exonic
NONRATT007553.2	0.246647	-2.01948	0.0280641	Down	chr12:40619351:40619727:+	376	Exonic
NONRATT007564.2	0.447147	-1.16118	0.0380743	Down	chr12:41485249:41488889:+	1566	Exonic
NONRATT007595.2	3.20867	1.68198	0.00619019	Up	chr12:45905236:45912668:+	529	Exonic
NONRATT007649.2	0.409809	-1.28698	0.00726859	Down	chr12:50447250:50461859:+	8474	Linc
NONRATT007702.2	3.27795	1.7128	0.00286793	Up	chr12:4912960:4913686:-	726	Linc
NONRATT007716.2	Inf	Inf	0.0478843	Up	chr12:6713533:6714172:-	639	Linc
NONRATT007736.2	2.68579	1.42535	0.0438725	Up	chr12:9997844:9999282:-	683	Exonic
NONRATT007741.2	2.30958	1.20763	0.0346516	Up	chr12:11138400:11144766:-	1441	Exonic
NONRATT007747.2	5.80957	2.53843	0.000109888	Up	chr12:11250952:11253132:-	2048	Exonic
NONRATT007792.2	27.3969	4.77594	2.44e-05	Up	chr12:16285729:16286464:-	735	Exonic
NONRATT007794.2	3.91112	1.96758	0.0278436	Up	chr12:16287516:16288675:-	1159	Exonic
NONRATT007832.2	3.61242	1.85296	0.0492961	Up	chr12:20591371:20829263:-	937	Antisense
NONRATT007865.2	Inf	Inf	0.00252892	Up	chr12:23839398:23839816:-	418	Exonic
NONRATT007881.2	0.00988626	-6.66036	0.0401904	Down	chr12:24543744:24548614:-	1353	Exonic
NONRATT007895.2	0	#NAME?	0.000994604	Down	chr12:25595799:25596484:-	685	Exonic
NONRATT007903.2	0.368574	-1.43997	0.00482655	Down	chr12:29300649:29302750:-	2101	Linc
NONRATT007904.2	0.372208	-1.42582	0.0116104	Down	chr12:29302931:29303956:-	1025	Linc
NONRATT008032.2	0	#NAME?	0.0029851	Down	chr12:44010921:44012003:-	1082	Exonic
NONRATT008043.2	Inf	Inf	0.00159353	Up	chr12:45372538:45372836:-	279	Linc
NONRATT008045.2	0.381071	-1.39187	0.0255552	Down	chr12:46331529:46361441:-	672	Exonic
NONRATT008046.2	0.453362	-1.14126	0.0397829	Down	chr12:46413980:46432237:-	1182	Exonic
NONRATT008083.2	14.3844	3.84644	0.00357984	Up	chr12:48625643:48627241:-	345	Exonic
NONRATT008142.2	2.18628	1.12848	0.0226584	Up	chr13:27920423:27921458:+	1035	Linc
NONRATT008157.2	Inf	Inf	0.0435509	Up	chr13:37451894:37453352:+	282	Exonic
NONRATT008167.2	0.487465	-1.03663	0.0492147	Down	chr13:44160496:44163159:+	2663	Linc
NONRATT008235.2	0.323252	-1.62927	0.000742058	Down	chr13:51579676:51581940:+	2264	Linc
NONRATT008274.2	0.351673	-1.50769	0.0112958	Down	chr13:56237564:56238301:+	731	Linc
NONRATT008294.2	27.5429	4.78361	0.0054071	Up	chr13:67358261:67359342:+	1081	Linc
NONRATT008320.2	0.47345	-1.07872	0.0312819	Down	chr13:70560958:70562103:+	1145	Linc
NONRATT008360.2	0.4726	-1.08131	0.0440891	Down	chr13:77676625:77678181:+	1556	Exonic
NONRATT008370.2	0.238337	-2.06892	0.00214007	Down	chr13:78792125:78794667:+	2542	Linc
NONRATT008371.2	5.56136	2.47544	3.13e-06	Up	chr13:78852518:78855844:+	2549	Linc
NONRATT008372.2	2.80838	1.48974	0.0449921	Up	chr13:78852522:78855844:+	429	Linc
NONRATT008373.2	57.9108	5.85576	0.00496695	Up	chr13:78853131:78854210:+	710	Linc
NONRATT008374.2	5.29701	2.40518	8.29e-05	Up	chr13:78853131:78855837:+	689	Linc
NONRATT008375.2	5.58291	2.48102	1.77e-05	Up	chr13:78853131:78855841:+	1132	Linc
NONRATT008378.2	4.46991	2.16025	0.0104874	Up	chr13:78853131:78855845:+	961	Linc
NONRATT008381.2	5.45553	2.44772	8.25e-06	Up	chr13:78855174:78856208:+	1034	Linc
NONRATT008391.2	Inf	Inf	0.0117458	Up	chr13:79204474:79205290:+	816	Linc
NONRATT008427.2	0.414787	-1.26956	0.0476048	Down	chr13:84534356:84535617:+	1261	Linc
NONRATT008464.2	0.315125	-1.666	0.00165535	Down	chr13:90532297:90533435:+	243	Exonic
NONRATT008492.2	0.207572	-2.26832	0.036297	Down	chr13:95591464:95593316:+	1852	Linc
NONRATT008609.2	0	#NAME?	0.0171149	Down	chr13:15175754:15395658:-	473	Exonic
NONRATT008648.2	0.0767396	-3.70389	7.26e-06	Down	chr13:35678241:35679398:-	1128	Exonic
NONRATT008659.2	2.06854	1.04861	0.0414627	Up	chr13:41720150:41738918:-	424	Exonic
NONRATT008660.2	0.381626	-1.38977	0.0187528	Down	chr13:42215714:42217719:-	2005	Antisense
NONRATT008675.2	Inf	Inf	0.0151873	Up	chr13:47136308:47138118:-	704	Exonic
NONRATT008708.2	0.461542	-1.11547	0.0242721	Down	chr13:50555453:50564219:-	3869	Linc
NONRATT008731.2	0.24303	-2.04079	0.00392095	Down	chr13:51583381:51585009:-	1628	Exonic
NONRATT008764.2	12.0072	3.58582	0.0151863	Up	chr13:55114408:55116581:-	2173	Exonic
NONRATT008790.2	2.54754	1.34911	0.0183404	Up	chr13:64703722:64704501:-	779	Linc
NONRATT008805.2	0.403203	-1.31042	0.0393437	Down	chr13:69257967:69259822:-	1855	Linc
NONRATT008806.2	0.446036	-1.16477	0.0485817	Down	chr13:69264245:69264868:-	623	Linc
NONRATT008818.2	6.35217	2.66725	0.0329483	Up	chr13:70674636:70675014:-	378	Sense No Exonic
NONRATT008820.2	5.81204	2.53905	0.0317928	Up	chr13:70738404:70739443:-	1039	Sense No Exonic
NONRATT008821.2	7.87193	2.97672	0.00296617	Up	chr13:70744408:70745144:-	727	Sense No Exonic
NONRATT008831.2	2.96296	1.56704	0.00120313	Up	chr13:71948237:71948853:-	616	Sense No Exonic
NONRATT008834.2	Inf	Inf	0.00135342	Up	chr13:72861090:72862392:-	1302	Linc
NONRATT008856.2	2.82781	1.49969	0.0237376	Up	chr13:74766637:74768235:-	1598	Linc
NONRATT008879.2	0.313309	-1.67434	0.013012	Down	chr13:79906689:79910221:-	3532	Linc
NONRATT008946.2	0.351653	-1.50778	0.0426901	Down	chr13:88651138:88651631:-	493	Linc
NONRATT008953.2	39.0602	5.28763	2.16e-09	Up	chr13:89329326:89330063:-	641	Exonic
NONRATT008954.2	10.9373	3.45118	0.00049529	Up	chr13:89334051:89335496:-	831	Exonic
NONRATT008958.2	5.79899	2.5358	0.0464779	Up	chr13:89602972:89606683:-	715	Exonic
NONRATT008960.2	Inf	Inf	0.00667717	Up	chr13:89611586:89619383:-	519	Exonic
NONRATT008985.2	0.252353	-1.98649	0.0190281	Down	chr13:90657562:90658652:-	576	Exonic
NONRATT009000.2	Inf	Inf	0.0192316	Up	chr13:92238460:92254506:-	506	Antisense
NONRATT009029.2	3.05809	1.61263	0.0124305	Up	chr13:85373680:85376493:-	2813	Linc
NONRATT009038.2	0.276284	-1.85577	0.00287036	Down	chr13:97328094:97329250:-	1156	Linc
NONRATT009067.2	0.369933	-1.43467	0.00777643	Down	chr13:100290857:100291550:-	693	Linc
NONRATT009068.2	0.381733	-1.38936	0.00922206	Down	chr13:100294416:100295266:-	850	Linc
NONRATT009083.2	6.49336	2.69896	0.0285309	Up	chr13:100907420:100928189:-	478	Exonic
NONRATT009208.2	0.355627	-1.49156	0.00271368	Down	chr14:8369575:8372671:+	3096	Linc
NONRATT009220.2	3.60298	1.84919	0.00557907	Up	chr14:10842111:10850538:+	1141	Linc
NONRATT009263.2	27.3308	4.77245	0.00378113	Up	chr14:18844708:18846281:+	1039	Linc
NONRATT009316.2	0	#NAME?	3.3e-12	Down	chr14:36071349:36118818:+	536	Exonic
NONRATT009325.2	14.3302	3.84099	1.5e-08	Up	chr14:37552175:37633787:+	455	Linc
NONRATT009340.2	0.358365	-1.4805	0.00621678	Down	chr14:39802789:39803673:+	884	Linc
NONRATT009363.2	0.0240999	-5.37483	2.14e-09	Down	chr14:44457631:44460044:+	2413	Linc
NONRATT009364.2	12.9176	3.69127	8.03e-05	Up	chr14:44492651:44493044:+	393	Exonic
NONRATT009382.2	0.313576	-1.67311	0.00516442	Down	chr14:48921147:48922983:+	1836	Exonic
NONRATT009402.2	0	#NAME?	5.03e-15	Down	chr14:63190036:63190687:+	651	Linc
NONRATT009409.2	0.0289268	-5.11145	0.00599406	Down	chr14:66748537:66749180:+	643	Linc
NONRATT009423.2	2.91837	1.54516	0.0211167	Up	chr14:71888711:71891143:+	2432	Exonic
NONRATT009426.2	0.368919	-1.43862	0.014437	Down	chr14:72889039:72890880:+	1566	Exonic
NONRATT009471.2	2.27275	1.18444	0.0217211	Up	chr14:81428174:81428511:+	337	Linc
NONRATT009530.2	398.601	8.6388	1.12e-11	Up	chr14:84501194:84502293:+	1099	Linc
NONRATT009546.2	5.55222	2.47307	0.011138	Up	chr14:85756259:85757968:+	597	Exonic
NONRATT009575.2	0	#NAME?	6.68e-08	Down	chr14:94554922:94623205:+	306	Linc
NONRATT009597.2	0.195814	-2.35245	0.0103501	Down	chr14:104887035:104890022:+	2987	Linc
NONRATT009648.2	20.725	4.3733	0.0287317	Up	chr14:113552075:113553447:+	330	Exonic
NONRATT009681.2	0.0558129	-4.16326	0.00261656	Down	chr14:2090857:2092099:-	455	Exonic
NONRATT009696.2	2.96428	1.56768	0.0260356	Up	chr14:2861471:2862312:-	841	Exonic
NONRATT009709.2	3.52125	1.81609	0.0133176	Up	chr14:5451201:5451455:-	254	Linc
NONRATT009723.2	2.99151	1.58088	0.0014091	Up	chr14:7222882:7226321:-	3439	Linc
NONRATT009724.2	22.0751	4.46435	0.0459593	Up	chr14:7228578:7229014:-	436	Sense No Exonic
NONRATT009739.2	8.68433	3.11841	3.38e-05	Up	chr14:10343289:10344206:-	917	Linc
NONRATT009803.2	0.32944	-1.60191	0.00466191	Down	chr14:21103400:21128251:-	684	Exonic
NONRATT009848.2	2.54284	1.34644	0.0320038	Up	chr14:36664035:36665017:-	564	Linc
NONRATT009849.2	2.60802	1.38296	0.0438898	Up	chr14:36664532:36665233:-	701	Linc
NONRATT009857.2	0.312698	-1.67716	0.0050021	Down	chr14:37458073:37465274:-	655	Exonic
NONRATT009870.2	0	#NAME?	0.00284139	Down	chr14:41641553:41722228:-	413	Exonic
NONRATT009996.2	0.491144	-1.02578	0.0305653	Down	chr14:78676779:78678417:-	1638	Linc
NONRATT010014.2	12.1565	3.60365	0.000172205	Up	chr14:86800339:86803328:-	604	Linc
NONRATT010023.2	0.37632	-1.40997	0.0326135	Down	chr14:80933485:80934923:-	1438	Exonic
NONRATT010046.2	0.375906	-1.41156	0.00934405	Down	chr14:82039225:82041113:-	481	Linc
NONRATT010047.2	0.368329	-1.44093	0.00290041	Down	chr14:82039227:82040443:-	1216	Linc
NONRATT010048.2	0.375283	-1.41395	0.00511637	Down	chr14:82040754:82041312:-	558	Linc
NONRATT010049.2	0.389342	-1.36089	0.00792968	Down	chr14:82053684:82055290:-	478	Exonic
NONRATT010108.2	0.238007	-2.07093	0.00585958	Down	chr14:85357220:85358884:-	1664	Exonic
NONRATT010111.2	8.5338	3.09319	0.00966842	Up	chr14:85439806:85446379:-	2397	Exonic
NONRATT010129.2	2.03953	1.02823	0.0379595	Up	chr14:88693575:88710048:-	561	Exonic
NONRATT010175.2	6.40716	2.67969	0.0152084	Up	chr14:108272174:108272734:-	560	Exonic
NONRATT010181.2	4.89413	2.29105	0.00322115	Up	chr14:106317885:106318279:-	394	Linc
NONRATT010200.2	0.429224	-1.2202	0.0235663	Down	chr14:112717805:112719025:-	1220	Linc
NONRATT010211.2	2.01326	1.00953	0.0370314	Up	chr14:114522751:114526693:-	3178	Exonic
NONRATT010227.2	0.103144	-3.27727	0.000115345	Down	chr15:343922:345063:+	1141	Exonic
NONRATT010231.2	0.238676	-2.06688	0.00867672	Down	chr15:1047322:1048267:+	945	Exonic
NONRATT010243.2	0	#NAME?	0.010388	Down	chr15:4187280:4189430:+	759	Exonic
NONRATT010283.2	Inf	Inf	0.0347307	Up	chr15:10464592:10465434:+	842	Exonic
NONRATT010297.2	0.116479	-3.10186	0.00769716	Down	chr15:17664775:17686144:+	558	Exonic
NONRATT010315.2	2.99569	1.58289	0.026969	Up	chr15:20045985:20046868:+	883	Linc
NONRATT010331.2	2.48556	1.31357	0.00580695	Up	chr15:24100809:24101858:+	1049	Exonic
NONRATT010333.2	29.8988	4.90201	1.22e-09	Up	chr15:24160089:24160774:+	685	Exonic
NONRATT010334.2	27.7365	4.79371	1.64e-08	Up	chr15:24163040:24165538:+	1682	Exonic
NONRATT010357.2	7.4105	2.88957	1.33e-06	Up	chr15:27230305:27231061:+	756	Linc
NONRATT010501.2	0.302216	-1.72635	0.00599552	Down	chr15:40667204:40668025:+	821	Linc
NONRATT010502.2	0.270173	-1.88804	0.00651955	Down	chr15:40668197:40668953:+	756	Linc
NONRATT010513.2	0.0663501	-3.91376	0.0289365	Down	chr15:42001056:42002728:+	289	Linc
NONRATT010540.2	3.33813	1.73904	0.00941619	Up	chr15:46338117:46339188:+	1071	Linc
NONRATT010559.2	6.89502	2.78556	8.1e-06	Up	chr15:50901966:50903131:+	1165	Linc
NONRATT010592.2	22.6679	4.50258	0.0344922	Up	chr15:57221226:57221809:+	572	Exonic
NONRATT010756.2	12.6442	3.6604	0.000408315	Up	chr15:11832750:11835744:-	2948	Linc
NONRATT010812.2	0.234066	-2.09501	0.025599	Down	chr15:25427843:25433429:-	317	Linc
NONRATT010844.2	2.88467	1.52841	0.000972643	Up	chr15:30541403:30544743:-	3340	Linc
NONRATT010861.2	3.53994	1.82372	0.0355365	Up	chr15:33300036:33300467:-	431	Sense No Exonic
NONRATT010912.2	89.1923	6.47885	0.000272164	Up	chr15:34472269:34473773:-	749	Exonic
NONRATT010917.2	0.240054	-2.05857	0.0311151	Down	chr15:34565709:34566735:-	685	Exonic
NONRATT010933.2	2.0591	1.04201	0.0498758	Up	chr15:37042242:37047960:-	1587	Linc
NONRATT010934.2	3.07448	1.62034	0.027596	Up	chr15:37047991:37050076:-	534	Linc
NONRATT010938.2	0.18981	-2.39737	5.57e-05	Down	chr15:37402215:37409702:-	429	Exonic
NONRATT010991.2	0.363488	-1.46002	0.0216174	Down	chr15:44887296:44888522:+	1226	Linc
NONRATT011002.2	0.37077	-1.4314	0.0168259	Down	chr15:43404577:43406001:+	1424	Linc
NONRATT011016.2	0.476443	-1.06962	0.0267547	Down	chr15:46694040:46696946:-	2906	Linc
NONRATT011024.2	2.55592	1.35384	0.032259	Up	chr15:48445766:48564098:-	338	Linc
NONRATT011092.2	Inf	Inf	0.0189424	Up	chr15:58012632:58068779:-	483	Exonic
NONRATT011107.2	0.400573	-1.31986	0.00843727	Down	chr15:59986851:59988857:-	2006	Linc
NONRATT011110.2	0.0551167	-4.18137	0.0207319	Down	chr15:60277308:60287390:-	554	Linc
NONRATT011125.2	0	#NAME?	0.0109861	Down	chr15:69928503:69929201:-	698	Exonic
NONRATT011218.2	0	#NAME?	0.0432009	Down	chr15:109338762:109339329:-	567	Exonic
NONRATT011224.2	3.3583	1.74773	0.00641792	Up	chr16:761101:762091:+	667	Exonic
NONRATT011231.2	3.79762	1.9251	0.0200587	Up	chr16:1782899:1864190:+	1101	Exonic
NONRATT011288.2	0	#NAME?	0.0118517	Down	chr16:7435579:7446128:+	713	Exonic
NONRATT011359.2	Inf	Inf	0.0420527	Up	chr16:19525607:19526368:+	761	Exonic
NONRATT011367.2	0.0929273	-3.42775	0.00530815	Down	chr16:19752292:19754064:+	1343	Exonic
NONRATT011417.2	Inf	Inf	0.00621374	Up	chr16:20736025:20736374:+	349	Linc
NONRATT011420.2	4.63754	2.21336	0.0106401	Up	chr16:20845206:20845636:+	430	Antisense
NONRATT011433.2	13.2508	3.728	0.0255638	Up	chr16:21263999:21266056:+	844	Exonic
NONRATT011497.2	3.64998	1.86789	0.0406309	Up	chr16:47667427:47668184:+	757	Exonic
NONRATT011627.2	0.489576	-1.0304	0.0498019	Down	chr16:74092234:74093118:+	884	Linc
NONRATT011690.2	0.0901104	-3.47216	0.0317777	Down	chr16:559518:559937:-	419	Linc
NONRATT011693.2	0.337433	-1.56733	0.00258521	Down	chr16:885082:909640:-	543	Exonic
NONRATT011739.2	4.12415	2.0441	0.00100798	Up	chr16:7097579:7103524:-	2850	Exonic
NONRATT011766.2	4.11116	2.03954	0.033586	Up	chr16:8204617:8207449:-	2425	Exonic
NONRATT011767.2	4.4879	2.16604	0.000513672	Up	chr16:8204620:8207144:-	756	Exonic
NONRATT011952.2	0.431402	-1.21289	0.0216117	Down	chr16:36125928:36127276:-	1348	Linc
NONRATT012014.2	2.07889	1.05581	0.0257836	Up	chr16:54455037:54457355:-	2318	Linc
NONRATT012016.2	11.6301	3.53979	0.00620295	Up	chr16:54510009:54510577:-	568	Sense No Exonic
NONRATT012020.2	Inf	Inf	0.0186678	Up	chr16:54871438:54871800:-	362	Exonic
NONRATT012026.2	Inf	Inf	0.0231181	Up	chr16:56855253:56865600:-	799	Exonic
NONRATT012033.2	4.28889	2.1006	0.00617146	Up	chr16:59364459:59366772:-	588	Exonic
NONRATT012054.2	13.5663	3.76195	0.0390113	Up	chr16:68955015:68955931:-	916	Exonic
NONRATT012064.2	2.91771	1.54483	0.0103385	Up	chr16:71121607:71125272:-	1777	Exonic
NONRATT012075.2	9.65007	3.27054	0.0426787	Up	chr16:71304696:71305175:-	479	Sense No Exonic
NONRATT012135.2	0.262071	-1.93197	0.0422334	Down	chr16:81636834:81637726:-	892	Linc
NONRATT012177.2	5.2031	2.37937	0.00014611	Up	chr17:795752:825062:+	1330	Exonic
NONRATT012181.2	Inf	Inf	5.56e-05	Up	chr17:823958:825066:+	632	Exonic
NONRATT012182.2	5.05793	2.33855	0.000470334	Up	chr17:824043:825078:+	1035	Exonic
NONRATT012234.2	0.250018	-1.9999	0.0212048	Down	chr17:6875402:6878849:+	2190	Exonic
NONRATT012242.2	0.494642	-1.01554	0.0433455	Down	chr17:7798657:7800431:+	1774	Linc
NONRATT012253.2	15.1409	3.92038	0.00431341	Up	chr17:9109696:9110258:+	404	Exonic
NONRATT012254.2	19.0285	4.25009	0.00271786	Up	chr17:9113797:9114996:+	1199	Exonic
NONRATT012265.2	3.46671	1.79357	0.0472685	Up	chr17:9631928:9632990:+	716	Exonic
NONRATT012272.2	29.564	4.88577	0.0132415	Up	chr17:9668156:9668712:+	556	Exonic
NONRATT012273.2	Inf	Inf	0.00293888	Up	chr17:9679578:9684186:+	414	Exonic
NONRATT012363.2	0.440261	-1.18357	0.0178947	Down	chr17:18413093:18420203:-	3025	Exonic
NONRATT012376.2	0.393284	-1.34636	0.00619449	Down	chr17:23761972:23764392:+	2420	Linc
NONRATT012423.2	2.52123	1.33413	0.0373172	Up	chr17:31494162:31494932:+	770	Exonic
NONRATT012436.2	2.69256	1.42898	0.0429346	Up	chr17:35727809:35729079:+	1270	Linc
NONRATT012493.2	5.72511	2.5173	0.0232931	Up	chr17:49610782:49612237:+	718	Exonic
NONRATT012519.2	5.87741	2.55518	0.0127299	Up	chr17:57060031:57060946:+	915	Exonic
NONRATT012543.2	0.341964	-1.54808	0.0447712	Down	chr17:44608426:44645071:-	2066	Linc
NONRATT012553.2	0.454712	-1.13697	0.0318956	Down	chr17:58014663:58016224:+	1561	Sense No Exonic
NONRATT012560.2	0.373662	-1.4202	0.023604	Down	chr17:60251589:60252767:+	1178	Linc
NONRATT012586.2	10.772	3.42921	0.0116505	Up	chr17:70297312:70298695:+	1383	Linc
NONRATT012595.2	4.86965	2.28382	0.0489703	Up	chr17:70684368:70684923:+	555	Exonic
NONRATT012598.2	10.15	3.34341	0.00923498	Up	chr17:70709710:70710251:+	541	Exonic
NONRATT012600.2	2.50095	1.32247	0.0239825	Up	chr17:70712375:70713734:+	1359	Linc
NONRATT012618.2	0.383749	-1.38177	0.00787194	Down	chr17:76940263:76941103:+	840	Linc
NONRATT012640.2	0	#NAME?	0.0312667	Down	chr17:81455945:81457020:+	307	Linc
NONRATT012668.2	2.49776	1.32063	0.01033	Up	chr17:86409600:86410677:+	1077	Linc
NONRATT012705.2	0.333456	-1.58443	0.00121841	Down	chr17:1029241:1031079:-	1838	Linc
NONRATT012745.2	0.411877	-1.27971	0.0175945	Down	chr17:5930742:5931476:-	734	Linc
NONRATT012746.2	0.393856	-1.34426	0.0218677	Down	chr17:5931688:5932388:-	700	Linc
NONRATT012797.2	6.60411	2.72336	0.00143862	Up	chr17:10361306:10364544:-	376	Exonic
NONRATT012941.2	0.316967	-1.6576	0.00385454	Down	chr17:37512513:37542025:-	663	Linc
NONRATT012947.2	2.49204	1.31733	0.0448532	Up	chr17:39495325:39495829:-	504	Linc
NONRATT012952.2	0.372662	-1.42406	0.0431233	Down	chr17:42085029:42088445:-	791	Exonic
NONRATT013040.2	5.85204	2.54894	0.00183889	Up	chr17:44566991:44570784:+	1062	Linc
NONRATT013069.2	0.0883683	-3.50033	0.0149392	Down	chr17:65533994:65535082:-	1088	Exonic
NONRATT013156.2	0.16999	-2.55648	0.0205178	Down	chr17:84826185:84826549:-	364	Linc
NONRATT013185.2	Inf	Inf	0.0350159	Up	chr17:90603449:90626999:-	329	Linc
NONRATT013189.2	Inf	Inf	0.0461337	Up	chr18:324979:325377:+	398	Antisense
NONRATT013242.2	9.08041	3.18276	0.00242351	Up	chr18:13728008:13757322:+	769	Antisense
NONRATT013260.2	Inf	Inf	0.0225842	Up	chr18:16631205:16636079:+	424	Exonic
NONRATT013308.2	30.484	4.92998	0.00223428	Up	chr18:26568721:26569662:+	687	Linc
NONRATT013389.2	6.29716	2.6547	0.00333111	Up	chr18:31449410:31449720:+	310	Exonic
NONRATT013402.2	13.3768	3.74167	0.00955337	Up	chr18:36835738:36845131:+	768	Exonic
NONRATT013473.2	6.08099	2.60431	0.000403878	Up	chr18:55585581:55587010:+	1429	Linc
NONRATT013479.2	5.70418	2.51202	0.000898467	Up	chr18:56046325:56047364:+	1039	Linc
NONRATT013498.2	2.04135	1.02953	0.0408825	Up	chr18:56914286:56917440:+	2462	Linc
NONRATT013504.2	16.7217	4.06365	0.00107763	Up	chr18:58300433:58300982:+	549	Linc
NONRATT013509.2	0.439525	-1.18598	0.0218777	Down	chr18:59757926:59759479:+	1553	Linc
NONRATT013510.2	0.422049	-1.24452	0.0277682	Down	chr18:59762072:59763645:+	1573	Linc
NONRATT013578.2	3.6381	1.86318	0.0202454	Up	chr18:70970573:70972032:+	1354	Exonic
NONRATT013587.2	Inf	Inf	0.043485	Up	chr18:76922918:76923851:-	933	Exonic
NONRATT013625.2	0.32338	-1.6287	0.00108156	Down	chr18:79434340:79435400:+	1060	Sense No Exonic
NONRATT013641.2	0.233086	-2.10106	0.00333005	Down	chr18:83587561:83588202:+	641	Exonic
NONRATT013679.2	0.0136618	-6.19371	0.0447063	Down	chr18:13879623:13891256:-	1082	Exonic
NONRATT013695.2	0.115452	-3.11463	8.55e-05	Down	chr18:16450159:16453163:-	3004	Exonic
NONRATT013703.2	0	#NAME?	0.00806576	Down	chr18:17396723:17397056:-	333	Exonic
NONRATT013714.2	0.282916	-1.82155	0.000501752	Down	chr18:24731029:24731898:-	869	Antisense
NONRATT013721.2	0.473387	-1.07891	0.0236768	Down	chr18:26183752:26212799:-	2037	Exonic
NONRATT013734.2	16.3017	4.02695	0.00945466	Up	chr18:27406612:27407328:-	360	Exonic
NONRATT013753.2	21.7784	4.44483	5.75e-15	Up	chr18:29330301:29332084:-	1502	Exonic
NONRATT013784.2	3.65919	1.87152	0.0011404	Up	chr18:31336946:31337613:-	667	Linc
NONRATT013846.2	2.57601	1.36514	0.00471398	Up	chr18:56516064:56518066:-	2002	Linc
NONRATT013887.2	2.82079	1.4961	0.0493678	Up	chr18:62387649:62387951:-	302	Linc
NONRATT013917.2	9.18639	3.1995	0.0237538	Up	chr18:69634717:69647609:-	703	Exonic
NONRATT013979.2	0.440939	-1.18135	0.0260985	Down	chr18:86411951:86413024:-	1073	Linc
NONRATT013980.2	0.393766	-1.34459	0.020404	Down	chr18:86413834:86414445:-	611	Linc
NONRATT013984.2	0.211618	-2.24047	5.16e-05	Down	chr19:297470:300974:+	423	Linc
NONRATT014013.2	8.26566	3.04713	0.0165085	Up	chr19:10004307:10012038:+	809	Exonic
NONRATT014093.2	2.20806	1.14278	0.0189823	Up	chr19:23843602:23843936:+	334	Linc
NONRATT014118.2	0.461104	-1.11684	0.0264345	Down	chr19:25070504:25071112:+	608	Linc
NONRATT014125.2	7.0738	2.82249	3.79e-05	Up	chr19:25319188:25319840:+	652	Linc
NONRATT014126.2	0.400132	-1.32145	0.0472728	Down	chr19:25525331:25526003:+	672	Linc
NONRATT014169.2	0.341065	-1.55188	0.0291754	Down	chr19:31524646:31525107:+	461	Linc
NONRATT014170.2	0.101796	-3.29624	4.03e-05	Down	chr19:31611279:31614488:+	727	Exonic
NONRATT014171.2	0.383425	-1.38299	0.00810918	Down	chr19:31618709:31621135:+	2426	Linc
NONRATT014188.2	0.31853	-1.6505	0.00351752	Down	chr19:34760503:34826619:+	1429	Antisense
NONRATT014253.2	0.34379	-1.5404	0.0477004	Down	chr19:40618089:40619686:+	1401	Linc
NONRATT014260.2	3.5442	1.82546	0.00519364	Up	chr19:41934882:41939459:+	4577	Linc
NONRATT014268.2	128.252	7.00284	0.00181138	Up	chr19:42097996:42099111:+	1115	Exonic
NONRATT014287.2	3.79002	1.92221	0.02699	Up	chr19:43750990:43751728:+	738	Linc
NONRATT014354.2	0.289528	-1.78822	0.00710906	Down	chr19:54616326:54616947:+	621	Linc
NONRATT014414.2	0.123928	-3.01242	0.02877	Down	chr19:58567397:58579338:+	560	Exonic
NONRATT014428.2	0.167197	-2.58038	0.0121385	Down	chr19:294017:432140:-	585	Linc
NONRATT014445.2	0.0936355	-3.4168	0.00575032	Down	chr19:9801796:9802368:-	572	Exonic
NONRATT014472.2	0.0229698	-5.44412	0.00609875	Down	chr19:11520514:11523333:-	2819	Sense No Exonic
NONRATT014548.2	14.345	3.84248	0.0327812	Up	chr19:24855662:24856385:-	723	Exonic
NONRATT014582.2	0.0689546	-3.85821	1.38e-05	Down	chr19:26080942:26084723:-	671	Exonic
NONRATT014611.2	0.343412	-1.54199	0.00369418	Down	chr19:34408261:34410890:-	2629	Exonic
NONRATT014661.2	0.333996	-1.5821	0.0314339	Down	chr19:39244757:39245658:-	901	Linc
NONRATT014686.2	6.42461	2.68361	7.83e-05	Up	chr19:41669034:41669719:-	685	Linc
NONRATT014696.2	0.015305	-6.02985	2.62e-06	Down	chr19:42105941:42110179:-	403	Exonic
NONRATT014744.2	0.319102	-1.64791	0.0297373	Down	chr19:47685973:47686639:-	666	Linc
NONRATT014745.2	0.24324	-2.03955	0.0374469	Down	chr19:47695342:48195774:-	523	Exonic
NONRATT014843.2	0.431427	-1.21281	0.0195477	Down	chr19:59859400:59860267:-	867	Linc
NONRATT014844.2	0.433314	-1.20652	0.0164831	Down	chr19:59861552:59861898:-	346	Linc
NONRATT014852.2	2.64653	1.4041	0.0113862	Up	chr2:127208:127595:+	387	Linc
NONRATT014857.2	2.62061	1.3899	0.00589045	Up	chr2:1524039:1524887:+	848	Antisense
NONRATT014858.2	2.67729	1.42077	0.00203321	Up	chr2:1525040:1528236:+	3196	Antisense
NONRATT014868.2	3.16958	1.66429	0.00798302	Up	chr2:2606025:2606333:+	308	Exonic
NONRATT014883.2	3.54717	1.82667	0.00470741	Up	chr2:6633353:6635411:+	1618	Linc
NONRATT014888.2	0	#NAME?	0.0446119	Down	chr2:11818406:11820584:+	2178	Linc
NONRATT014908.2	0.247015	-2.01733	0.00712793	Down	chr2:18417558:18419081:+	1523	Linc
NONRATT014926.2	0.0170944	-5.87033	0.0294865	Down	chr2:22432622:22435494:+	557	Linc
NONRATT014981.2	0.440701	-1.18213	0.028431	Down	chr2:34285247:34288769:+	2404	Exonic
NONRATT014989.2	2.17824	1.12316	0.0491383	Up	chr2:38142203:38145755:+	1975	Exonic
NONRATT015049.2	0	#NAME?	1.45e-15	Down	chr2:53114682:53115304:+	622	Exonic
NONRATT015052.2	0.411901	-1.27963	0.01691	Down	chr2:54365491:54366579:+	1088	Linc
NONRATT015054.2	3.45558	1.78893	0.00178605	Up	chr2:54833249:54834586:+	1159	Exonic
NONRATT015059.2	0.405168	-1.30341	0.0101737	Down	chr2:54943024:54944240:+	1216	Linc
NONRATT015061.2	12.2249	3.61175	0.0250583	Up	chr2:235250575:235257464:-	1188	Exonic
NONRATT015075.2	350.415	8.45292	2.97e-08	Up	chr2:56892628:56893363:+	735	Exonic
NONRATT015146.2	0.360135	-1.47339	0.0306536	Down	chr2:89843057:89844051:+	510	Linc
NONRATT015172.2	4.05185	2.01858	0.00544827	Up	chr2:100677461:100708686:+	769	Exonic
NONRATT015175.2	0.411645	-1.28053	0.0164533	Down	chr2:102313218:102315681:+	2463	Linc
NONRATT015201.2	0.346379	-1.52958	0.00284638	Down	chr2:115793423:115794986:+	1563	Linc
NONRATT015219.2	0.497744	-1.00652	0.0319191	Down	chr2:121062176:121193562:+	1405	Sense No Exonic
NONRATT015220.2	0.333231	-1.5854	0.00137748	Down	chr2:121153324:121193232:+	960	Sense No Exonic
NONRATT015222.2	0.340567	-1.55399	0.0186987	Down	chr2:121191700:121217335:+	584	Sense No Exonic
NONRATT015225.2	26.111	4.70659	0.00103757	Up	chr2:122275295:122275754:+	459	Linc
NONRATT015249.2	0.422116	-1.24429	0.0369392	Down	chr2:127681239:127683205:+	1966	Linc
NONRATT015267.2	0.452852	-1.14289	0.0427407	Down	chr2:137037111:137038813:+	1702	Linc
NONRATT015274.2	7.3744	2.88253	0.00343476	Up	chr2:140530606:140531190:+	584	Exonic
NONRATT015323.2	0.399004	-1.32553	0.0121849	Down	chr2:151314796:151320380:+	1637	Exonic
NONRATT015410.2	0.373698	-1.42006	0.00401091	Down	chr2:187587469:187596345:+	647	Linc
NONRATT015411.2	0.252531	-1.98547	0.0084058	Down	chr2:187594946:187595709:+	763	Linc
NONRATT015437.2	0	#NAME?	0.00856672	Down	chr2:188388180:188389263:+	1083	Exonic
NONRATT015472.2	14.0981	3.81743	0.000328043	Up	chr2:189439815:189450110:+	432	Exonic
NONRATT015474.2	2.92147	1.54669	0.0175945	Up	chr2:189448001:189450111:+	2110	Exonic
NONRATT015500.2	2.85797	1.51499	0.00186453	Up	chr2:193536421:193537238:-	817	Linc
NONRATT015501.2	0	#NAME?	0.0254923	Down	chr2:193504407:193504723:-	316	Linc
NONRATT015566.2	2.49349	1.31816	0.0164708	Up	chr2:196646897:196652432:+	1386	Exonic
NONRATT015608.2	Inf	Inf	0.00441673	Up	chr2:200083818:200084088:+	270	Sense No Exonic
NONRATT015643.2	2.80767	1.48937	0.0345896	Up	chr2:205560881:205563723:+	2842	Linc
NONRATT015666.2	4.33095	2.11468	0.00839557	Up	chr2:207279523:207280030:+	507	Antisense
NONRATT015685.2	0.0330258	-4.92026	1.56e-15	Down	chr2:209850251:209852471:+	2220	Linc
NONRATT015719.2	0.312143	-1.67972	0.00181575	Down	chr2:218975047:218975857:+	810	Linc
NONRATT015813.2	0.495925	-1.01181	0.0451844	Down	chr2:243156832:243158911:+	2079	Linc
NONRATT015840.2	4.6499	2.2172	0.0481006	Up	chr2:250622442:250623152:+	710	Sense No Exonic
NONRATT015872.2	3.65077	1.8682	0.0204293	Up	chr2:257439509:257445096:+	1045	Exonic
NONRATT015890.2	Inf	Inf	0.0132931	Up	chr2:257604710:257629061:+	408	Linc
NONRATT015900.2	0.44273	-1.1755	0.0155243	Down	chr2:263650888:263653318:+	2430	Linc
NONRATT015909.2	0.382235	-1.38747	0.0259044	Down	chr2:266315012:266316297:+	1285	Exonic
NONRATT015918.2	0.00995396	-6.65051	0.00339351	Down	chr2:1791288:1791544:-	256	Linc
NONRATT015923.2	0.467912	-1.09569	0.0330624	Down	chr2:2764476:2767418:-	2942	Antisense
NONRATT015952.2	9.80291	3.29321	0.0446317	Up	chr2:18491397:18492473:-	1076	Exonic
NONRATT015977.2	0.343563	-1.54135	0.0184008	Down	chr2:24022838:24024642:-	1804	Linc
NONRATT015995.2	0.499975	-1.00007	0.0446139	Down	chr2:26495771:26496229:-	458	Linc
NONRATT016062.2	2.10799	1.07587	0.0383584	Up	chr2:33880481:33884520:-	2030	Linc
NONRATT016077.2	0.122015	-3.03487	2.67e-08	Down	chr2:35072069:35074334:-	2265	Linc
NONRATT016094.2	0.218463	-2.19454	0.0275436	Down	chr2:40962785:40970607:-	784	Antisense
NONRATT016095.2	0.406139	-1.29996	0.00702497	Down	chr2:41559962:41564639:-	4677	Linc
NONRATT016141.2	2.50567	1.3252	0.0255677	Up	chr2:47123672:47125905:-	2233	Linc
NONRATT016212.2	6.95905	2.79889	0.00826812	Up	chr2:84355592:84357390:-	1798	Linc
NONRATT016224.2	0.398593	-1.32701	0.0475347	Down	chr2:88402887:88403723:-	836	Exonic
NONRATT016243.2	0.185734	-2.42869	4.92e-06	Down	chr2:96593184:96608200:-	3678	Exonic
NONRATT016279.2	10.0583	3.33032	0.00110531	Up	chr2:113109942:113112476:-	2534	Linc
NONRATT016317.2	0.412389	-1.27792	0.00792643	Down	chr2:119324086:119325491:-	1405	Linc
NONRATT016318.2	0.431383	-1.21296	0.0113831	Down	chr2:119327478:119329234:-	1756	Linc
NONRATT016414.2	2.63802	1.39946	0.0078691	Up	chr2:147574093:147576787:-	2694	Linc
NONRATT016428.2	4.9441	2.30571	0.0374063	Up	chr2:152785959:152787842:-	889	Exonic
NONRATT016451.2	4.34738	2.12015	0.00179827	Up	chr2:157751227:157751952:-	469	Exonic
NONRATT016452.2	3.20808	1.68171	0.00196619	Up	chr2:157751280:157752154:-	874	Exonic
NONRATT016492.2	0.37961	-1.39741	0.0385139	Down	chr2:179587441:179589810:-	1977	Exonic
NONRATT016509.2	15.4132	3.94609	0.0292474	Up	chr2:182994013:183030452:-	404	Linc
NONRATT016569.2	Inf	Inf	0.000124026	Up	chr2:187847692:187848323:-	631	Exonic
NONRATT016576.2	0.0332094	-4.91226	1.25e-18	Down	chr2:188112300:188113582:-	1282	Linc
NONRATT016677.2	0.363252	-1.46096	0.0119111	Down	chr2:198014386:198017094:-	531	Exonic
NONRATT016700.2	0.431567	-1.21234	0.0338976	Down	chr2:199908221:199919454:-	978	Exonic
NONRATT016705.2	0	#NAME?	2.42e-06	Down	chr2:200484245:200484612:-	367	Exonic
NONRATT016724.2	12.5098	3.64499	0.00326266	Up	chr2:204699167:204699867:-	700	Linc
NONRATT016743.2	7.23416	2.85482	0.0204029	Up	chr2:207277092:207278275:-	1083	Exonic
NONRATT016745.2	21.8693	4.45084	0.0405454	Up	chr2:207307442:207308644:-	879	Exonic
NONRATT016759.2	0.0474736	-4.39673	0.0309188	Down	chr2:210723416:210724248:-	747	Exonic
NONRATT016850.2	5.16207	2.36795	5.62e-05	Up	chr2:227718790:227719556:-	766	Linc
NONRATT016861.2	0.428529	-1.22254	0.0170319	Down	chr2:231224642:231226057:-	1415	Linc
NONRATT016879.2	Inf	Inf	0.00178317	Up	chr2:236458275:236460686:-	815	Exonic
NONRATT016957.2	Inf	Inf	0.0153054	Up	chr2:257490731:257493652:-	2921	Linc
NONRATT016958.2	0.215937	-2.21131	0.000278857	Down	chr2:257544763:257546904:-	335	Linc
NONRATT016972.2	3.22177	1.68785	0.00632941	Up	chr2:260111269:260115575:-	923	Exonic
NONRATT016973.2	3.84453	1.94281	0.00083527	Up	chr2:260111542:260113171:-	1092	Exonic
NONRATT016975.2	2.29485	1.1984	0.0220153	Up	chr2:260113856:260116492:-	1387	Exonic
NONRATT017009.2	0.0836255	-3.57991	0.0255298	Down	chr20:2004840:2005516:+	676	Sense No Exonic
NONRATT017052.2	34.7086	5.11722	0.0128064	Up	chr20:3396167:3396895:+	728	Antisense
NONRATT017169.2	2.20494	1.14074	0.0357935	Up	chr20:6294082:6294982:+	900	Exonic
NONRATT017191.2	Inf	Inf	0.00190618	Up	chr20:7133041:7139058:+	667	Exonic
NONRATT017194.2	9.41942	3.23564	0.0329269	Up	chr20:7133099:7140154:+	1558	Exonic
NONRATT017195.2	7.0957	2.82694	8.55e-07	Up	chr20:7133102:7139519:+	922	Exonic
NONRATT017198.2	12.5287	3.64717	1.49e-05	Up	chr20:7135161:7135900:+	727	Linc
NONRATT017203.2	9.14388	3.19281	1.44e-06	Up	chr20:7417057:7427581:+	769	Exonic
NONRATT017220.2	9.02124	3.17333	0.000642288	Up	chr20:8169556:8170033:+	477	Exonic
NONRATT017221.2	0	#NAME?	0.00531023	Down	chr20:8276855:8278382:+	1527	Exonic
NONRATT017249.2	5.49896	2.45916	5.48e-05	Up	chr20:10356799:10358928:+	2129	Linc
NONRATT017282.2	8.16401	3.02928	0.0188072	Up	chr20:12324022:12324760:+	738	Sense No Exonic
NONRATT017301.2	0.154322	-2.69598	0.00138429	Down	chr20:13741349:13746366:+	1138	Linc
NONRATT017302.2	0.30062	-1.73398	0.0173944	Down	chr20:13760716:13761526:+	810	Exonic
NONRATT017329.2	0.397834	-1.32976	0.0224076	Down	chr20:20439096:20439387:+	291	Sense No Exonic
NONRATT017345.2	3.44155	1.78306	0.0470688	Up	chr20:21839392:21841227:+	390	Exonic
NONRATT017346.2	2.4032	1.26496	0.0112746	Up	chr20:21882005:21884737:+	2732	Linc
NONRATT017350.2	0.444195	-1.17073	0.0260546	Down	chr20:22082234:22084481:+	2247	Exonic
NONRATT017382.2	0.383764	-1.38171	0.00416733	Down	chr20:29680213:29681723:+	1510	Linc
NONRATT017533.2	8.44618	3.0783	0.000855064	Up	chr20:3795792:3796279:-	487	Exonic
NONRATT017553.2	3.14052	1.651	0.00506799	Up	chr20:4694629:4696333:-	687	Exonic
NONRATT017560.2	4.74161	2.24538	0.00838805	Up	chr20:4872633:4873955:-	741	Sense No Exonic
NONRATT017562.2	3.96567	1.98756	0.0053181	Up	chr20:4887668:4906481:-	772	Sense No Exonic
NONRATT017564.2	6.27657	2.64998	0.0482509	Up	chr20:4899999:4901185:-	686	Sense No Exonic
NONRATT017594.2	4.83437	2.27333	0.00476157	Up	chr20:5532027:5532675:-	406	Exonic
NONRATT017611.2	Inf	Inf	0.0190073	Up	chr20:6853841:6854352:-	511	Sense No Exonic
NONRATT017613.2	31.4823	4.97647	0.000136482	Up	chr20:6856004:6858683:-	396	Sense No Exonic
NONRATT017621.2	5.48425	2.45529	0.00606321	Up	chr20:7216707:7219278:-	964	Exonic
NONRATT017622.2	2.48822	1.31511	0.0315923	Up	chr20:7219443:7220293:-	850	Exonic
NONRATT017635.2	3.28301	1.71502	0.036773	Up	chr20:8428003:8429214:-	1175	Linc
NONRATT017671.2	23.1764	4.53458	0.0489023	Up	chr20:11783417:11784083:-	666	Exonic
NONRATT017693.2	2.47287	1.30619	0.0253081	Up	chr20:14418804:14419382:-	578	Linc
NONRATT017754.2	3.48335	1.80048	0.00558728	Up	chr20:32260590:32269131:-	1577	Exonic
NONRATT017764.2	2.52658	1.33718	0.0036721	Up	chr20:32940703:32941685:-	982	Linc
NONRATT017779.2	0.115845	-3.10973	0.0269123	Down	chr20:37662363:37666498:-	666	Linc
NONRATT017791.2	25.6103	4.67865	0.0201902	Up	chr20:42751576:42752256:-	442	Linc
NONRATT017817.2	4.22607	2.07932	0.036084	Up	chr20:45390349:45390828:-	479	Exonic
NONRATT017882.2	3.93867	1.97771	6.59e-05	Up	chr3:2626064:2629253:+	2039	Exonic
NONRATT017883.2	3.17644	1.66741	0.0012855	Up	chr3:2627994:2629338:+	1241	Exonic
NONRATT017969.2	0.164796	-2.60125	0.0111914	Down	chr3:8356683:8359420:+	815	Exonic
NONRATT017989.2	2.514	1.32998	0.0330697	Up	chr3:8627452:8630318:+	753	Exonic
NONRATT017996.2	Inf	Inf	0.0433658	Up	chr3:8652746:8656476:+	1066	Exonic
NONRATT018011.2	Inf	Inf	0.0022797	Up	chr3:8992989:8993226:+	237	Exonic
NONRATT018052.2	5.89713	2.56001	0.00762394	Up	chr3:11815201:11816735:+	1091	Antisense
NONRATT018053.2	7.24401	2.85679	0.00300544	Up	chr3:11817272:11818146:+	874	Antisense
NONRATT018055.2	5.44611	2.44523	0.000514949	Up	chr3:12009543:12011950:+	1971	Exonic
NONRATT018056.2	7.84085	2.97101	0.0213559	Up	chr3:12009595:12010715:+	1120	Exonic
NONRATT018085.2	Inf	Inf	0.0314693	Up	chr3:20303808:20304268:+	340	Sense No Exonic
NONRATT018129.2	0.435976	-1.19768	0.0121456	Down	chr3:35230840:35257416:+	4096	Exonic
NONRATT018144.2	0.121872	-3.03656	0.0367109	Down	chr3:39967445:40038636:+	614	Exonic
NONRATT018214.2	13.5494	3.76016	0.0166254	Up	chr3:55646737:55647523:+	786	Linc
NONRATT018258.2	0.412095	-1.27895	0.0376685	Down	chr3:58755002:58843358:+	447	Linc
NONRATT018267.2	0.293507	-1.76853	0.00964774	Down	chr3:61621684:61622354:+	670	Exonic
NONRATT018275.2	3.5788	1.83947	0.0325216	Up	chr3:62486952:62491356:+	4317	Exonic
NONRATT018276.2	3.28756	1.71702	0.00739505	Up	chr3:62486959:62488068:+	929	Exonic
NONRATT018316.2	0.126285	-2.98524	5.88e-09	Down	chr3:71203573:71205953:+	2380	Linc
NONRATT018376.2	0.396172	-1.3358	0.00956296	Down	chr3:81852437:81853545:+	1108	Exonic
NONRATT018377.2	0.436809	-1.19492	0.0207485	Down	chr3:81853557:81854605:+	1048	Linc
NONRATT018400.2	0.480632	-1.057	0.029652	Down	chr3:92670321:92674698:+	4377	Linc
NONRATT018427.2	0.202848	-2.30153	0.0257518	Down	chr3:96023066:96024389:+	359	Linc
NONRATT018479.2	0.319913	-1.64425	0.0260854	Down	chr3:111013696:111016394:+	1013	Exonic
NONRATT018484.2	0.231678	-2.10981	0.00104292	Down	chr3:111406335:111410585:+	4250	Linc
NONRATT018530.2	17.8358	4.1567	0.0164723	Up	chr3:113977183:113989424:+	302	Exonic
NONRATT018531.2	4.44868	2.15338	0.0282789	Up	chr3:114087294:114087980:+	686	Exonic
NONRATT018538.2	13.5463	3.75983	0.00826343	Up	chr3:114366647:114646999:+	559	Exonic
NONRATT018585.2	Inf	Inf	0.00101516	Up	chr3:121828973:121829665:-	692	Exonic
NONRATT018593.2	5.83848	2.54559	0.00506375	Up	chr3:120899193:120954909:-	552	Linc
NONRATT018611.2	0.220552	-2.18081	0.0279168	Down	chr3:123513145:123513565:+	420	Exonic
NONRATT018641.2	7.16131	2.84022	0.00157821	Up	chr3:126335124:126335711:+	587	Linc
NONRATT018663.2	0.388993	-1.36218	0.00741646	Down	chr3:137924125:137925612:+	1487	Linc
NONRATT018671.2	3.21351	1.68415	0.0463291	Up	chr3:138749992:138750723:+	723	Sense No Exonic
NONRATT018717.2	4.33595	2.11635	0.00165026	Up	chr3:147058193:147061661:+	1218	Exonic
NONRATT018828.2	4.23457	2.08222	0.0071816	Up	chr3:154850104:154851142:-	365	Linc
NONRATT018829.2	5.04844	2.33584	0.000197464	Up	chr3:154845325:154848947:-	489	Linc
NONRATT018830.2	4.73569	2.24357	0.0131679	Up	chr3:154845873:154846749:-	876	Linc
NONRATT018861.2	0.33882	-1.56141	0.0245343	Down	chr3:159842136:159843237:+	552	Exonic
NONRATT018896.2	2.34477	1.22945	0.0254794	Up	chr3:163815275:163817913:+	487	Antisense
NONRATT018897.2	4.87579	2.28564	0.000700147	Up	chr3:163816903:163817911:+	753	Antisense
NONRATT018910.2	7.60889	2.92769	0.00607168	Up	chr3:164665508:164697019:+	581	Exonic
NONRATT018913.2	4.00236	2.00085	0.00732809	Up	chr3:164714126:164714641:+	515	Linc
NONRATT018946.2	0.424044	-1.23771	0.0127741	Down	chr3:171872334:171874650:+	2316	Linc
NONRATT018955.2	0	#NAME?	0.00286022	Down	chr3:173130357:173130810:+	453	Linc
NONRATT018957.2	0.0753456	-3.73033	0.00170185	Down	chr3:176117544:176120260:+	702	Linc
NONRATT019014.2	2.2457	1.16716	0.0406486	Up	chr3:727598:727982:-	384	Linc
NONRATT019041.2	0.464764	-1.10543	0.0417372	Down	chr3:2678989:2680478:-	1155	Exonic
NONRATT019056.2	0.398037	-1.32902	0.0291237	Down	chr3:2843050:2845575:-	1636	Exonic
NONRATT019094.2	5.40097	2.43322	0.0315261	Up	chr3:4090251:4091552:-	1301	Antisense
NONRATT019098.2	2.62357	1.39153	0.0211965	Up	chr3:4092497:4094867:-	813	Linc
NONRATT019105.2	0.394657	-1.34133	0.0400778	Down	chr3:5656399:5657353:-	954	Linc
NONRATT019123.2	0.291936	-1.77628	0.00430753	Down	chr3:8406781:8408275:-	496	Linc
NONRATT019126.2	0	#NAME?	0.0054788	Down	chr3:8662578:8665665:-	1688	Exonic
NONRATT019127.2	0.00294199	-8.40899	7.61e-18	Down	chr3:8678461:8690286:-	411	Exonic
NONRATT019143.2	4.93639	2.30346	0.000102464	Up	chr3:9035274:9035878:-	604	Linc
NONRATT019147.2	Inf	Inf	0.000120064	Up	chr3:9727403:9728298:-	493	Exonic
NONRATT019177.2	0.373945	-1.4191	0.0124941	Down	chr3:11338308:11339223:-	915	Exonic
NONRATT019192.2	0.391466	-1.35304	0.0361663	Down	chr3:11972856:11974583:-	405	Exonic
NONRATT019202.2	0.333758	-1.58312	0.00543122	Down	chr3:12180304:12181564:-	1260	Linc
NONRATT019203.2	0.270309	-1.88732	0.00626929	Down	chr3:12182045:12182696:-	651	Linc
NONRATT019210.2	0.140981	-2.82643	0.000139355	Down	chr3:13241022:13270156:-	1814	Exonic
NONRATT019232.2	31.1965	4.96331	0.00774737	Up	chr3:14648475:14648808:-	333	Sense No Exonic
NONRATT019248.2	0.220747	-2.17953	0.000716893	Down	chr3:21827113:21839068:-	694	Exonic
NONRATT019275.2	0.417539	-1.26002	0.0133202	Down	chr3:29993488:29996803:-	709	Linc
NONRATT019306.2	0.395525	-1.33816	0.0124303	Down	chr3:44078500:44079340:-	840	Linc
NONRATT019309.2	0.165213	-2.5976	0.00158544	Down	chr3:44266003:44267358:-	1355	Linc
NONRATT019326.2	2.92725	1.54955	0.00456223	Up	chr3:46800670:46802170:-	1500	Linc
NONRATT019385.2	0.470416	-1.08799	0.0436571	Down	chr3:60555516:60555993:-	477	Exonic
NONRATT019414.2	0.391379	-1.35336	0.0173807	Down	chr3:66801110:66803169:-	2059	Linc
NONRATT019450.2	2.98478	1.57763	0.0420942	Up	chr3:79279074:79390956:-	1794	Exonic
NONRATT019484.2	8.96596	3.16446	3e-09	Up	chr3:82324818:82325645:-	533	Exonic
NONRATT019485.2	5.09293	2.3485	0.0134313	Up	chr3:82325772:82327681:-	822	Exonic
NONRATT019501.2	4.8889	2.28951	0.0486722	Up	chr3:88841736:88842237:-	501	Linc
NONRATT019513.2	22.7016	4.50472	1.17e-06	Up	chr3:92725185:92726335:-	1150	Exonic
NONRATT019537.2	11.3947	3.51029	0.0184045	Up	chr3:94779935:94781824:-	1889	Linc
NONRATT019538.2	84.3592	6.39847	0.00607316	Up	chr3:94783859:94798468:-	1788	Exonic
NONRATT019539.2	61.568	5.94411	6.98e-05	Up	chr3:94794919:94808192:-	390	Exonic
NONRATT019565.2	Inf	Inf	0.012342	Up	chr3:103856169:103857088:-	617	Exonic
NONRATT019586.2	11.6214	3.53871	0.00567469	Up	chr3:110070229:110070603:-	374	Sense No Exonic
NONRATT019613.2	0	#NAME?	0.000261095	Down	chr3:112677934:112680318:-	2384	Linc
NONRATT019621.2	0.431222	-1.2135	0.0298366	Down	chr3:113156627:113157685:-	1058	Linc
NONRATT019628.2	2.39723	1.26137	0.0297973	Up	chr3:113369346:113369864:-	518	Exonic
NONRATT019675.2	2.99807	1.58403	0.0020376	Up	chr3:121736865:121739165:+	1617	Exonic
NONRATT019676.2	4.34799	2.12035	0.00233894	Up	chr3:121737060:121738539:+	1479	Exonic
NONRATT019678.2	0.333264	-1.58526	0.00285253	Down	chr3:121624067:121626581:+	2514	Linc
NONRATT019736.2	6.60873	2.72437	0.000969196	Up	chr3:138384948:138386869:-	702	Exonic
NONRATT019738.2	0.405381	-1.30265	0.00689781	Down	chr3:138621388:138623413:-	2025	Linc
NONRATT019761.2	0.369267	-1.43727	0.00313145	Down	chr3:143016929:143017696:-	767	Linc
NONRATT019804.2	25.7522	4.68662	0.000188179	Up	chr3:147813469:147814053:-	584	Linc
NONRATT019870.2	23.833	4.57489	0.0113991	Up	chr3:152810689:152811109:+	420	Sense No Exonic
NONRATT019877.2	0.177908	-2.4908	0.00830704	Down	chr3:155264218:155267001:+	2783	Linc
NONRATT019883.2	0.468345	-1.09436	0.0348533	Down	chr3:154863061:154870101:+	1129	Exonic
NONRATT019885.2	0.0452113	-4.46717	0.0131893	Down	chr3:154863433:154864461:+	332	Exonic
NONRATT019896.2	7.93145	2.98758	0.00108646	Up	chr3:156557061:156617981:-	702	Linc
NONRATT019988.2	0.437091	-1.19399	0.0455502	Down	chr3:163850376:163851904:-	1528	Exonic
NONRATT019992.2	2.03437	1.02458	0.0210231	Up	chr3:164039727:164042648:-	2921	Exonic
NONRATT020006.2	24.0616	4.58866	0.0122197	Up	chr3:165672194:165672582:-	388	Linc
NONRATT020009.2	0.261161	-1.93699	0.0417286	Down	chr3:166460117:166461874:-	499	Linc
NONRATT020080.2	0.239887	-2.05957	0.0297592	Down	chr3:175416314:175418528:+	734	Linc
NONRATT020083.2	0.479382	-1.06075	0.0463032	Down	chr3:173962126:173963500:+	1374	Linc
NONRATT020092.2	3.02546	1.59716	0.00228383	Up	chr4:695547:697850:+	2303	Linc
NONRATT020102.2	Inf	Inf	0.0066859	Up	chr4:2505906:2606267:+	900	Linc
NONRATT020129.2	0.237858	-2.07183	0.0273561	Down	chr4:7262278:7263631:+	694	Sense No Exonic
NONRATT020160.2	7.78709	2.96108	0.0151792	Up	chr4:10677171:10677730:+	559	Exonic
NONRATT020161.2	32.375	5.01681	0.00139955	Up	chr4:10701208:10702390:+	1182	Exonic
NONRATT020180.2	0.265677	-1.91225	0.000806824	Down	chr4:21567779:21568967:+	1188	Antisense
NONRATT020189.2	0.0284956	-5.13312	0.0164769	Down	chr4:22700905:22735234:+	312	Sense No Exonic
NONRATT020204.2	0.377035	-1.40723	0.00740408	Down	chr4:25945172:25978768:+	665	Exonic
NONRATT020233.2	0	#NAME?	0.0143276	Down	chr4:34238472:34245602:+	1575	Exonic
NONRATT020281.2	0.294287	-1.76471	0.00183521	Down	chr4:50090115:50090984:+	869	Exonic
NONRATT020296.2	17.4479	4.12498	2.54e-10	Up	chr4:56547733:56550582:+	906	Linc
NONRATT020328.2	0.172236	-2.53754	0.0182805	Down	chr4:58626129:58627586:+	230	Linc
NONRATT020346.2	27.216	4.76639	1.43e-06	Up	chr4:61782087:61784918:+	489	Exonic
NONRATT020382.2	0.337065	-1.5689	0.00225974	Down	chr4:66420869:66421654:+	665	Exonic
NONRATT020391.2	0.0121793	-6.35942	0.0108935	Down	chr4:68055526:68059250:+	3724	Exonic
NONRATT020421.2	0.412412	-1.27784	0.0163628	Down	chr4:77026456:77027905:+	1449	Linc
NONRATT020433.2	0	#NAME?	0.00427134	Down	chr4:78024886:78025288:+	402	Linc
NONRATT020490.2	0	#NAME?	0.0189006	Down	chr4:85009649:85083777:+	650	Exonic
NONRATT020497.2	6.77363	2.75993	0.00110849	Up	chr4:85349618:85351645:+	2027	Exonic
NONRATT020524.2	0.335324	-1.57637	0.0349152	Down	chr4:95442968:95443525:+	557	Linc
NONRATT020559.2	Inf	Inf	0.00168465	Up	chr4:100214631:100215827:+	1196	Linc
NONRATT020567.2	15.4289	3.94756	0.00961937	Up	chr4:100414248:100415795:+	411	Exonic
NONRATT020577.2	0	#NAME?	0.00085518	Down	chr4:101208928:101210692:+	427	Exonic
NONRATT020593.2	3.41996	1.77398	0.00840275	Up	chr4:111942208:111942682:+	474	Linc
NONRATT020621.2	3.0847	1.62513	0.0205389	Up	chr4:115024913:115028992:+	355	Exonic
NONRATT020644.2	Inf	Inf	0.0356008	Up	chr4:117222858:117223581:+	246	Exonic
NONRATT020650.2	3.88303	1.95718	0.00149292	Up	chr4:117660426:117660870:+	444	Linc
NONRATT020656.2	4.3738	2.12889	0.0449335	Up	chr4:118207875:118208562:+	687	Exonic
NONRATT020674.2	0	#NAME?	0.0189076	Down	chr4:118787038:118792562:+	1725	Exonic
NONRATT020695.2	0.29403	-1.76597	0.0037418	Down	chr4:119841946:119845404:+	421	Exonic
NONRATT020728.2	Inf	Inf	0.000825931	Up	chr4:124803090:124815325:-	398	Exonic
NONRATT020729.2	15.526	3.95661	0.0103507	Up	chr4:124802977:124803502:-	525	Exonic
NONRATT020765.2	2.28003	1.18905	0.0142149	Up	chr4:140709242:140709947:+	705	Exonic
NONRATT020813.2	2.92536	1.54862	0.00285911	Up	chr4:162941683:162943981:+	1906	Exonic
NONRATT020816.2	9.149	3.19361	0.0326055	Up	chr4:163162284:163170470:+	514	Exonic
NONRATT020841.2	Inf	Inf	2.97e-05	Up	chr4:149958231:149976938:+	424	Exonic
NONRATT020883.2	Inf	Inf	3.43e-05	Up	chr4:156107623:156131102:+	421	Exonic
NONRATT020967.2	0.0700953	-3.83454	0.0102086	Down	chr4:159236331:159236754:-	423	Linc
NONRATT021007.2	2.08784	1.06201	0.0298207	Up	chr4:176040917:176440638:+	505	Antisense
NONRATT021012.2	2.10374	1.07296	0.0341411	Up	chr4:176440208:176441148:+	940	Antisense
NONRATT021045.2	0.124091	-3.01053	0.0164331	Down	chr4:180961233:180984423:+	494	Exonic
NONRATT021081.2	3.33972	1.73973	0.000142362	Up	chr4:3121018:3122030:-	1012	Linc
NONRATT021086.2	0.0318389	-4.97306	0.00547424	Down	chr4:4440512:4473278:-	611	Sense No Exonic
NONRATT021115.2	6.77468	2.76015	0.00931221	Up	chr4:7818642:7822858:-	1387	Antisense
NONRATT021130.2	0	#NAME?	0.00340476	Down	chr4:9908834:9909395:-	341	Exonic
NONRATT021140.2	14.1567	3.82342	0.0376222	Up	chr4:10425641:10427159:-	718	Exonic
NONRATT021150.2	0.428499	-1.22264	0.0178934	Down	chr4:15706968:15709706:-	2738	Linc
NONRATT021161.2	0	#NAME?	0.0111512	Down	chr4:17314740:17315458:-	718	Linc
NONRATT021172.2	0.368937	-1.43855	0.0392013	Down	chr4:22617676:22618402:-	726	Sense No Exonic
NONRATT021179.2	20.6621	4.36892	0.0219215	Up	chr4:25392054:25392618:-	559	Linc
NONRATT021201.2	4.64337	2.21517	0.031561	Up	chr4:27776823:27778424:-	1601	Linc
NONRATT021202.2	3.94166	1.9788	0.0129461	Up	chr4:27778686:27779357:-	671	Linc
NONRATT021203.2	4.48526	2.16519	0.0035098	Up	chr4:27781519:27783678:-	2159	Linc
NONRATT021222.2	51.2198	5.67863	0.0175117	Up	chr4:31134632:31135443:-	811	Linc
NONRATT021230.2	0.399032	-1.32542	0.0343152	Down	chr4:33737804:33739240:-	1436	Linc
NONRATT021275.2	0.420484	-1.24988	0.0214014	Down	chr4:52345600:52347008:-	1408	Exonic
NONRATT021277.2	0.474477	-1.07559	0.0498918	Down	chr4:52349905:52350583:-	678	Exonic
NONRATT021343.2	7.4075	2.88899	0.0324986	Up	chr4:66015808:66016258:-	450	Linc
NONRATT021410.2	0.406194	-1.29976	0.0313562	Down	chr4:79931361:79933178:-	1817	Linc
NONRATT021456.2	0.432377	-1.20964	0.0127144	Down	chr4:89149481:89150717:-	1236	Exonic
NONRATT021479.2	3.18548	1.67151	0.00815412	Up	chr4:99250835:99257480:-	3081	Linc
NONRATT021481.2	Inf	Inf	0.00421665	Up	chr4:99535667:99546960:-	711	Exonic
NONRATT021491.2	2.16712	1.11578	0.0146271	Up	chr4:100221870:100223870:-	1477	Exonic
NONRATT021496.2	3.97353	1.99042	0.00700262	Up	chr4:100231317:100231774:-	457	Exonic
NONRATT021536.2	0.372823	-1.42344	0.0387571	Down	chr4:114853649:114870733:-	494	Exonic
NONRATT021556.2	0.439542	-1.18593	0.0176131	Down	chr4:116993297:116994278:-	981	Linc
NONRATT021564.2	0.375386	-1.41355	0.0207469	Down	chr4:117253303:117254143:-	840	Linc
NONRATT021594.2	18.9132	4.24132	5.87e-05	Up	chr4:119750314:119756702:-	442	Exonic
NONRATT021595.2	2.51461	1.33033	0.043995	Up	chr4:119755387:119756966:-	1579	Exonic
NONRATT021627.2	20.1306	4.33132	0.0223441	Up	chr4:123671730:123713347:-	833	Exonic
NONRATT021630.2	46.3111	5.53329	3.45e-05	Up	chr4:124749186:124749866:+	680	Antisense
NONRATT021643.2	0.328571	-1.60572	0.0167654	Down	chr4:125724877:125734871:-	400	Exonic
NONRATT021670.2	8.22979	3.04085	0.0189953	Up	chr4:131377690:131378713:-	1023	Sense No Exonic
NONRATT021675.2	50.6543	5.66261	0.00610589	Up	chr4:132166965:132171150:-	801	Exonic
NONRATT021678.2	0.314379	-1.66942	0.0069556	Down	chr4:133008973:133009449:-	476	Linc
NONRATT021679.2	0.205524	-2.28262	0.000302834	Down	chr4:133011963:133013176:-	565	Linc
NONRATT021694.2	0.411656	-1.28049	0.0167349	Down	chr4:144634794:144636302:-	1508	Linc
NONRATT021699.2	0.367851	-1.4428	0.0103735	Down	chr4:145113962:145114681:-	719	Linc
NONRATT021700.2	0.322756	-1.63148	0.00967605	Down	chr4:145115605:145115986:-	381	Linc
NONRATT021725.2	4.63652	2.21304	0.00352193	Up	chr4:147717105:147719044:-	1132	Exonic
NONRATT021738.2	Inf	Inf	0.00236122	Up	chr4:162987226:162991121:-	853	Linc
NONRATT021763.2	Inf	Inf	2.38e-06	Up	chr4:150167080:150168545:-	225	Exonic
NONRATT021769.2	2.4571	1.29696	0.0104265	Up	chr4:150515483:150516713:-	1230	Exonic
NONRATT021828.2	5.11797	2.35557	0.000765063	Up	chr4:156159801:156160453:-	652	Linc
NONRATT021860.2	4.54147	2.18316	0.043666	Up	chr4:157824078:157825210:-	1132	Exonic
NONRATT021863.2	4.30134	2.10479	0.0456893	Up	chr4:157978266:157979021:-	755	Exonic
NONRATT021865.2	0.43208	-1.21063	0.0100598	Down	chr4:159185629:159188308:-	2679	Linc
NONRATT021867.2	8.86884	3.14875	0.000286212	Up	chr4:161540106:161541029:-	923	Linc
NONRATT021904.2	0.333944	-1.58232	0.0179796	Down	chr4:159286127:159288014:+	1887	Antisense
NONRATT021923.2	4.96457	2.31167	0.0164725	Up	chr4:170856772:170860212:-	2050	Exonic
NONRATT021956.2	0.322112	-1.63436	0.0154901	Down	chr4:177058612:177059432:-	820	Linc
NONRATT021991.2	0.299999	-1.73697	0.00142421	Down	chr4:182620131:182622047:-	1916	Linc
NONRATT022002.2	0.374706	-1.41617	0.0440272	Down	chr5:189712:190822:+	846	Linc
NONRATT022007.2	0.329845	-1.60014	0.0106394	Down	chr5:2058547:2059552:+	1005	Exonic
NONRATT022010.2	0.382786	-1.38539	0.00607056	Down	chr5:2400158:2497916:+	1526	Exonic
NONRATT022022.2	0.28161	-1.82823	0.00461169	Down	chr5:4513520:4515112:+	1592	Linc
NONRATT022043.2	2.92549	1.54868	0.0109491	Up	chr5:8978017:8980011:+	703	Antisense
NONRATT022147.2	0.399414	-1.32404	0.0195681	Down	chr5:36684567:36688935:+	1361	Linc
NONRATT022201.2	0.0635046	-3.97699	2.47e-09	Down	chr5:58157796:58159069:+	434	Exonic
NONRATT022229.2	3.58958	1.84382	0.000160281	Up	chr5:59446870:59448053:+	1183	Linc
NONRATT022294.2	7.05438	2.81852	4.28e-08	Up	chr5:74956510:74985789:+	4463	Exonic
NONRATT022298.2	0.434932	-1.20114	0.0240417	Down	chr5:76106068:76107252:+	1184	Linc
NONRATT022346.2	0.15501	-2.68956	1.9e-05	Down	chr5:100650511:100688184:+	1378	Linc
NONRATT022361.2	0.455213	-1.13539	0.0200979	Down	chr5:103654453:103655716:+	947	Linc
NONRATT022362.2	4.61959	2.20776	0.010761	Up	chr5:104362672:104461580:+	493	Linc
NONRATT022365.2	Inf	Inf	0.00268042	Up	chr5:104753164:104753863:+	699	Linc
NONRATT022393.2	0.0315217	-4.98751	0.0122744	Down	chr5:114027336:114030520:+	721	Sense No Exonic
NONRATT022400.2	0.416299	-1.26431	0.020924	Down	chr5:116754769:116755922:+	1153	Linc
NONRATT022431.2	5.44053	2.44375	0.00389128	Up	chr5:122100821:122101412:+	591	Exonic
NONRATT022479.2	8.24745	3.04395	0.0189802	Up	chr5:128688561:128691052:+	663	Exonic
NONRATT022510.2	8.1153	3.02064	5.53e-06	Up	chr5:134120226:134120993:+	767	Linc
NONRATT022513.2	0.419758	-1.25237	0.0181348	Down	chr5:134663842:134665195:+	1353	Exonic
NONRATT022514.2	3.70734	1.89038	0.00510013	Up	chr5:134685836:134688962:+	803	Sense No Exonic
NONRATT022551.2	0	#NAME?	0.00459431	Down	chr5:136406129:136444215:+	807	Linc
NONRATT022556.2	0.223525	-2.16149	0.0390484	Down	chr5:136700373:136701122:+	749	Sense No Exonic
NONRATT022614.2	0.310964	-1.68518	0.0229662	Down	chr5:143096307:143103232:+	467	Exonic
NONRATT022641.2	0.0371402	-4.75087	0.00998745	Down	chr5:145304144:145304535:+	391	Exonic
NONRATT022652.2	9.02374	3.17373	0.000122121	Up	chr5:146933586:146941224:+	613	Exonic
NONRATT022653.2	7.23996	2.85598	0.000101817	Up	chr5:146946732:146947772:+	1040	Linc
NONRATT022655.2	6.15035	2.62067	0.00753294	Up	chr5:147401683:147403579:+	1896	Exonic
NONRATT022734.2	55.7109	5.79989	2.58e-05	Up	chr5:153532200:153533094:+	894	Linc
NONRATT022742.2	2.28845	1.19437	0.035239	Up	chr5:154216443:154217976:+	1533	Linc
NONRATT022764.2	8.14509	3.02593	0.000101439	Up	chr5:156069450:156070667:+	531	Exonic
NONRATT022775.2	7.46536	2.90021	0.0267266	Up	chr5:156401129:156401531:+	402	Sense No Exonic
NONRATT022805.2	4.0257	2.00924	0.0260308	Up	chr5:159281183:159286941:+	844	Antisense
NONRATT022806.2	5.17648	2.37197	3.73e-06	Up	chr5:159282867:159284155:+	1288	Antisense
NONRATT022897.2	0.357263	-1.48494	0.00740332	Down	chr5:169567483:169568888:+	1405	Linc
NONRATT022931.2	0.0968001	-3.36885	0.000226358	Down	chr5:173188792:173189497:+	705	Linc
NONRATT022969.2	14.2073	3.82856	1.98e-10	Up	chr5:786864:787840:-	976	Linc
NONRATT023006.2	6.50211	2.70091	0.000139324	Up	chr5:9658753:9659024:-	271	Linc
NONRATT023044.2	0.42809	-1.22401	0.0140818	Down	chr5:22709153:22710718:-	1565	Linc
NONRATT023047.2	0.375702	-1.41234	0.00429587	Down	chr5:22753842:22755727:-	1885	Linc
NONRATT023097.2	0.428746	-1.2218	0.0210663	Down	chr5:33603018:33604487:-	1469	Antisense
NONRATT023112.2	0.305263	-1.71187	0.000505404	Down	chr5:40022916:40025773:-	2857	Linc
NONRATT023194.2	Inf	Inf	0.000379845	Up	chr5:59034946:59035315:-	369	Exonic
NONRATT023227.2	0.430504	-1.2159	0.0308596	Down	chr5:62276780:62278856:-	2076	Exonic
NONRATT023250.2	0.438237	-1.19022	0.0228931	Down	chr5:73994587:73995745:-	1158	Linc
NONRATT023284.2	9.87156	3.30328	0.031263	Up	chr5:76681887:76682624:-	737	Exonic
NONRATT023331.2	0.452021	-1.14554	0.0408997	Down	chr5:92036136:92037988:-	1852	Linc
NONRATT023352.2	0.426815	-1.22832	0.0131401	Down	chr5:101298920:101300575:-	1655	Linc
NONRATT023367.2	175.114	7.45215	7.26e-10	Up	chr5:105003830:105004441:-	611	Sense No Exonic
NONRATT023370.2	0.330435	-1.59756	0.00100827	Down	chr5:105334361:105337781:-	3420	Exonic
NONRATT023405.2	0	#NAME?	0.00258613	Down	chr5:117027101:117038458:-	499	Exonic
NONRATT023442.2	0.461585	-1.11533	0.0452344	Down	chr5:126343875:126344781:-	906	Antisense
NONRATT023479.2	0.392117	-1.35064	0.0212707	Down	chr5:133758684:133759407:-	723	Linc
NONRATT023508.2	3.16138	1.66056	0.0112983	Up	chr5:136022523:136023498:-	595	Exonic
NONRATT023535.2	0.285471	-1.80858	0.0180942	Down	chr5:137369670:137370100:-	430	Linc
NONRATT023536.2	0.428929	-1.22119	0.0152922	Down	chr5:137370579:137371873:-	1294	Antisense
NONRATT023553.2	0.344508	-1.53739	0.00201506	Down	chr5:138518559:138519698:-	1139	Linc
NONRATT023577.2	0.151396	-2.7236	5.23e-05	Down	chr5:140931860:140934067:-	2207	Antisense
NONRATT023600.2	Inf	Inf	0.000621687	Up	chr5:144250420:144251056:-	636	Exonic
NONRATT023683.2	0.348757	-1.51971	0.00265634	Down	chr5:151703141:151704918:-	812	Linc
NONRATT023686.2	7.8989	2.98165	4.06e-08	Up	chr5:151829793:151831374:-	1581	Exonic
NONRATT023687.2	4.06263	2.02241	0.000794995	Up	chr5:151831412:151835348:-	426	Exonic
NONRATT023691.2	0.212581	-2.23392	0.0476197	Down	chr5:151885676:151897517:-	1680	Exonic
NONRATT023711.2	4.3931	2.13524	0.0409983	Up	chr5:153624897:153625573:-	676	Sense No Exonic
NONRATT023755.2	0.0115962	-6.4302	0.00166601	Down	chr5:156811469:156812092:-	623	Linc
NONRATT023819.2	4.01031	2.00371	0.000560122	Up	chr5:161911975:161912695:-	720	Linc
NONRATT023869.2	2.68845	1.42677	0.00462661	Up	chr5:166049195:166050930:-	1735	Sense No Exonic
NONRATT023874.2	0.32058	-1.64124	0.00375287	Down	chr5:166275114:166276928:-	1095	Linc
NONRATT023893.2	0.226108	-2.14492	3.86e-05	Down	chr5:168137916:168141389:-	3473	Exonic
NONRATT023940.2	0.446084	-1.16461	0.0449643	Down	chr5:172689730:172751610:-	1062	Exonic
NONRATT023947.2	2.72621	1.4469	0.0240736	Up	chr5:173216736:173217672:-	936	Exonic
NONRATT024019.2	5.28443	2.40175	0.0200341	Up	chr6:10538837:10539434:+	597	Sense No Exonic
NONRATT024045.2	6.43135	2.68512	0.0499253	Up	chr6:22195184:22195995:+	811	Linc
NONRATT024061.2	5.45645	2.44796	0.0295299	Up	chr6:24181525:24184216:+	2691	Exonic
NONRATT024075.2	7.86047	2.97462	0.00105636	Up	chr6:26560601:26566521:+	289	Exonic
NONRATT024111.2	0	#NAME?	0.0173828	Down	chr6:28175338:28177234:+	414	Exonic
NONRATT024191.2	Inf	Inf	0.0395337	Up	chr6:49874876:49895502:+	561	Exonic
NONRATT024221.2	6.94238	2.79543	1.6e-07	Up	chr6:51663054:51663825:+	771	Linc
NONRATT024222.2	3.10295	1.63364	0.000896692	Up	chr6:51664034:51666145:+	2111	Linc
NONRATT024223.2	Inf	Inf	0.0153029	Up	chr6:52155352:52158464:+	263	Exonic
NONRATT024226.2	0.178399	-2.48682	0.0003877	Down	chr6:52281441:52285192:+	728	Exonic
NONRATT024278.2	3.33357	1.73707	0.0375565	Up	chr6:73658988:73679523:+	809	Exonic
NONRATT024316.2	0.30364	-1.71957	0.00157646	Down	chr6:83082525:83255583:+	1678	Exonic
NONRATT024376.2	3.28944	1.71784	0.0342177	Up	chr6:94481842:94484504:+	1791	Exonic
NONRATT024434.2	0.344685	-1.53665	0.0156364	Down	chr6:102262875:102264347:+	1472	Exonic
NONRATT024462.2	Inf	Inf	0.00464338	Up	chr6:105397843:105398544:+	603	Exonic
NONRATT024474.2	0.396688	-1.33392	0.0208352	Down	chr6:106600451:106601824:+	1373	Linc
NONRATT024498.2	195.38	7.61014	0.0012159	Up	chr6:108087671:108090182:-	2511	Antisense
NONRATT024523.2	0	#NAME?	8.13e-05	Down	chr6:110457654:110458409:+	755	Linc
NONRATT024537.2	10.4568	3.38638	0.0389165	Up	chr6:112609207:112684536:+	388	Exonic
NONRATT024540.2	0.378208	-1.40275	0.0258206	Down	chr6:114057196:114066199:+	727	Sense No Exonic
NONRATT024541.2	0.0237677	-5.39485	1.71e-16	Down	chr6:114068476:114069588:+	1112	Linc
NONRATT024543.2	4.9584	2.30987	0.00230625	Up	chr6:117521843:117522602:+	759	Linc
NONRATT024623.2	0.372837	-1.42338	0.00844614	Down	chr6:133662568:133668363:+	417	Linc
NONRATT024629.2	Inf	Inf	0.0348909	Up	chr6:133667575:133691132:+	1216	Linc
NONRATT024684.2	0.162172	-2.6244	0.0031707	Down	chr6:135228755:135234474:-	743	Exonic
NONRATT024732.2	0.0468054	-4.41718	0.00175417	Down	chr6:145002836:145003163:+	327	Sense No Exonic
NONRATT024738.2	0.249704	-2.00171	0.0169345	Down	chr6:145622809:145625236:+	2427	Exonic
NONRATT024776.2	0.379637	-1.39731	0.0104299	Down	chr6:4243563:4245811:-	2248	Sense No Exonic
NONRATT024781.2	0.478073	-1.0647	0.0440365	Down	chr6:6696169:6709782:-	821	Exonic
NONRATT024810.2	0.474354	-1.07596	0.0222353	Down	chr6:11067658:11068300:-	642	Exonic
NONRATT024817.2	0.410641	-1.28405	0.00873986	Down	chr6:13883623:13885239:-	1616	Linc
NONRATT024831.2	0.416493	-1.26363	0.0229644	Down	chr6:23215218:23230927:-	753	Exonic
NONRATT024837.2	Inf	Inf	0.0160314	Up	chr6:23457767:23458218:-	451	Exonic
NONRATT024852.2	0.0390225	-4.67955	0.000104522	Down	chr6:26214077:26217150:-	456	Exonic
NONRATT024903.2	6.69486	2.74305	0.00733902	Up	chr6:32014186:32014764:-	578	Linc
NONRATT024941.2	0.0129465	-6.2713	0.00141668	Down	chr6:45509894:45513227:-	3333	Linc
NONRATT025059.2	0.372997	-1.42276	0.0114273	Down	chr6:91117849:91118499:-	650	Linc
NONRATT025060.2	4.98257	2.31689	0.0140037	Up	chr6:91455910:91456678:-	768	Exonic
NONRATT025081.2	279.652	8.12749	0.000385252	Up	chr6:92136234:92136940:-	706	Linc
NONRATT025082.2	Inf	Inf	0.0138454	Up	chr6:92158599:92160142:-	376	Exonic
NONRATT025084.2	17.5098	4.13009	0.00697131	Up	chr6:92396536:92398761:-	406	Exonic
NONRATT025138.2	0.375005	-1.41502	0.01476	Down	chr6:101281838:101282459:-	621	Linc
NONRATT025169.2	5.47985	2.45414	0.0273293	Up	chr6:105266256:105266852:-	596	Linc
NONRATT025173.2	0.430553	-1.21574	0.0282263	Down	chr6:105453168:105454418:-	1250	Linc
NONRATT025213.2	0.255195	-1.97033	0.0481693	Down	chr6:108085178:108087594:+	681	Exonic
NONRATT025268.2	0.241911	-2.04745	0.000955096	Down	chr6:123183719:123186346:-	2627	Linc
NONRATT025303.2	0.0263349	-5.24688	0.0130051	Down	chr6:127317625:127319292:-	384	Exonic
NONRATT025315.2	0.405934	-1.30068	0.0143487	Down	chr6:128466610:128467381:-	771	Linc
NONRATT025316.2	0.462575	-1.11224	0.0372901	Down	chr6:128468511:128470164:-	1653	Linc
NONRATT025317.2	0.0941444	-3.40898	0.00585146	Down	chr6:128485966:128489603:-	654	Exonic
NONRATT025332.2	0.438422	-1.18961	0.0125024	Down	chr6:132113800:132116272:-	2472	Linc
NONRATT025365.2	3.0028	1.58631	0.00114987	Up	chr6:135574938:135576620:+	1682	Linc
NONRATT025421.2	18.3194	4.1953	0.0239528	Up	chr6:143194512:143590452:-	363	Linc
NONRATT025424.2	0.314132	-1.67056	0.0171111	Down	chr6:144381739:144384615:-	1388	Linc
NONRATT025548.2	0.1644	-2.60471	0.00362911	Down	chr7:11849730:11856916:+	470	Exonic
NONRATT025572.2	0	#NAME?	0.00386841	Down	chr7:12254864:12255722:+	677	Exonic
NONRATT025658.2	0.367988	-1.44227	0.00649802	Down	chr7:23812513:23814811:+	2298	Linc
NONRATT025672.2	0	#NAME?	0.00654304	Down	chr7:25907624:25908501:+	877	Antisense
NONRATT025755.2	5.94399	2.57143	0.0115373	Up	chr7:37812515:37812772:+	257	Linc
NONRATT025779.2	0.340892	-1.55262	0.0144149	Down	chr7:47586900:47588200:+	1300	Linc
NONRATT025875.2	3.30878	1.7263	0.0132712	Up	chr7:70580274:70582825:+	2551	Exonic
NONRATT025877.2	Inf	Inf	0.0184191	Up	chr7:70614627:70617060:+	693	Exonic
NONRATT025929.2	0	#NAME?	0.0165274	Down	chr7:80351773:80555153:+	641	Exonic
NONRATT025943.2	4.68394	2.22772	0.000106626	Up	chr7:83348747:83356086:+	511	Exonic
NONRATT025981.2	11.003	3.45983	7.67e-12	Up	chr7:99961633:99962613:+	980	Linc
NONRATT025985.2	54.5584	5.76973	1.09e-05	Up	chr7:102648928:102724348:+	578	Linc
NONRATT025987.2	49.6014	5.63231	0.0169717	Up	chr7:102650122:102744760:+	764	Linc
NONRATT025990.2	3.75764	1.90983	0.0220277	Up	chr7:102827117:102869859:+	921	Linc
NONRATT026004.2	12.4703	3.64042	0.0219434	Up	chr7:107710436:107711566:+	662	Exonic
NONRATT026027.2	0.33577	-1.57446	0.00800331	Down	chr7:116358305:116359862:+	1059	Exonic
NONRATT026058.2	14.2248	3.83034	0.000123164	Up	chr7:117435978:117436571:+	593	Exonic
NONRATT026122.2	0.382338	-1.38708	0.0041193	Down	chr7:121335542:121337091:+	1549	Linc
NONRATT026123.2	0.421354	-1.2469	0.0165481	Down	chr7:121337110:121337713:+	603	Linc
NONRATT026129.2	7.12502	2.83289	0.0129492	Up	chr7:121841611:121847496:+	442	Exonic
NONRATT026188.2	3.67437	1.8775	0.00188117	Up	chr7:126047987:126048237:+	250	Linc
NONRATT026211.2	0.299843	-1.73772	0.00173219	Down	chr7:128685117:128728171:+	1668	Exonic
NONRATT026212.2	0	#NAME?	1.84e-19	Down	chr7:128728193:128728832:+	639	Linc
NONRATT026240.2	2.14452	1.10065	0.0263839	Up	chr7:133198297:133199215:+	918	Linc
NONRATT026269.2	0.198345	-2.33392	0.0384981	Down	chr7:139715477:139716303:+	731	Exonic
NONRATT026283.2	0.37828	-1.40247	0.0244499	Down	chr7:139255263:139259130:+	1233	Linc
NONRATT026313.2	0.301918	-1.72777	0.000735206	Down	chr7:142687112:142688624:+	1512	Linc
NONRATT026344.2	Inf	Inf	0.000456377	Up	chr7:144080912:144081403:+	400	Exonic
NONRATT026347.2	3.4586	1.79019	0.0068849	Up	chr7:144093238:144102024:+	1391	Exonic
NONRATT026350.2	0.260676	-1.93967	0.000728761	Down	chr7:144607445:144608541:+	1096	Exonic
NONRATT026392.2	2.66146	1.41222	0.0222583	Up	chr7:2978758:2979214:-	456	Linc
NONRATT026446.2	0.23774	-2.07254	0.0261955	Down	chr7:11335021:11336690:-	1669	Linc
NONRATT026464.2	3.53231	1.82061	0.00314628	Up	chr7:11458985:11462473:-	913	Exonic
NONRATT026473.2	3.11939	1.64126	0.00371715	Up	chr7:11712188:11714073:-	1885	Exonic
NONRATT026501.2	3.42254	1.77507	0.0383509	Up	chr7:12282651:12283318:-	667	Exonic
NONRATT026540.2	Inf	Inf	0.000503482	Up	chr7:12736618:12737379:-	467	Exonic
NONRATT026542.2	Inf	Inf	0.000782391	Up	chr7:12743300:12744323:-	770	Exonic
NONRATT026544.2	5.09071	2.34787	0.0148189	Up	chr7:12763476:12764429:-	953	Sense No Exonic
NONRATT026560.2	0.00499226	-7.64609	0.0021739	Down	chr7:14222096:14228950:-	3792	Exonic
NONRATT026562.2	2.62909	1.39456	0.0116723	Up	chr7:14232749:14234683:-	1934	Sense No Exonic
NONRATT026564.2	3.19142	1.6742	0.0282163	Up	chr7:14251534:14252430:-	896	Sense No Exonic
NONRATT026618.2	0.294873	-1.76183	0.034019	Down	chr7:24693336:24721122:-	537	Linc
NONRATT026629.2	Inf	Inf	0.00593091	Up	chr7:26970649:26984384:-	289	Exonic
NONRATT026678.2	0.472246	-1.08239	0.0399795	Down	chr7:32980270:32981818:-	415	Linc
NONRATT026684.2	5.19507	2.37714	0.0253873	Up	chr7:33968430:33985821:-	504	Linc
NONRATT026694.2	Inf	Inf	0.00176652	Up	chr7:35610957:35611373:-	416	Linc
NONRATT026726.2	0.166763	-2.58413	0.0326741	Down	chr7:50638627:50639001:-	374	Exonic
NONRATT026739.2	0.35312	-1.50177	0.0130176	Down	chr7:52965913:52967101:-	491	Linc
NONRATT026743.2	47.0798	5.55704	0.0311861	Up	chr7:54767827:54778800:-	792	Exonic
NONRATT026744.2	Inf	Inf	0.000694355	Up	chr7:54767933:54778815:-	787	Exonic
NONRATT026769.2	9.84071	3.29876	0.00937428	Up	chr7:60335967:60338324:-	2357	Exonic
NONRATT026776.2	15.3431	3.93952	0.0457931	Up	chr7:60726989:60743623:-	1177	Exonic
NONRATT026805.2	26.3316	4.71872	1.44e-05	Up	chr7:65156978:65159832:-	2854	Linc
NONRATT026808.2	0.325259	-1.62034	0.00327905	Down	chr7:66017082:66056905:-	2259	Linc
NONRATT026811.2	0.385226	-1.37622	0.0114184	Down	chr7:66842497:66843449:-	952	Linc
NONRATT026833.2	29.9491	4.90444	0.0472038	Up	chr7:70571434:70573256:-	1368	Exonic
NONRATT026881.2	0.443732	-1.17224	0.0187294	Down	chr7:76746469:76748613:-	2144	Linc
NONRATT026882.2	0.471244	-1.08545	0.0379813	Down	chr7:76748876:76749867:-	991	Linc
NONRATT026911.2	0.381934	-1.38861	0.0186544	Down	chr7:90085452:90087495:-	2043	Linc
NONRATT026936.2	Inf	Inf	0.00507686	Up	chr7:95395410:95396818:-	1408	Linc
NONRATT026957.2	0.331625	-1.59237	0.00669749	Down	chr7:98059908:98061125:-	1217	Linc
NONRATT026958.2	0.331382	-1.59343	0.00983297	Down	chr7:98061619:98062280:-	661	Linc
NONRATT026971.2	0.332048	-1.59054	0.014333	Down	chr7:98798472:98802196:-	244	Antisense
NONRATT026981.2	6.4374	2.68648	0.0239024	Up	chr7:107263454:107264105:-	651	Linc
NONRATT026983.2	Inf	Inf	0.0284729	Up	chr7:107895041:107897789:-	2748	Linc
NONRATT026999.2	2.98698	1.57869	0.00338276	Up	chr7:114328700:114330582:-	1882	Linc
NONRATT027045.2	0.00910012	-6.7799	0.000304534	Down	chr7:117180655:117187427:-	959	Linc
NONRATT027085.2	8.96983	3.16508	0.00486064	Up	chr7:119064671:119065274:-	603	Sense No Exonic
NONRATT027089.2	0.337604	-1.5666	0.00412954	Down	chr7:119218712:119227165:-	1214	Linc
NONRATT027128.2	8.17366	3.03098	0.00195495	Up	chr7:121202760:121203501:-	741	Linc
NONRATT027142.2	4.41215	2.14148	0.010948	Up	chr7:122915846:122923501:-	578	Antisense
NONRATT027181.2	Inf	Inf	0.0406052	Up	chr7:124230017:124234724:-	782	Exonic
NONRATT027195.2	8.08266	3.01483	0.00250495	Up	chr7:125744096:125745468:-	1372	Sense No Exonic
NONRATT027287.2	0	#NAME?	0.0458193	Down	chr7:137970551:137973421:-	2870	Linc
NONRATT027305.2	0.193834	-2.3671	0.00732328	Down	chr7:139195984:139196388:-	404	Linc
NONRATT027373.2	0.441078	-1.18089	0.0132094	Down	chr7:144811811:144814624:-	2813	Linc
NONRATT027374.2	0.441524	-1.17944	0.0168871	Down	chr7:144814849:144815870:-	1021	Linc
NONRATT027392.2	Inf	Inf	0.0215429	Up	chr8:2616357:2636172:+	334	Exonic
NONRATT027425.2	0	#NAME?	0.00539725	Down	chr8:12872778:12875701:+	713	Linc
NONRATT027442.2	139.279	7.12183	0.0374416	Up	chr8:13866769:13871329:+	352	Exonic
NONRATT027460.2	0.020691	-5.59485	0.000676055	Down	chr8:16928122:16928719:+	597	Linc
NONRATT027509.2	26.0035	4.70063	0.0236538	Up	chr8:22795158:22795829:+	671	Antisense
NONRATT027551.2	0.408386	-1.292	0.0105877	Down	chr8:33389736:33392240:+	2504	Linc
NONRATT027576.2	0.496589	-1.00988	0.0496524	Down	chr8:39687384:39703080:+	1244	Exonic
NONRATT027580.2	3.02599	1.59741	0.00526921	Up	chr8:39891006:39892820:+	1814	Exonic
NONRATT027592.2	3.45157	1.78725	0.000708501	Up	chr8:45798355:45800455:+	2100	Linc
NONRATT027594.2	3.68613	1.88211	0.0023966	Up	chr8:45803755:45804977:+	1222	Linc
NONRATT027596.2	2.42081	1.27549	0.0143976	Up	chr8:45805937:45809133:+	3196	Linc
NONRATT027644.2	24.4204	4.61002	0.0363721	Up	chr8:49702705:49703419:+	714	Exonic
NONRATT027694.2	0.417645	-1.25965	0.0216586	Down	chr8:56610553:56629323:+	732	Exonic
NONRATT027695.2	0.236344	-2.08104	0.0116519	Down	chr8:56610582:56627069:+	620	Exonic
NONRATT027752.2	0.1273	-2.9737	4.14e-05	Down	chr8:63287110:63287608:+	498	Exonic
NONRATT027769.2	18.759	4.22951	0.00125117	Up	chr8:65733159:65733509:+	350	Sense No Exonic
NONRATT027773.2	4.91148	2.29616	0.0159296	Up	chr8:66298700:66301183:+	271	Exonic
NONRATT027782.2	4.76253	2.25173	0.000763621	Up	chr8:69124748:69125666:+	918	Exonic
NONRATT027789.2	6.51912	2.70468	0.00163786	Up	chr8:70246989:70250318:+	765	Linc
NONRATT027801.2	6.31117	2.65791	0.0117307	Up	chr8:70572342:70573165:+	823	Exonic
NONRATT027814.2	365.443	8.5135	0.0353615	Up	chr8:71937230:71941941:+	784	Exonic
NONRATT027859.2	0.417653	-1.25962	0.0281286	Down	chr8:73834098:73835009:+	911	Linc
NONRATT027865.2	30.7158	4.94091	2.3e-05	Up	chr8:75723252:75723590:+	279	Exonic
NONRATT027881.2	0.438536	-1.18923	0.0139851	Down	chr8:82159051:82160538:+	1487	Linc
NONRATT027882.2	0.437578	-1.19239	0.014358	Down	chr8:82160573:82161998:+	1425	Linc
NONRATT027945.2	Inf	Inf	0.00411442	Up	chr8:99625585:99641486:+	1399	Exonic
NONRATT028049.2	0.402456	-1.3131	0.0448878	Down	chr8:117589568:117590867:+	521	Exonic
NONRATT028104.2	0.367013	-1.4461	0.0404166	Down	chr8:119691394:119721907:+	637	Exonic
NONRATT028107.2	9.8835	3.30502	6.8e-05	Up	chr8:121972730:121973470:+	740	Antisense
NONRATT028149.2	9.23972	3.20785	0.00015477	Up	chr8:128027551:128028307:+	326	Exonic
NONRATT028168.2	2.13203	1.09223	0.0493338	Up	chr8:128807127:128808756:+	751	Exonic
NONRATT028180.2	3.06052	1.61377	0.0498211	Up	chr8:129241110:129242425:+	750	Exonic
NONRATT028185.2	5.36769	2.4243	0.0200049	Up	chr8:129620523:129621129:+	606	Exonic
NONRATT028186.2	3.64997	1.86788	0.0471517	Up	chr8:129624394:129624835:+	441	Sense No Exonic
NONRATT028197.2	7.13021	2.83394	0.0483451	Up	chr8:130393772:130395694:+	1829	Linc
NONRATT028236.2	0.448625	-1.15642	0.0213657	Down	chr8:1435678:1437447:-	1769	Linc
NONRATT028263.2	4.35374	2.12226	0.000609577	Up	chr8:13090059:13109704:-	416	Linc
NONRATT028282.2	0.374553	-1.41676	0.019164	Down	chr8:14412733:14414605:-	1872	Linc
NONRATT028437.2	0.407421	-1.29541	0.0458625	Down	chr8:43316467:43317495:-	516	Linc
NONRATT028444.2	0	#NAME?	0.00304495	Down	chr8:46228073:46229908:-	1835	Exonic
NONRATT028495.2	0.175443	-2.51093	0.000683485	Down	chr8:49408585:49436962:-	570	Antisense
NONRATT028502.2	0.493383	-1.01922	0.038936	Down	chr8:50158594:50161935:-	3341	Antisense
NONRATT028530.2	0.399223	-1.32473	0.0325174	Down	chr8:53836792:53837544:-	752	Linc
NONRATT028558.2	Inf	Inf	0.00433168	Up	chr8:55378529:55379088:-	559	Linc
NONRATT028564.2	0	#NAME?	0.00036655	Down	chr8:57248616:57250884:-	2268	Exonic
NONRATT028614.2	3.22808	1.69068	0.0214606	Up	chr8:61835202:61836791:-	241	Exonic
NONRATT028624.2	0.389115	-1.36173	0.024806	Down	chr8:62221187:62222368:-	1181	Linc
NONRATT028712.2	0.145682	-2.77911	0.010855	Down	chr8:72472329:72473692:-	1363	Linc
NONRATT028785.2	0.446926	-1.16189	0.0185978	Down	chr8:82498126:82499422:-	1296	Linc
NONRATT028786.2	0.441336	-1.18005	0.0154115	Down	chr8:82504255:82505661:-	1406	Linc
NONRATT028803.2	5.6079	2.48746	4.46e-06	Up	chr8:85840962:85841768:-	806	Sense No Exonic
NONRATT028807.2	10.5629	3.40093	0.00811544	Up	chr8:87154488:87155389:-	380	Linc
NONRATT028808.2	6.3238	2.66079	0.00730467	Up	chr8:87154562:87158029:-	371	Linc
NONRATT028827.2	0.301887	-1.72792	0.00139564	Down	chr8:91321725:91338861:-	375	Exonic
NONRATT028873.2	8.91578	3.15636	8.44e-06	Up	chr8:102171106:102171731:-	625	Linc
NONRATT028890.2	17.7004	4.14571	6.82e-05	Up	chr8:104587232:104589557:-	2325	Linc
NONRATT028892.2	Inf	Inf	0.011848	Up	chr8:104632152:104656179:-	742	Linc
NONRATT028940.2	Inf	Inf	4.99e-16	Up	chr8:115134794:115136594:-	437	Exonic
NONRATT028947.2	0.0578726	-4.11097	1.68e-08	Down	chr8:115167299:115167696:-	397	Linc
NONRATT028952.2	2.34559	1.22995	0.0238958	Up	chr8:115392589:115396246:-	3657	Exonic
NONRATT028965.2	6.40579	2.67938	0.0494393	Up	chr8:116319497:116320633:-	501	Antisense
NONRATT028969.2	Inf	Inf	0.000745851	Up	chr8:116371174:116373043:-	551	Exonic
NONRATT028999.2	4.99662	2.32095	0.0050556	Up	chr8:117438769:117446026:-	663	Exonic
NONRATT029085.2	0.414524	-1.27047	0.0215661	Down	chr8:128738684:128739865:-	1181	Linc
NONRATT029123.2	0.261187	-1.93684	0.0116597	Down	chr9:1746436:1747732:+	1296	Linc
NONRATT029135.2	0.111154	-3.16937	0.00753445	Down	chr9:11731868:11733445:+	802	Linc
NONRATT029136.2	0.463297	-1.10999	0.028749	Down	chr9:12315913:12317121:+	1208	Linc
NONRATT029140.2	0.311702	-1.68176	0.0162328	Down	chr9:13475192:13476376:+	1184	Linc
NONRATT029161.2	0.155668	-2.68346	0.0434338	Down	chr9:15306950:15309559:+	657	Linc
NONRATT029182.2	2.22274	1.15234	0.0402055	Up	chr9:16512745:16513810:+	929	Linc
NONRATT029202.2	0.373114	-1.42231	0.0226456	Down	chr9:16901583:16902159:+	576	Linc
NONRATT029216.2	9.55088	3.25563	0.000110056	Up	chr9:17347880:17354193:+	793	Exonic
NONRATT029218.2	6.0385	2.59419	0.000138196	Up	chr9:17352948:17355681:+	2733	Exonic
NONRATT029265.2	Inf	Inf	0.0354338	Up	chr9:24078589:24088059:+	470	Exonic
NONRATT029273.2	0.0811915	-3.62253	0.0491854	Down	chr9:27014828:27015303:+	475	Linc
NONRATT029275.2	0.0442863	-4.49699	0.0261008	Down	chr9:27334067:27345190:+	469	Exonic
NONRATT029295.2	3.09446	1.62969	0.00908209	Up	chr9:38195950:38199299:+	1001	Linc
NONRATT029373.2	0.40563	-1.30176	0.0260011	Down	chr9:53443000:53443652:+	652	Linc
NONRATT029375.2	0.1115	-3.16488	0.0482318	Down	chr9:53706228:53708792:+	369	Exonic
NONRATT029392.2	4.10669	2.03798	0.038929	Up	chr9:61739631:61742965:+	685	Exonic
NONRATT029417.2	3.12669	1.64464	0.00477987	Up	chr9:65585326:65587251:+	1925	Linc
NONRATT029424.2	Inf	Inf	8.25e-05	Up	chr9:66499407:66501761:+	339	Exonic
NONRATT029429.2	0.4646	-1.10594	0.0183324	Down	chr9:66678199:66683020:+	4821	Linc
NONRATT029471.2	0.423155	-1.24074	0.00932645	Down	chr9:74014581:74017583:-	3002	Linc
NONRATT029487.2	7.54039	2.91464	0.00301705	Up	chr9:80002930:80003613:+	340	Exonic
NONRATT029488.2	2.83757	1.50465	0.0147377	Up	chr9:80002996:80004332:+	942	Exonic
NONRATT029553.2	2.33755	1.225	0.0208267	Up	chr9:82765248:82765997:+	749	Linc
NONRATT029559.2	Inf	Inf	7.17e-06	Up	chr9:84690776:84692192:+	1416	Linc
NONRATT029670.2	Inf	Inf	0.0354015	Up	chr9:98509683:98511380:+	780	Linc
NONRATT029777.2	6.57187	2.7163	0.0435241	Up	chr9:13814718:13815040:-	322	Linc
NONRATT029785.2	21.1	4.39917	0.00201184	Up	chr9:14725705:14726301:-	596	Linc
NONRATT029850.2	0.291568	-1.77809	0.0308021	Down	chr9:23348412:23352113:-	571	Linc
NONRATT029856.2	6.36309	2.66973	0.0001487	Up	chr9:27112632:27114344:-	1712	Linc
NONRATT029874.2	6.05764	2.59876	0.0172667	Up	chr9:29643082:29647909:-	534	Exonic
NONRATT029875.2	26.8054	4.74445	2.06e-05	Up	chr9:29646780:29647914:-	865	Exonic
NONRATT029889.2	2.37804	1.24978	0.0291133	Up	chr9:37227907:37231141:-	581	Exonic
NONRATT029932.2	2.78397	1.47714	0.00546169	Up	chr9:43550678:43551604:-	926	Linc
NONRATT029958.2	0.282249	-1.82496	0.0269699	Down	chr9:45468221:45469911:-	1690	Linc
NONRATT029962.2	12.6843	3.66497	6.23e-07	Up	chr9:46282126:46283888:-	507	Linc
NONRATT029963.2	3.52511	1.81767	0.0283107	Up	chr9:46282797:46283906:-	1109	Linc
NONRATT029964.2	15.4966	3.95388	0.0110945	Up	chr9:46286318:46298114:-	729	Linc
NONRATT029966.2	0.369565	-1.4361	0.00843476	Down	chr9:46359544:46360219:-	675	Linc
NONRATT029994.2	Inf	Inf	0.00340884	Up	chr9:54288834:54292434:-	377	Exonic
NONRATT030006.2	0.0435428	-4.52142	0.0217638	Down	chr9:59289616:59289945:-	329	Linc
NONRATT030017.2	0.461149	-1.11669	0.0396333	Down	chr9:61059069:61060765:-	1696	Linc
NONRATT030056.2	Inf	Inf	0.00839235	Up	chr9:65545205:65547806:-	703	Antisense
NONRATT030081.2	9.37254	3.22844	0.0320047	Up	chr9:67282121:67284504:-	2383	Antisense
NONRATT030097.2	6.68473	2.74087	0.0335782	Up	chr9:71915417:71917425:+	526	Linc
NONRATT030117.2	0.321749	-1.63599	0.00206306	Down	chr9:73683920:73686578:+	2658	Linc
NONRATT030119.2	0.0104505	-6.58029	0.000260212	Down	chr9:73614969:73615827:+	280	Linc
NONRATT030122.2	0.321522	-1.63701	0.0480783	Down	chr9:73404870:73418612:+	410	Exonic
NONRATT030124.2	0.455319	-1.13505	0.0385138	Down	chr9:75014044:75015057:-	1013	Linc
NONRATT030159.2	2.22096	1.15119	0.0270582	Up	chr9:81582473:81583238:-	765	Antisense
NONRATT030197.2	4.66203	2.22096	7.95e-05	Up	chr9:83101095:83102753:-	1658	Linc
NONRATT030281.2	0	#NAME?	4.33e-13	Down	chr9:98514603:98515204:-	367	Exonic
NONRATT030308.2	12.7134	3.66827	0.0148854	Up	chr9:100556391:100557506:-	978	Exonic
NONRATT030317.2	13.1557	3.71762	0.0278655	Up	chr9:100921568:100922269:-	701	Exonic
NONRATT030387.2	5.91534	2.56446	0.0454145	Up	chr9:119332344:119332953:-	609	Exonic
NONRATT030412.2	Inf	Inf	0.0189308	Up	chrX:3684205:3685515:+	751	Linc
NONRATT030413.2	11.1593	3.48018	0.00157626	Up	chrX:3684578:3685524:+	946	Linc
NONRATT030423.2	6.99154	2.80561	4.37e-06	Up	chrX:11077544:11082563:+	2434	Exonic
NONRATT030429.2	0.40647	-1.29878	0.0267587	Down	chrX:14494739:14496543:+	1804	Linc
NONRATT030550.2	0.41349	-1.27408	0.0293677	Down	chrX:22436114:22437496:-	1382	Linc
NONRATT030562.2	0.390089	-1.35812	0.0159383	Down	chrX:67830518:67832033:+	1515	Linc
NONRATT030563.2	0.380154	-1.39534	0.0135856	Down	chrX:67833687:67835273:+	1586	Linc
NONRATT030592.2	0.179397	-2.47877	3.82e-06	Down	chrX:71540963:71544044:+	369	Exonic
NONRATT030602.2	0.0300975	-5.05421	0.00507092	Down	chrX:73427865:73535944:+	240	Sense No Exonic
NONRATT030653.2	Inf	Inf	8.17e-05	Up	chrX:105272808:105273453:+	385	Exonic
NONRATT030654.2	Inf	Inf	5.49e-06	Up	chrX:105286238:105289053:+	2815	Linc
NONRATT030659.2	0.354494	-1.49617	0.0496714	Down	chrX:106747207:106749739:-	418	Exonic
NONRATT030691.2	0	#NAME?	0.0294841	Down	chrX:115039393:115041191:+	1798	Linc
NONRATT030751.2	0.0175823	-5.82973	0.000172997	Down	chrX:122808707:122810156:+	439	Exonic
NONRATT030781.2	0.0859181	-3.54089	0.0101231	Down	chrX:124895113:124904840:+	741	Exonic
NONRATT030820.2	0.0987538	-3.34002	0.00332406	Down	chrX:145867583:145867971:+	388	Linc
NONRATT030840.2	0	#NAME?	0.0496663	Down	chrX:1734009:1734754:-	253	Exonic
NONRATT030855.2	Inf	Inf	0.0305602	Up	chrX:4837210:4843450:-	818	Linc
NONRATT030878.2	0.438637	-1.1889	0.0201634	Down	chrX:14888400:14889626:-	1226	Linc
NONRATT030909.2	0.421149	-1.2476	0.0155805	Down	chrX:18440757:18457451:-	714	Linc
NONRATT030971.2	0.383613	-1.38228	0.006675	Down	chrX:38421225:38449972:-	943	Exonic
NONRATT031022.2	0.275534	-1.8597	0.000675324	Down	chrX:22261980:22262645:+	665	Sense No Exonic
NONRATT031032.2	36.0186	5.17067	0.0398864	Up	chrX:64809913:64810491:-	578	Linc
NONRATT031102.2	Inf	Inf	0.0350701	Up	chrX:79667526:79667772:-	246	Linc
NONRATT031122.2	31.0451	4.95629	5.06e-05	Up	chrX:88312690:88314544:-	1854	Linc
NONRATT031168.2	0.433785	-1.20495	0.034585	Down	chrX:107531400:107533060:-	1648	Exonic
NONRATT031177.2	0.344945	-1.53556	0.0384149	Down	chrX:113583122:113583744:-	622	Linc
NONRATT031233.2	0	#NAME?	3.68e-07	Down	chrX:116751229:116751951:-	722	Linc
NONRATT031292.2	19.0679	4.25307	0.0181666	Up	chrX:131985171:132497436:-	434	Linc
NONRATT031299.2	4.5382	2.18212	0.0224459	Up	chrX:135237158:135238261:-	1103	Linc
NONRATT031301.2	0.287152	-1.80011	0.0399211	Down	chrX:135325736:135332479:-	484	Exonic
NONRATT031312.2	0.282373	-1.82433	0.027425	Down	chrX:142131906:142132270:-	364	Sense No Exonic
NONRATT031360.1	5.25031	2.3924	0.00886657	Up	chr1:42133307:42134374:+	1067	Linc
NONRATT031401.1	0.335964	-1.57362	0.00639863	Down	chr1:113419724:113527735:+	906	Linc
NONRATT031560.1	0.343688	-1.54083	0.0180488	Down	chr1:165181860:165237452:-	2598	Antisense
NONRATT031567.1	0.336016	-1.5734	0.0466012	Down	chr1:198162428:198168448:-	2526	Linc
NONRATT031689.1	5.3611	2.42253	0.0342322	Up	chr10:35044233:35054225:-	4540	Linc
NONRATT031740.1	22.6516	4.50154	0.00052042	Up	chr11:24175416:24177645:+	1188	Linc
NONRATT031815.1	4.57361	2.19333	0.000150581	Up	chr12:22601607:22605139:+	671	Linc
NONRATT031892.1	0.408393	-1.29197	0.0232524	Down	chr13:77264238:77485250:+	643	Linc
NONRATT031980.1	24.7601	4.62995	0.00530944	Up	chr14:86100049:86101181:+	834	Linc
NONRATT032021.1	0.350585	-1.51216	0.0103714	Down	chr14:60060071:60069864:-	232	Exonic
NONRATT032076.1	Inf	Inf	0.00347537	Up	chr15:32020006:32024705:+	4478	Linc
NONRATT032172.1	0.378316	-1.40234	0.00703817	Down	chr16:4439101:4446046:+	3784	Linc
NONRATT032307.1	Inf	Inf	0.0435509	Up	chr17:37687354:37911332:+	571	Linc
NONRATT032363.1	0	#NAME?	0.0372553	Down	chr17:86593349:86595151:-	462	Linc
NONRATT032674.1	0.0871453	-3.52043	0.0111597	Down	chr2:28834123:28839602:-	820	Linc
NONRATT032743.1	0.0843831	-3.5669	0.0252306	Down	chr2:177433732:177535189:-	1420	Linc
NONRATT032812.1	0.413668	-1.27346	0.0203675	Down	chr20:56198048:56199332:+	795	Linc
NONRATT032843.1	0.335195	-1.57693	0.0144902	Down	chr20:27362612:27380815:-	666	Linc
NONRATT033013.1	6.36755	2.67074	0.0451827	Up	chr3:154850172:154851168:-	668	Linc
NONRATT033106.1	0.440241	-1.18364	0.0180434	Down	chr4:16946937:16953847:-	4824	Sense No Exonic
NONRATT033133.1	0.313608	-1.67297	0.0205177	Down	chr4:116826985:116839308:-	5300	Linc
NONRATT033435.1	0.291318	-1.77933	0.00131884	Down	chr7:1586916:1591850:+	865	Linc
NONRATT033549.1	0.22619	-2.1444	0.0119735	Down	chr7:88032950:88071529:-	539	Linc
NONRATT033783.1	Inf	Inf	0.0127171	Up	chr9:27210508:27213172:-	343	Linc
NONRATT033833.1	12.0855	3.59521	0.00423078	Up	chrX:65367911:65368639:+	728	Linc
NONRATT033880.1	0.400325	-1.32076	0.0221888	Down	chrX:62827047:62828058:-	1011	Linc
NONRATT033887.1	8.24434	3.0434	0.000267349	Up	chrX:73774325:73775072:-	747	Sense No Exonic
NONRATT033918.1	14.9323	3.90037	0.0411996	Up	chr1:221508158:221512116:+	683	Antisense
NONRATT033921.1	3.55661	1.8305	0.00849476	Up	chr1:224921299:224924589:+	874	Linc
NONRATT033929.1	3.13586	1.64886	0.047869	Up	chr1:215744403:215747080:-	2325	Linc
NONRATT033949.1	12.7456	3.67193	0.00127287	Up	chr10:105498626:105499916:-	1290	Antisense
NONRATT033963.1	6.11001	2.61118	0.0172437	Up	chr12:30495541:30496547:-	1006	Sense No Exonic
NONRATT034008.1	8.02188	3.00394	0.00458366	Up	chr19:39502152:39537050:+	1350	Linc
NONRATT034042.1	20.5528	4.36126	0.00668584	Up	chr20:6845446:6845947:-	501	Sense No Exonic
NONRATT034050.1	0.497345	-1.00768	0.0307973	Down	chr3:111397050:111410587:+	7706	Linc
NONRATT034087.1	58.8758	5.8796	0.00593259	Up	chr7:102650109:102791009:+	822	Linc
NONRATT034090.1	5.25564	2.39387	0.025098	Up	chr7:102650146:102869518:+	1034	Linc
NONRATT034092.1	10.5713	3.40208	0.0100895	Up	chr7:102723414:102862050:+	403	Linc
NONRATT034094.1	Inf	Inf	0.0105827	Up	chr7:102723465:102862260:+	669	Linc
NONRATT034097.1	6.21	2.63459	0.0358403	Up	chr7:102827180:102869518:+	628	Linc
NONRATT034100.1	7.15401	2.83875	0.016694	Up	chr7:102862963:102869518:+	686	Linc
NONRATT034109.1	0.347211	-1.52611	0.0141607	Down	chr7:35623722:35643204:-	10363	Linc
NONRATT034110.1	0.338493	-1.5628	0.0128151	Down	chr7:35719988:35739470:-	10363	Linc
NONRATT034124.1	0.226647	-2.14148	0.00592937	Down	chr9:49430503:49475324:-	776	Linc
TCONS_00000028	5.3079	2.40814	0.0155003	Up	Chr1:8193672:8198214:+	1452	intronic
TCONS_00000033	3.94701	1.98076	0.021503	Up	Chr1:11947396:12014730:+	342	sense-overlapping
TCONS_00000173	0.474906	-1.07429	0.0373499	Down	Chr1:43489618:43537782:+	6742	sense-overlapping
TCONS_00000429	0.384355	-1.37949	0.0121302	Down	Chr1:78919947:78927614:+	605	intergenic
TCONS_00000609	0.328963	-1.604	0.00284515	Down	Chr1:91070326:91071085:+	622	antisense
TCONS_00000736	11.1292	3.47628	1.19e-08	Up	Chr1:104586073:104604860:+	4594	intronic
TCONS_00000737	10.4726	3.38855	1.45e-08	Up	Chr1:104590995:104598122:+	6610	intronic
TCONS_00000738	12.9303	3.69268	5.87e-10	Up	Chr1:104598193:104604860:+	6561	intronic
TCONS_00000791	0.321064	-1.63907	0.00289265	Down	Chr1:121569593:121577140:+	533	intergenic
TCONS_00000792	0.262596	-1.92908	0.00123253	Down	Chr1:121569595:121575296:+	519	intergenic
TCONS_00000827	2.43597	1.2845	0.0449505	Up	Chr1:128991626:129055266:+	3811	intronic
TCONS_00000885	0.370625	-1.43197	0.0108243	Down	Chr1:146605767:146712015:+	4410	intergenic
TCONS_00000886	0.346626	-1.52855	0.0117119	Down	Chr1:146628415:146712045:+	3993	intergenic
TCONS_00000943	3.26278	1.7061	0.00282323	Up	Chr1:162087017:162158260:+	6078	intronic
TCONS_00001852	0.376678	-1.4086	0.021468	Down	Chr1:266677721:266794381:+	525	sense-overlapping
TCONS_00001924	0.332848	-1.58706	0.0287397	Down	Chr1:511054:513438:-	227	intergenic
TCONS_00002055	3.64155	1.86455	0.0141554	Up	Chr1:23992186:24074721:-	465	sense-overlapping
TCONS_00002202	0.301532	-1.72962	0.0146739	Down	Chr1:56873977:56880921:-	1635	intronic
TCONS_00002694	0.242699	-2.04276	0.0146238	Down	Chr1:116711646:116763205:-	797	sense-overlapping
TCONS_00002695	0.393167	-1.34679	0.00544676	Down	Chr1:116711646:116763808:-	1402	sense-overlapping
TCONS_00003114	0.434303	-1.20323	0.0272471	Down	Chr1:194813203:194977566:-	1900	intergenic
TCONS_00004148	0	#NAME?	0.0243004	Down	Chr10:15135679:15188723:+	435	sense-overlapping
TCONS_00004210	17.3412	4.11613	0.000907654	Up	Chr10:29002988:29044922:+	409	sense-overlapping
TCONS_00004213	0.103617	-3.27067	1.15e-05	Down	Chr10:29013546:29044910:+	368	sense-overlapping
TCONS_00004756	4.58871	2.19809	0.000202656	Up	Chr10:67762988:67843247:+	1480	sense-overlapping
TCONS_00004864	2.37694	1.24911	0.0140982	Up	Chr10:76542789:76627495:+	494	intergenic
TCONS_00005008	26.5528	4.73079	1e-05	Up	Chr10:88630865:88638080:+	236	intronic
TCONS_00005304	0.43892	-1.18797	0.0461742	Down	Chr10:481717:483929:-	892	intronic
TCONS_00005634	0.155642	-2.68369	0.00281739	Down	Chr10:37563701:37568504:-	236	intergenic
TCONS_00005665	0.280329	-1.83481	0.000275563	Down	Chr10:40788669:40848424:-	1849	sense-overlapping
TCONS_00005666	0.404712	-1.30503	0.00831957	Down	Chr10:40788669:40848424:-	1847	sense-overlapping
TCONS_00005669	0.332059	-1.59049	0.000879447	Down	Chr10:40848567:40855832:-	7242	sense-overlapping
TCONS_00006372	0.147061	-2.76551	0.0123819	Down	Chr10:97939751:97941937:-	1018	antisense
TCONS_00007438	0.40316	-1.31057	0.0465832	Down	Chr12:6957263:7000830:+	248	intergenic
TCONS_00007472	0.388072	-1.3656	0.0109902	Down	Chr12:7263070:7551682:+	836	sense-overlapping
TCONS_00007961	0.303618	-1.71967	0.00358131	Down	Chr12:5456317:5457842:-	492	intergenic
TCONS_00008126	0.430076	-1.21734	0.0377121	Down	Chr12:18785460:18932021:-	3479	antisense
TCONS_00008205	2.86117	1.5166	0.0205551	Up	Chr12:25035162:25098919:-	251	antisense
TCONS_00008647	411.338	8.68418	2.2e-20	Up	Chr13:70748288:70749443:+	597	intronic
TCONS_00008880	4.28943	2.10079	0.0402703	Up	Chr13:112139187:112149010:+	362	intergenic
TCONS_00009065	0.133924	-2.90051	1.97e-05	Down	Chr13:61717913:61729934:-	1631	intergenic
TCONS_00009127	65.5105	6.03365	2.88e-11	Up	Chr13:74593274:74675382:-	315	intergenic
TCONS_00009388	0.350174	-1.51386	0.0155951	Down	Chr13:103388701:103397335:-	2666	antisense
TCONS_00009930	0.34607	-1.53086	0.0221466	Down	Chr14:94263292:94598983:+	818	sense-overlapping
TCONS_00009932	0.405722	-1.30144	0.048838	Down	Chr14:94281562:94372659:+	868	sense-overlapping
TCONS_00010236	5.73989	2.52102	0.047451	Up	Chr14:36886075:36894213:-	296	intergenic
TCONS_00010745	Inf	Inf	3.55e-10	Up	Chr15:19841008:19847422:+	1417	intronic
TCONS_00010913	4.79753	2.26229	0.00675599	Up	Chr15:41035987:41066646:+	7481	sense-overlapping
TCONS_00010938	0.354864	-1.49466	0.0364218	Down	Chr15:43393020:43421958:+	2167	sense-overlapping
TCONS_00010958	6.99548	2.80642	0.00512668	Up	Chr15:47211562:47212284:+	604	sense-overlapping
TCONS_00011972	3.31699	1.72987	0.00861012	Up	Chr16:64745585:64749900:+	296	intergenic
TCONS_00012066	0.338975	-1.56075	0.0106256	Down	Chr16:81944844:81948482:+	3217	intronic
TCONS_00012128	4.05028	2.01802	0.0353979	Up	Chr16:6541615:6572486:-	215	antisense
TCONS_00012223	0.45617	-1.13236	0.04691	Down	Chr16:18870692:18912312:-	1020	sense-overlapping
TCONS_00012228	27.3812	4.77511	5.64e-11	Up	Chr16:18956383:18988989:-	284	sense-overlapping
TCONS_00012384	0.151491	-2.7227	0.000880259	Down	Chr16:56827029:56827483:-	430	intronic
TCONS_00012685	0.377614	-1.40501	0.0258469	Down	Chr17:13564834:13615767:+	621	antisense
TCONS_00012698	0.46554	-1.10302	0.0239133	Down	Chr17:13742131:13798366:+	5491	sense-overlapping
TCONS_00013421	2.40149	1.26393	0.0137682	Up	Chr17:45530413:45596108:-	258	intergenic
TCONS_00014219	0.301911	-1.72781	0.0353427	Down	Chr18:28626386:28627136:-	617	antisense
TCONS_00015450	0.196712	-2.34584	0.00197564	Down	Chr2:58120118:58137626:+	896	intergenic
TCONS_00015675	7.3377	2.87533	0.0412573	Up	Chr2:140414848:140416059:+	225	intergenic
TCONS_00016261	0.258447	-1.95206	0.00582342	Down	Chr2:251769453:251895514:+	1433	sense-overlapping
TCONS_00016296	4.68149	2.22697	0.03862	Up	Chr2:260062488:260063458:+	798	antisense
TCONS_00016502	2.43631	1.2847	0.0212773	Up	Chr2:39068766:39121855:-	4238	intergenic
TCONS_00016784	0.201395	-2.3119	0.000242557	Down	Chr2:149440443:149444333:-	1103	sense-overlapping
TCONS_00017370	8.75781	3.13057	1.94e-05	Up	Chr2:251529355:251613566:-	388	sense-overlapping
TCONS_00017371	7.95093	2.99112	2.09e-05	Up	Chr2:251529355:251613566:-	389	sense-overlapping
TCONS_00017479	3.89603	1.962	0.00676344	Up	Chr20:3677485:3677846:+	317	sense-overlapping
TCONS_00018193	80.4872	6.33069	4.99e-05	Up	Chr20:12264501:12273064:-	1731	intronic
TCONS_00018593	9.40769	3.23384	0.014024	Up	Chr3:14809986:14813025:+	672	intergenic
TCONS_00018687	0.33944	-1.55877	0.00196831	Down	Chr3:52385056:52652019:+	10743	antisense
TCONS_00018689	0.435544	-1.19911	0.0493756	Down	Chr3:52533385:52643114:+	2283	antisense
TCONS_00018768	0.295628	-1.75814	0.0148365	Down	Chr3:61674938:61676580:+	1480	intergenic
TCONS_00018897	0.242866	-2.04177	0.00534752	Down	Chr3:81703400:81727302:+	2305	intergenic
TCONS_00019080	0.282428	-1.82404	0.0100542	Down	Chr3:116937898:116958060:+	1848	sense-overlapping
TCONS_00019081	0.266396	-1.90836	0.00747701	Down	Chr3:116937898:116958060:+	1846	sense-overlapping
TCONS_00019082	0.295149	-1.76048	0.00991128	Down	Chr3:116937898:116958060:+	1844	sense-overlapping
TCONS_00019514	0.381854	-1.38891	0.00483381	Down	Chr3:172351933:172428493:+	339	sense-overlapping
TCONS_00019530	0.301858	-1.72806	0.00583267	Down	Chr3:173684976:173702579:+	666	intergenic
TCONS_00019774	0.425124	-1.23405	0.00890769	Down	Chr3:10553510:10584893:-	2954	sense-overlapping
TCONS_00020308	4.73006	2.24186	6.6e-05	Up	Chr3:114310521:114312355:-	329	intergenic
TCONS_00020362	0.12685	-2.97881	0.00991101	Down	Chr3:122049519:122050558:-	753	intronic
TCONS_00020622	7.49034	2.90503	1.02e-09	Up	Chr3:160872503:160905328:-	1613	sense-overlapping
TCONS_00020734	0.225065	-2.15159	0.00334547	Down	Chr3:175763372:175766582:-	970	intergenic
TCONS_00020817	6.77464	2.76014	0.000299365	Up	Chr4:7091481:7114660:+	389	sense-overlapping
TCONS_00020858	4.80507	2.26456	0.0172641	Up	Chr4:14039923:14071173:+	253	intergenic
TCONS_00021042	0.356232	-1.48911	0.0233906	Down	Chr4:58076297:58124131:+	2087	antisense
TCONS_00021043	0.326995	-1.61266	0.0312061	Down	Chr4:58078881:58085397:+	2793	intronic
TCONS_00021044	0.353421	-1.50054	0.00168528	Down	Chr4:58078881:58093050:+	3964	intronic
TCONS_00021048	0.344649	-1.5368	0.0419621	Down	Chr4:58083443:58085415:+	1935	intronic
TCONS_00021057	0.316881	-1.65799	0.0248472	Down	Chr4:59452484:59512644:+	1110	antisense
TCONS_00021058	0.296531	-1.75374	0.0131194	Down	Chr4:59452488:59537392:+	2373	antisense
TCONS_00021074	0.358416	-1.48029	0.0182377	Down	Chr4:63307199:63309843:+	1142	intergenic
TCONS_00021177	0.370606	-1.43204	0.0225552	Down	Chr4:82160376:82161790:+	990	intronic
TCONS_00021415	19.2612	4.26763	5.3e-05	Up	Chr4:124714446:124720080:+	2036	intronic
TCONS_00021483	0.496979	-1.00874	0.0400213	Down	Chr4:146195731:146225425:+	2497	sense-overlapping
TCONS_00021531	4.89943	2.29262	0.00327124	Up	Chr4:150173945:150185624:+	283	antisense
TCONS_00022417	2.77327	1.47159	0.034612	Up	Chr4:153055221:153055746:-	233	intronic
TCONS_00023177	10.6599	3.41413	0.00763779	Up	Chr5:136830574:136835856:+	1424	intronic
TCONS_00023700	0.351532	-1.50827	0.0319993	Down	Chr5:9355498:9417302:-	1238	sense-overlapping
TCONS_00024122	11.699	3.54832	2.77e-07	Up	Chr5:127396502:127404214:-	1794	intergenic
TCONS_00024148	2.99764	1.58383	0.0203569	Up	Chr5:128746451:128749965:-	1869	intronic
TCONS_00024500	12.6188	3.6575	8.7e-09	Up	Chr5:153210612:153283613:-	223	sense-overlapping
TCONS_00024599	0.296091	-1.75589	0.046772	Down	Chr5:161144969:161146336:-	1328	intronic
TCONS_00024638	0.120424	-3.0538	0.0049027	Down	Chr5:165022396:165027851:-	705	intergenic
TCONS_00024795	16.6076	4.05377	0.0188685	Up	Chr6:6297638:6301021:+	1216	intergenic
TCONS_00024876	9.3052	3.21804	2.83e-05	Up	Chr6:24527501:24534426:+	3263	intergenic
TCONS_00024942	3.85938	1.94837	0.0267348	Up	Chr6:33627687:33640270:+	1092	intergenic
TCONS_00025347	0.283058	-1.82083	0.00486001	Down	Chr6:111329939:111340277:+	3088	antisense
TCONS_00025601	2.52495	1.33626	0.010396	Up	Chr6:6558749:6559372:-	232	intergenic
TCONS_00025893	7.97869	2.99615	2.11e-05	Up	Chr6:78077077:78095642:-	306	intronic
TCONS_00025894	5.47085	2.45176	0.0122016	Up	Chr6:78077077:78143278:-	401	sense-overlapping
TCONS_00026159	2.71154	1.43911	0.0173818	Up	Chr6:128633178:128649243:-	4031	sense-overlapping
TCONS_00026300	4.57825	2.1948	0.00535535	Up	Chr7:3165245:3224671:+	389	sense-overlapping
TCONS_00026304	7.29789	2.86748	7.13e-05	Up	Chr7:3212123:3224671:+	387	sense-overlapping
TCONS_00026342	0.336428	-1.57163	0.0487415	Down	Chr7:11493741:11562020:+	631	sense-overlapping
TCONS_00026343	0.412113	-1.27889	0.0327447	Down	Chr7:11493783:11562020:+	607	sense-overlapping
TCONS_00026425	0.292438	-1.7738	0.0232478	Down	Chr7:13751100:13755737:+	455	antisense
TCONS_00026900	192.291	7.58715	0.0222961	Up	Chr7:122665947:122710909:+	376	sense-overlapping
TCONS_00026901	0.167093	-2.58128	0.00011594	Down	Chr7:122667687:122710912:+	381	sense-overlapping
TCONS_00026902	0.184127	-2.44123	0.000755404	Down	Chr7:122671774:122710910:+	379	sense-overlapping
TCONS_00028266	4.60118	2.202	0.0083504	Up	Chr8:12023956:12076660:+	1728	intronic
TCONS_00028551	3.55828	1.83118	0.0347789	Up	Chr8:57760604:57831288:+	348	antisense
TCONS_00028677	0.196529	-2.34719	0.000138094	Down	Chr8:70860688:70909466:+	280	sense-overlapping
TCONS_00029397	71.2106	6.15402	0.00810689	Up	Chr8:50414804:50507299:-	977	antisense
TCONS_00029972	0.361766	-1.46687	0.0106699	Down	Chr9:8357176:8466335:+	427	sense-overlapping
TCONS_00030022	0.243265	-2.0394	0.000143044	Down	Chr9:12173989:12424861:+	394	sense-overlapping
TCONS_00030127	0.331069	-1.5948	0.00464126	Down	Chr9:27304633:27351302:+	357	sense-overlapping
TCONS_00030629	0	#NAME?	4.5e-05	Down	Chr9:113963734:114003822:+	282	sense-overlapping
TCONS_00030943	0.431576	-1.21231	0.0135333	Down	Chr9:49795091:49827898:-	394	intergenic
TCONS_00031297	0.398679	-1.3267	0.00893346	Down	ChrX:2547782:2621811:+	767	sense-overlapping
TCONS_00031672	0.33203	-1.59061	0.00154638	Down	ChrX:107632644:107633574:+	439	intergenic
TCONS_00031737	0.296051	-1.75608	0.00150433	Down	ChrX:122973411:122976651:+	3199	intergenic
TCONS_00032291	0.329602	-1.6012	0.00236111	Down	ChrX:147502164:147582352:-	5511	sense-overlapping
