# Supplementary material for: Changes in long non-coding RNA transcriptomic profiles after ischemia-reperfusion injury in rat spinal cord
Source: PeerJ. 2020 Jan 6;8:e8293. doi: 10.7717/peerj.8293 (PMC6951290; doi:10.7717/peerj.8293)
Supplement: Supplemental Information 3 [file peerj-08-8293-s003.xlsx]

## Sheet: Sheet1
id	foldChange	log2FoldChange	pval	up_down	gene
NM_001001511.2	8.97158	3.16536	0.00195951	Up	Gcnt2
NM_001001514.2	0.481291	-1.05502	0.0313799	Down	Ablim2
NM_001001515.1	0	#NAME?	0.0127905	Down	Lmo7
NM_001001799.1	0.434932	-1.20114	0.0103917	Down	Tmem35
NM_001002016.2	7.19509	2.84701	0.00215477	Up	Lmna
NM_001002807.2	9.08507	3.1835	1.71e-05	Up	Clic1
NM_001002819.2	47.3719	5.56596	2.14e-05	Up	Gfpt2
NM_001002823.2	0.398467	-1.32747	0.00585734	Down	Wnk1
NM_001002827.1	2.5857	1.37055	0.0359456	Up	Notch4
NM_001003401.1	2.50999	1.32768	0.00318892	Up	Enc1
NM_001003705.2	Inf	Inf	0.0108702	Up	Slc38a7
NM_001003707.1	85.1795	6.41243	2.92e-05	Up	Clec4d
NM_001003958.1	Inf	Inf	0.00297898	Up	Dnmt3a
NM_001004084.2	2.82578	1.49865	0.0122239	Up	RT1-Bb
NM_001004095.1	73.326	6.19625	0.0060042	Up	S100a11
NM_001004132.1	0.233166	-2.10057	0.00455533	Down	Cdk16
NM_001004199.1	2.08805	1.06215	0.0402189	Up	Tax1bp1
NM_001004202.2	21.7041	4.43989	0.000664458	Up	Ccl6
NM_001004206.1	2.84724	1.50957	0.00442403	Up	Pa2g4
NM_001004210.2	2.92523	1.54855	0.000392895	Up	Xbp1
NM_001004242.1	17.5291	4.13168	7.23e-07	Up	Arhgap8
NM_001004245.1	2.21165	1.14512	0.0148325	Up	Esam
NM_001004246.2	8.85614	3.14668	0.0140578	Up	Ttc12
NM_001004256.1	0.385624	-1.37473	0.00670848	Down	Sirt5
NM_001004260.1	0.0546616	-4.19333	0.0296958	Down	Slc22a18
NM_001004272.1	2.56547	1.35922	0.0152821	Up	Phf23
NM_001004283.1	2.18925	1.13043	0.0109859	Up	Eif3d
NM_001004418.2	4.34482	2.1193	0.0302798	Up	Tacc2
NM_001004444.1	2.42446	1.27767	0.00896171	Up	Zbtb1
NM_001004446.1	0.446845	-1.16215	0.0130447	Down	Smarca2
NM_001005384.1	34.2554	5.09826	2.2e-07	Up	Osmr
NM_001005536.1	2.37983	1.25086	0.0108868	Up	Srfbp1
NM_001005552.1	2.05816	1.04136	0.0302335	Up	MGC95208
NM_001005883.1	3.102	1.6332	0.00125815	Up	Pi4k2b
NM_001005886.1	0.413082	-1.2755	0.0175285	Down	Dagla
NM_001005892.2	7.47119	2.90134	0.016528	Up	Spi1
NM_001005896.1	77.2351	6.27119	8.93e-05	Up	Clec4b2
NM_001005897.1	103.439	6.69263	6.29e-06	Up	Clec4e
NM_001005898.3	0.415708	-1.26636	0.00594026	Down	Omg
NM_001006955.2	2.03198	1.02289	0.024031	Up	Cldnd1
NM_001006958.1	2.41104	1.26966	0.0113475	Up	Sdad1
NM_001006961.1	Inf	Inf	1.78e-09	Up	Osm
NM_001006962.1	2.87204	1.52208	0.00193768	Up	Tinf2
NM_001006974.2	4.27458	2.09578	0.000315213	Up	Ccdc86
NM_001006976.1	2.79255	1.48158	0.00185583	Up	Tars
NM_001006987.1	5.54267	2.47058	0.0447586	Up	Spg21
NM_001006993.1	0.144354	-2.79231	0.00797664	Down	Sgcg
NM_001006996.1	4.2017	2.07097	0.0011245	Up	Ddx18
NM_001007004.1	0.371406	-1.42893	0.00110841	Down	Tuba4a
NM_001007008.1	0.405832	-1.30104	0.00451096	Down	Chchd10
NM_001007013.1	Inf	Inf	0.0010119	Up	Gphb5
NM_001007015.1	60.7944	5.92587	0.0319387	Up	Rnase2
NM_001007020.2	0.39855	-1.32717	0.019581	Down	Hmgn3
NM_001007144.1	42.6108	5.41315	2.41e-07	Up	Plin2
NM_001007150.1	0.499323	-1.00196	0.0361781	Down	Stau2
NM_001007557.1	2.05043	1.03593	0.0485905	Up	Adgre1
NM_001007612.1	132.631	7.05128	1.27e-34	Up	Ccl7
NM_001007617.1	12.9253	3.69212	0.00349791	Up	Nuak2
NM_001007621.1	2.40936	1.26865	0.0428561	Up	Dhrs1
NM_001007623.1	2.24714	1.16809	0.0246623	Up	Mettl6
NM_001007628.2	0.398536	-1.32722	0.00741823	Down	Cxxc5
NM_001007641.1	2.85284	1.5124	0.000802735	Up	Rnd3
NM_001007658.1	0.355725	-1.49117	0.00167613	Down	Them6
NM_001007667.2	5.58979	2.48279	0.00523436	Up	Sat1
NM_001007668.1	0.297177	-1.7506	0.0431879	Down	Ubald1
NM_001007672.1	0.44828	-1.15753	0.0223194	Down	Tmem98
NM_001007675.1	2.52858	1.33833	0.0225745	Up	C1qtnf1
NM_001007677.1	4.77159	2.25447	0.0383901	Up	Lyl1
NM_001007691.1	7.38396	2.8844	0.000295171	Up	Prss23
NM_001007694.1	11.4052	3.51162	1.42e-08	Up	Ifit3
NM_001007707.1	3.15104	1.65583	0.000760702	Up	Hgh1
NM_001007713.1	4.27451	2.09576	1.3e-06	Up	Tmbim1
NM_001007721.1	5.35243	2.42019	0.0277222	Up	Emp2
NM_001007727.1	0.412983	-1.27585	0.00953596	Down	Lypd1
NM_001007730.2	0.381817	-1.38905	0.00226994	Down	Cabp7
NM_001007735.1	5.81166	2.53895	0.00020804	Up	Sertad1
NM_001007738.1	2.52041	1.33366	0.00648104	Up	Tmem252
NM_001007741.1	2.93666	1.55418	0.00406347	Up	Isg20l2
NM_001007745.1	2.84051	1.50615	0.0132512	Up	Tmem43
NM_001007754.1	5.69396	2.50943	0.000982739	Up	Rassf1
NM_001007759.1	5.03163	2.33103	1.36e-06	Up	2018-03-03
NM_001007797.1	2.17704	1.12237	0.0195892	Up	Arrdc3
NM_001008280.1	2.0306	1.0219	0.0183091	Up	Lrrc59
NM_001008295.1	5.17736	2.37222	0.0267174	Up	Fip1l1
NM_001008296.1	0.375719	-1.41228	0.013607	Down	Emc9
NM_001008315.1	2.2538	1.17236	0.0254299	Up	Ltbr
NM_001008320.1	2.9129	1.54246	0.0050454	Up	Rhoj
NM_001008321.1	16.2257	4.02021	8.88e-05	Up	Gadd45b
NM_001008328.1	4.99688	2.32103	0.0211546	Up	Parp3
NM_001008342.1	0.392085	-1.35076	0.0156554	Down	Akr1e2
NM_001008344.1	2.71661	1.44181	0.000938218	Up	Etf1
NM_001008348.1	2.77601	1.47301	0.00082787	Up	Frmd8
NM_001008349.1	5.29964	2.40589	0.000226976	Up	Nfkb2
NM_001008360.1	0.488788	-1.03272	0.0485181	Down	Cdip1
NM_001008363.1	4.511	2.17345	6.21e-07	Up	Zfand2a
NM_001008369.1	0.472077	-1.08291	0.0173703	Down	Pitpnm1
NM_001008380.1	0.362983	-1.46203	0.0114521	Down	Dis3l
NM_001008384.1	7.94131	2.98938	0.0378477	Up	Rac2
NM_001008385.1	6.7159	2.74758	0.000152987	Up	Pmaip1
NM_001008398.2	6.03582	2.59355	0.00311956	Up	Gimap9
NM_001008510.1	5.40137	2.43333	0.0220679	Up	Isg20
NM_001008518.2	38.2803	5.25853	0.0011908	Up	MGC105649
NM_001008521.1	2.07908	1.05594	0.011752	Up	Twf1
NM_001008555.1	0.359378	-1.47643	0.00441451	Down	Slc10a4
NM_001008558.1	0.452477	-1.14408	0.012498	Down	Ndn
NM_001008562.1	4.88256	2.28764	3.25e-06	Up	Lmcd1
NM_001008721.1	3.59277	1.84509	0.0277809	Up	Ebna1bp2
NM_001008765.1	21.4896	4.42557	9.13e-05	Up	Igtp
NM_001008770.3	0.433752	-1.20506	0.0225525	Down	Cmbl
NM_001008773.2	4.75032	2.24803	0.000129767	Up	Eif1a
NM_001008829.1	2.58865	1.3722	0.0101812	Up	RT1-A2
NM_001008831.3	2.31941	1.21376	0.0355977	Up	RT1-Ba
NM_001008842.1	5.70667	2.51265	1.2e-07	Up	RT1-CE4
NM_001008847.2	3.29716	1.72123	0.000558977	Up	RT1-Da
NM_001008858.1	7.42629	2.89264	0.00378056	Up	RT1-T24-1
NM_001008880.1	0.294385	-1.76422	0.000106018	Down	Scn4b
NM_001008884.2	2.25803	1.17506	0.0408126	Up	RT1-Db1
NM_001008891.2	2.03664	1.02619	0.0210836	Up	Ssr1
NM_001008893.1	0.0182351	-5.77714	0.0391888	Down	Ldhd
NM_001009176.2	7.83895	2.97066	0.0277258	Up	Trim10
NM_001009255.1	2.34331	1.22855	0.0146624	Up	Srsf9
NM_001009493.1	17.0347	4.09041	0.00190659	Up	Oas3
NM_001009536.1	6.57507	2.71701	0.000237168	Up	Trim25
NM_001009541.1	5.79828	2.53562	4.71e-08	Up	Ier2
NM_001009617.1	0.408601	-1.29123	0.00468106	Down	Mest
NM_001009632.1	17.5237	4.13123	0.000259901	Up	G0s2
NM_001009640.1	3.01581	1.59255	0.00152557	Up	Utp4
NM_001009660.1	3.56415	1.83356	0.0155833	Up	Spsb2
NM_001009665.1	0.35467	-1.49545	0.00227425	Down	Ebag9
NM_001009671.1	3.92592	1.97303	3.23e-05	Up	Coq10b
NM_001009675.1	0.450162	-1.15149	0.0226769	Down	Tceal1
NM_001009678.1	4.8937	2.29092	0.00196063	Up	Nepro
NM_001009681.1	15.073	3.9139	2.87e-07	Up	Oasl
NM_001009687.1	2.44492	1.28979	0.0127751	Up	Riok2
NM_001009702.1	2.59761	1.37718	0.00454517	Up	Rrp15
NM_001009709.1	2.80037	1.48562	0.0237831	Up	Tmem140
NM_001009716.1	0.359783	-1.4748	0.00843361	Down	Asphd2
NM_001009717.1	10.4165	3.3808	0.0052754	Up	Lrg1
NM_001009720.2	3.12466	1.6437	0.00014981	Up	Srsf2
NM_001009831.2	0.406136	-1.29996	0.00620102	Down	Atl1
NM_001009919.1	16.3269	4.02918	0.0144134	Up	Ly49si3
NM_001009965.2	21.0009	4.39238	0.00731322	Up	Tsku
NM_001009967.2	0.0288773	-5.11392	0.00278861	Down	Pip5k1c
NM_001010945.1	3.4143	1.77159	9.31e-05	Up	Tmem120a
NM_001010953.1	0.494166	-1.01693	0.0304763	Down	Rnd2
NM_001010965.1	0.0195692	-5.67527	0.0314166	Down	Mok
NM_001010968.2	4.16352	2.0578	6.41e-05	Up	Eng
NM_001011665.2	2.34731	1.23101	0.0202519	Up	Trim26
NM_001011898.1	5.46481	2.45017	0.0148919	Up	Hcls1
NM_001011904.1	4.53628	2.18151	0.0258693	Up	Rnf10
NM_001011909.1	Inf	Inf	4.75e-05	Up	Gpatch2
NM_001011915.1	2.69618	1.43092	0.00175959	Up	Fermt2
NM_001011918.1	2.19714	1.13563	0.0225102	Up	Anxa11
NM_001011922.1	4.20294	2.0714	0.0199348	Up	Nedd9
NM_001011936.1	4.93687	2.3036	2.76e-07	Up	Bag3
NM_001011937.1	0	#NAME?	0.00758373	Down	Doc2g
NM_001011942.1	0.431548	-1.21241	0.0166514	Down	Cnnm2
NM_001011944.1	3.28671	1.71664	0.0352258	Up	Slc37a1
NM_001011947.1	11.7158	3.55038	0.0122364	Up	Rai14
NM_001011957.1	Inf	Inf	0.0473685	Up	Ell3
NM_001011974.2	8.176	3.0314	0.000274107	Up	Akap2
NM_001011979.2	22.6519	4.50156	0.0257966	Up	Tardbp
NM_001011980.1	3.42939	1.77795	0.000962171	Up	Ppan
NM_001011987.1	11.0031	3.45984	0.0114328	Up	Glipr1
NM_001011995.1	4.55565	2.18766	0.00352021	Up	Tuba1c
NM_001011997.1	2.8256	1.49856	0.00106965	Up	Tmod3
NM_001012005.2	3.55984	1.83181	0.00430043	Up	Nid2
NM_001012007.1	3.94066	1.97844	0.00271297	Up	Irgm
NM_001012008.1	16.3811	4.03396	0.00239077	Up	Zfp18
NM_001012014.1	3.30807	1.72599	0.00138724	Up	Ftsj3
NM_001012022.1	2.83957	1.50567	0.0343796	Up	Cldn4
NM_001012029.1	14.7382	3.88149	0.00397122	Up	Mnda
NM_001012030.1	2.54521	1.34779	0.00281406	Up	Zfp281
NM_001012032.1	0.248508	-2.00864	0.00496806	Down	Arhgap24
NM_001012036.1	2.23633	1.16114	0.0125502	Up	Utp3
NM_001012037.1	0.490814	-1.02675	0.040006	Down	Lias
NM_001012041.1	2.84466	1.50826	0.00922809	Up	Irf9
NM_001012044.1	13.1947	3.72188	1.18e-05	Up	Lcp1
NM_001012046.1	11.2563	3.49266	2.87e-06	Up	Spry2
NM_001012048.1	4.38731	2.13334	0.0468672	Up	Sh2d4a
NM_001012049.1	Inf	Inf	4.29e-13	Up	Mfap3l
NM_001012065.1	4.45664	2.15596	0.0102497	Up	Adck4
NM_001012067.1	2.40127	1.2638	0.0164029	Up	Grwd1
NM_001012068.1	0.408408	-1.29192	0.048164	Down	Uros
NM_001012071.1	9.54425	3.25463	0.0447793	Up	Gsto2
NM_001012075.1	0.405365	-1.30271	0.00418157	Down	Tspyl4
NM_001012086.1	13.1447	3.71641	0.033355	Up	Cytip
NM_001012089.1	6.75482	2.75592	0.00196664	Up	Dusp2
NM_001012103.1	0.498298	-1.00492	0.0319526	Down	Trim32
NM_001012112.1	0.00487105	-7.68155	0.00377641	Down	Ankrd9
NM_001012116.1	0.333455	-1.58444	0.0109756	Down	Spag1
NM_001012121.1	4.18655	2.06576	0.00702678	Up	Prr5
NM_001012126.1	0.12621	-2.9861	0.0181974	Down	Slc35g2
NM_001012133.1	6.52393	2.70574	0.0161139	Up	Sp140
NM_001012137.1	2.21932	1.15012	0.025304	Up	Fus
NM_001012143.2	2.59896	1.37794	0.00461758	Up	Jmjd6
NM_001012154.1	3.74709	1.90577	0.0011971	Up	Tbrg4
NM_001012155.1	Inf	Inf	1.85e-05	Up	Tm9sf1
NM_001012164.1	31.3522	4.97049	0.000182339	Up	Adgre5
NM_001012169.1	2.5252	1.3364	0.048088	Up	Zfp143
NM_001012174.1	2.22133	1.15143	0.00918678	Up	Fkbp5
NM_001012205.1	0.395021	-1.34	0.0104842	Down	Dpp10
NM_001012206.2	2.33714	1.22474	0.00508859	Up	Phlda3
NM_001012224.1	6.37882	2.67329	0.014828	Up	Nfe2
NM_001012237.1	0.260804	-1.93896	0.00556489	Down	Fam20a
NM_001012345.1	3.8608	1.9489	0.0283236	Up	Dgat2
NM_001012347.1	0.369999	-1.43441	0.00633459	Down	Rgs7bp
NM_001012349.2	0.471593	-1.08439	0.0344848	Down	Plpp7
NM_001012353.1	8.06307	3.01133	0.00464321	Up	MGC108823
NM_001012357.1	49.3719	5.62562	4.14e-05	Up	Ccl9
NM_001012463.3	2.10663	1.07493	0.0289712	Up	Ak6
NM_001012470.1	2.11565	1.0811	0.0130289	Up	Irf2bpl
NM_001012471.1	3.04583	1.60683	0.000507242	Up	Zbtb38
NM_001012621.1	0.328155	-1.60755	0.0352622	Down	Slc13a4
NM_001012738.1	0.379102	-1.39934	0.00224213	Down	Ckmt1b
NM_001012748.1	0.146441	-2.77161	0.000423556	Down	Cdh20
NM_001013060.1	0.415227	-1.26803	0.00652824	Down	Rit2
NM_001013062.1	47.3836	5.56632	0.000166806	Up	Thbs1
NM_001013065.1	7.90636	2.98301	0.0322335	Up	Ggn
NM_001013066.1	0	#NAME?	0.0485485	Down	Sipa1l3
NM_001013069.1	0.452288	-1.14469	0.0234094	Down	Stard10
NM_001013074.1	2.82283	1.49714	0.00720889	Up	Pknox1
NM_001013086.1	9.75317	3.28587	0.00484211	Up	Capg
NM_001013101.1	0.472046	-1.083	0.0217787	Down	Moap1
NM_001013109.1	3.78207	1.91918	0.0196389	Up	Dapk2
NM_001013127.1	6.27327	2.64922	0.00721306	Up	Tagln2
NM_001013137.2	4.85246	2.27872	0.0149975	Up	Cxcl14
NM_001013138.2	2.42077	1.27547	0.0478251	Up	Tspan17
NM_001013144.2	2.36393	1.24119	0.0209269	Up	Slc12a7
NM_001013146.1	12.8981	3.68909	6.17e-08	Up	Fosl2
NM_001013147.1	5.97965	2.58006	0.00420723	Up	Axl
NM_001013153.1	2.87613	1.52413	0.0019112	Up	Ubtd1
NM_001013158.1	4.70763	2.235	1.64e-05	Up	B3galnt1
NM_001013163.2	0.402218	-1.31395	0.0158954	Down	Bmyc
NM_001013166.1	87.2641	6.44732	0.00568244	Up	Gsg1
NM_001013167.1	4.27791	2.09691	0.0485848	Up	Wasf2
NM_001013181.1	0.374914	-1.41537	0.0253257	Down	Zbtb16
NM_001013184.1	3.10736	1.63569	0.00359662	Up	Hmgn1
NM_001013191.1	2.23534	1.1605	0.00821549	Up	Cbfb
NM_001013200.1	2.04625	1.03298	0.0422531	Up	Anp32e
NM_001013430.1	11.7904	3.55954	0.0244568	Up	Rhoh
NM_001013431.1	2.12467	1.08724	0.0229116	Up	Chchd4
NM_001013865.1	2.76525	1.46741	0.00331153	Up	Tmem39a
NM_001013894.1	Inf	Inf	0.0244735	Up	Lilrb4
NM_001013906.1	0.420751	-1.24896	0.0271206	Down	Lhfpl5
NM_001013913.1	0.101619	-3.29875	0.000423533	Down	Slc16a4
NM_001013923.1	0.477817	-1.06547	0.0191183	Down	Ndrg3
NM_001013931.1	2.52769	1.33782	0.0365884	Up	Fam214b
NM_001013936.2	0.42075	-1.24896	0.0228472	Down	Slc25a34
NM_001013938.1	3.20566	1.68062	0.000910077	Up	Vwa1
NM_001013948.1	0.494092	-1.01715	0.025565	Down	Ankrd46
NM_001013953.1	0.244825	-2.03018	0.0158789	Down	Ccdc153
NM_001013965.1	0.227581	-2.13555	0.0423068	Down	Tekt4
NM_001013969.1	0.117385	-3.09068	0.00179754	Down	Slc46a1
NM_001013975.2	0.131244	-2.92968	0.030954	Down	Notum
NM_001014002.1	2.40262	1.26461	0.00854244	Up	Mak16
NM_001014023.1	2.14561	1.10139	0.0458312	Up	Trim5
NM_001014044.1	3.57917	1.83963	0.020936	Up	Tifa
NM_001014058.1	3.77243	1.91549	0.00250763	Up	Usp18
NM_001014071.1	4.9866	2.31806	7.52e-07	Up	Errfi1
NM_001014078.1	4.8183	2.26852	0.00965846	Up	Wdr89
NM_001014090.1	5.14871	2.36421	0.00870438	Up	Oaf
NM_001014097.1	2.55431	1.35293	0.0189169	Up	Cdv3
NM_001014098.1	0.303079	-1.72224	0.0335404	Down	Ccdc51
NM_001014099.1	0.0274428	-5.18743	0.0465439	Down	Paqr8
NM_001014100.1	21.356	4.41657	0.00485441	Up	Neurl3
NM_001014107.1	2.82047	1.49594	0.0296141	Up	Mospd1
NM_001014110.1	5.59093	2.48309	0.045986	Up	Prickle3
NM_001014113.2	3.26473	1.70696	0.00124568	Up	Utp14a
NM_001014114.1	0.438805	-1.18835	0.0115187	Down	RGD1305733
NM_001014135.1	2.08005	1.05662	0.0126403	Up	Wdr1
NM_001014137.2	0.419024	-1.25489	0.0127055	Down	LOC361016
NM_001014149.1	0.368096	-1.44184	0.00191667	Down	Rell2
NM_001014155.1	2.87198	1.52205	0.0104625	Up	Taf1c
NM_001014156.1	0.400266	-1.32097	0.0137015	Down	Dbndd1
NM_001014163.1	0.328912	-1.60423	0.000486636	Down	Cend1
NM_001014166.1	5.5595	2.47496	0.000253988	Up	Il33
NM_001014178.2	0.445005	-1.16811	0.0111608	Down	Fam69b
NM_001014182.1	9.18629	3.19948	0.0169668	Up	Mall
NM_001014183.1	0.379435	-1.39807	0.00261559	Down	Lamp5
NM_001014184.1	Inf	Inf	0.00190885	Up	Lpin3
NM_001014190.1	0.198357	-2.33383	3.31e-05	Down	Tmem246
NM_001014200.1	2.27077	1.18318	0.0173374	Up	Sppl2b
NM_001014205.1	2.37618	1.24865	0.0447434	Up	Tmem123
NM_001014209.1	397.287	8.63404	0.000524759	Up	Plet1
NM_001014216.1	5.60047	2.48555	8.27e-05	Up	Nabp1
NM_001014244.1	2.81181	1.4915	0.0108742	Up	Cyb5r2
NM_001014269.1	35.3931	5.1454	0.0129486	Up	Lrrfip1
NM_001014843.2	4.50496	2.17151	0.0188247	Up	Fcmr
NM_001015010.1	0.398136	-1.32867	0.00867811	Down	Cib2
NM_001015020.1	15.191	3.92515	7.5e-07	Up	Tgif1
NM_001015022.3	3.47362	1.79644	0.000283223	Up	Tbc1d10a
NM_001015032.3	7.41686	2.89081	0.00293298	Up	Galnt3
NM_001017376.1	0.441802	-1.17853	0.0141509	Down	Phyhip
NM_001017377.1	0.497115	-1.00835	0.0362233	Down	Paqr4
NM_001017452.1	0.0968034	-3.3688	0.0234073	Down	Nsun7
NM_001017457.2	0.425103	-1.23412	0.0408848	Down	Degs2
NM_001017473.1	2.86988	1.52099	0.0316515	Up	Rmnd5b
NM_001017478.1	8.61005	3.10602	4.73e-11	Up	Cxcl16
NM_001017480.1	0.410407	-1.28487	0.0169585	Down	Hoxb7
NM_001017500.1	0.430271	-1.21668	0.0366492	Down	LOC498368
NM_001017502.1	2.07013	1.04972	0.0297517	Up	Ccdc117
NM_001024234.1	0.338926	-1.56096	0.00188171	Down	Wscd1
NM_001024250.1	2.39574	1.26047	0.00492888	Up	Bop1
NM_001024259.1	0.0627043	-3.99529	0.0340604	Down	Bmpr1b
NM_001024269.1	2.5279	1.33794	0.00604573	Up	Luc7l
NM_001024275.1	2.44034	1.28708	0.00669928	Up	Rassf4
NM_001024282.1	15.8715	3.98837	0.0240261	Up	Hist1h2af
NM_001024305.2	2.2187	1.14971	0.00969268	Up	Prpf38b
NM_001024306.1	4.0913	2.03256	0.000776301	Up	Gar1
NM_001024327.1	0.277845	-1.84765	0.0176836	Down	Zfp467
NM_001024339.1	0.364981	-1.45411	0.0157119	Down	Tuba8
NM_001024341.1	0.289291	-1.78941	0.00184064	Down	Fam110b
NM_001024344.1	19.3048	4.27089	0.0372793	Up	Sit1
NM_001024346.1	0	#NAME?	6.01e-06	Down	LOC500475
NM_001024348.1	8.33948	3.05996	0.0157558	Up	LOC500567
NM_001024349.2	25.5448	4.67496	0.022482	Up	Tnfrsf18
NM_001024354.1	Inf	Inf	0.000432266	Up	Lrrc14
NM_001024368.1	2.7827	1.47648	0.00543011	Up	Slc10a3
NM_001024761.1	10.3213	3.36755	0.025021	Up	Lrrfip2
NM_001024769.1	2.07648	1.05414	0.0282749	Up	Cdc73
NM_001024771.1	4.69819	2.23211	3.29e-05	Up	Tnip2
NM_001024781.1	3.22694	1.69017	0.0408229	Up	Sox18
NM_001024789.1	0.416999	-1.26189	0.00637426	Down	Nap1l2
NM_001024796.1	2.06376	1.04528	0.0294238	Up	Spin1
NM_001024869.1	2.92885	1.55034	0.0111002	Up	Wwtr1
NM_001024883.1	0.459335	-1.12238	0.0152938	Down	Pomk
NM_001024887.1	152.776	7.25528	0.000490835	Up	Sigirr
NM_001024897.1	2.09139	1.06446	0.0268427	Up	Ehd2
NM_001024970.2	2.06466	1.0459	0.0227028	Up	Sde2
NM_001024979.1	75.1372	6.23146	0.00100307	Up	Gpatch4
NM_001024980.1	0.444651	-1.16926	0.0436787	Down	Ankrd34a
NM_001024982.1	0.397395	-1.33135	0.0220722	Down	Cpne9
NM_001024999.1	3.34947	1.74393	0.0300316	Up	Snx20
NM_001025020.1	0.342042	-1.54775	0.00345459	Down	Syndig1
NM_001025021.1	3.6581	1.8711	0.00110178	Up	Dnajc25
NM_001025027.1	0.494274	-1.01662	0.0317547	Down	Fundc1
NM_001025036.1	2.55419	1.35287	0.00293928	Up	Pum3
NM_001025038.1	0.251358	-1.99218	0.0430619	Down	Mettl24
NM_001025041.1	6.00064	2.58512	3.2e-05	Up	Ier5l
NM_001025042.2	0.392774	-1.34823	0.00949089	Down	Fibin
NM_001025043.1	2.7375	1.45286	0.0196605	Up	Itpripl1
NM_001025046.1	0.408122	-1.29293	0.0057897	Down	Fam131b
NM_001025048.1	0.235523	-2.08606	0.003593	Down	Setmar
NM_001025051.1	35.1535	5.1356	0.00901572	Up	Fam110c
NM_001025064.1	0.202536	-2.30375	0.0012983	Down	Tigar
NM_001025066.1	8.0027	3.00049	1.27e-05	Up	Apol9a
NM_001025122.2	0.370091	-1.43405	0.00803628	Down	Cyhr1
NM_001025126.1	2.85555	1.51377	0.0109173	Up	Rfwd2
NM_001025127.1	0.4965	-1.01013	0.0352498	Down	Rufy3
NM_001025128.1	0.293392	-1.7691	0.0187061	Down	Gatsl3
NM_001025134.1	0.361462	-1.46808	0.0179144	Down	Uqcrq
NM_001025137.2	10.2984	3.36434	9.95e-10	Up	Ier5
NM_001025145.1	0.468074	-1.09519	0.0242078	Down	Zfp365
NM_001025271.1	2.52747	1.3377	0.002769	Up	Sfpq
NM_001025272.1	2.54817	1.34946	0.0112078	Up	Pgam5
NM_001025283.1	6.44969	2.68923	0.00017992	Up	Fam118b
NM_001025415.1	5.15809	2.36684	1.65e-05	Up	Ch25h
NM_001025419.1	4.30861	2.10722	0.00109359	Up	Tax1bp3
NM_001025422.1	3.91106	1.96756	0.0077434	Up	Irak2
NM_001025423.1	0.497638	-1.00683	0.046174	Down	Adhfe1
NM_001025424.1	2.10772	1.07569	0.0464122	Up	Usp3
NM_001025563.1	2.23125	1.15785	0.0279522	Up	Pus1
NM_001025627.1	2.51018	1.32779	0.0210608	Up	P3h2
NM_001025632.2	2.72689	1.44726	0.0429603	Up	Ewsr1
NM_001025638.2	19.0264	4.24993	0.00135132	Up	Stx11
NM_001025643.1	5.03946	2.33327	0.000137341	Up	Fbl
NM_001025650.1	4.91835	2.29817	0.000174787	Up	Dusp11
NM_001025670.1	8.87382	3.14956	0.00383309	Up	Gpat3
NM_001025675.1	14.8732	3.89464	1.56e-05	Up	Tubb6
NM_001025676.1	2.02302	1.01651	0.0348415	Up	Rbm22
NM_001025680.1	Inf	Inf	0.0204224	Up	Gpr4
NM_001025708.1	2.23737	1.1618	0.0257335	Up	Ogfrl1
NM_001025717.1	2.54811	1.34943	0.00849924	Up	Arpc5
NM_001025718.1	0.136342	-2.8747	0.00440027	Down	Tfdp1
NM_001025719.1	2.1319	1.09214	0.0218408	Up	Pxdc1
NM_001025732.1	2.29819	1.2005	0.00616582	Up	Nop56
NM_001025733.2	32.5677	5.02537	1.9e-07	Up	Procr
NM_001025734.1	0.378703	-1.40086	0.0102601	Down	Tada3
NM_001025736.1	2.13144	1.09183	0.0204447	Up	Gnl2
NM_001025739.1	7.83887	2.97064	0.0141342	Up	Rpl11
NM_001025747.1	2.80641	1.48873	0.00352462	Up	Yipf6
NM_001025750.1	7.97383	2.99527	0.0169968	Up	Plek
NM_001025755.1	0.386711	-1.37067	0.0422263	Down	MGC116197
NM_001025762.1	0.424464	-1.23629	0.0227669	Down	Smyd3
NM_001025765.1	0.0692595	-3.85184	0.0108026	Down	Zfp90
NM_001025773.1	8.84793	3.14534	0.00218766	Up	Tnfrsf9
NM_001029915.1	2.95824	1.56474	0.000868496	Up	Brix1
NM_001029919.2	0.482827	-1.05042	0.0210967	Down	Necap1
NM_001029920.1	0.285077	-1.81058	0.000401945	Down	Vstm4
NM_001029923.1	0.382936	-1.38483	0.0244205	Down	Oscp1
NM_001029924.1	6.44401	2.68796	2.43e-05	Up	Stra6
NM_001030025.1	9.04415	3.17699	1.91e-10	Up	Upp1
NM_001030045.1	0.287172	-1.80001	0.0246018	Down	Magi1
NM_001031638.1	7.00523	2.80843	0.0167661	Up	Cd68
NM_001031640.1	2.18639	1.12855	0.0097646	Up	Eif3b
NM_001031642.1	12.4953	3.64331	0.0236015	Up	Serpinb1a
NM_001031658.1	3.70661	1.8901	0.0380727	Up	Slc11a1
NM_001032397.1	60.7339	5.92443	0.0296278	Up	Tcf21
NM_001033062.1	17.7888	4.1529	0.0368023	Up	Cldn23
NM_001033653.1	15.2617	3.93185	2.06e-06	Up	Akap12
NM_001033665.1	0.453699	-1.14019	0.0128554	Down	Bcan
NM_001033671.1	2.40068	1.26345	0.0308828	Up	Bcl2l1
NM_001033672.1	0.339098	-1.56023	0.0257912	Down	Bcl2l1
NM_001033675.1	0.24092	-2.05337	0.00012068	Down	Cabp1
NM_001033676.1	0.41558	-1.2668	0.00684735	Down	Cabp1
NM_001033679.1	0.475663	-1.07199	0.0198812	Down	Prkar1b
NM_001033681.1	2.58014	1.36745	0.0271091	Up	Eif5a
NM_001033686.1	46.9585	5.55332	4.41e-05	Up	Cyp4f18
NM_001033687.1	0.393518	-1.3455	0.0341492	Down	Ushbp1
NM_001033691.1	8.56586	3.0986	0.00133024	Up	Irf7
NM_001033696.1	2.50374	1.32408	0.00670978	Up	Hnrnpdl
NM_001033703.1	12.2799	3.61823	0.0306018	Up	Apobec3b
NM_001033891.1	2.63778	1.39933	0.00957154	Up	Mob1a
NM_001033894.1	0.472041	-1.08302	0.0315153	Down	Jakmip1
NM_001033913.1	Inf	Inf	0.010243	Up	Gimap5
NM_001033955.1	0.219084	-2.19044	1.67e-05	Down	Calca
NM_001033956.1	0.318996	-1.64839	0.00120129	Down	Calca
NM_001033963.1	2.37129	1.24567	0.00710413	Up	Prkx
NM_001033967.2	3.73407	1.90075	0.0441019	Up	Ak2
NM_001033970.1	0.295023	-1.7611	0.000256386	Down	Pip5k1c
NM_001033986.1	3.36677	1.75137	0.000118337	Up	RT1-CE5
NM_001033998.2	7.03982	2.81554	0.0145856	Up	Itgal
NM_001034010.1	0.421592	-1.24608	0.00459657	Down	Tril
NM_001034014.1	0.473055	-1.07992	0.0477385	Down	Asic2
NM_001034020.1	0.446931	-1.16188	0.0211435	Down	Syn2
NM_001034070.1	10.8496	3.43957	0.0141162	Up	Tpm1
NM_001034074.1	6.02647	2.59131	0.0134557	Up	Tpm1
NM_001034088.2	5.37856	2.42722	1.28e-05	Up	Carm1
NM_001034112.1	2.29693	1.1997	0.024837	Up	Mlx
NM_001034137.1	3.88575	1.95819	0.000285157	Up	Sp110
NM_001034140.1	7.54374	2.91528	0.0478424	Up	Baiap2l1
NM_001034149.1	3.88176	1.95671	3.09e-05	Up	Ddi2
NM_001034152.1	0.468262	-1.09461	0.0174458	Down	Nsg2
NM_001034831.1	2.14182	1.09883	0.0454598	Up	Zfp384
NM_001034922.1	2.55504	1.35335	0.0027797	Up	Atad3a
NM_001034925.2	0.249756	-2.00141	0.000191657	Down	Cpt1c
NM_001034926.1	0.378817	-1.40043	0.0239162	Down	Lrrc40
NM_001034932.1	5.15308	2.36544	0.0229552	Up	C1qtnf6
NM_001034934.1	7.06372	2.82043	0.000149478	Up	Arid5a
NM_001034944.1	4.43971	2.15047	0.0192435	Up	Grap2
NM_001034948.1	0.40399	-1.30761	0.0127716	Down	Zfyve19
NM_001034949.1	2.08699	1.06143	0.0475351	Up	Tmco4
NM_001037094.1	2.38699	1.25519	0.0125877	Up	Ctu2
NM_001037096.1	0.359779	-1.47482	0.00151593	Down	Rassf2
NM_001037179.1	3.39534	1.76356	0.00701889	Up	Lrrc8c
NM_001037193.1	0.333121	-1.58588	0.0466158	Down	Acd
NM_001037201.1	5.87204	2.55386	0.000468191	Up	Ddx21
NM_001037204.1	61.5104	5.94276	3.83e-06	Up	Taf1a
NM_001037208.1	3.29305	1.71943	0.000336136	Up	Creld2
NM_001037214.1	4.43712	2.14962	0.000249011	Up	Cdca4
NM_001037217.1	0.464469	-1.10635	0.0148482	Down	Mmd2
NM_001037286.1	2.05825	1.04142	0.0295764	Up	Hnrnpf
NM_001037287.1	4.32699	2.11337	0.00201087	Up	Hnrnpf
NM_001037348.1	2.29303	1.19725	0.0151424	Up	Aimp2
NM_001037352.1	2.06565	1.04659	0.0164721	Up	Eif6
NM_001037353.1	2.46129	1.29942	0.0170698	Up	Etv6
NM_001037355.1	0.436369	-1.19638	0.0257104	Down	Mettl7a
NM_001037356.1	7.72139	2.94886	0.000129721	Up	Pak1ip1
NM_001037357.2	Inf	Inf	1.07e-09	Up	Lilrb3l
NM_001037369.1	0.0620855	-4.0096	0.0318402	Down	Popdc3
NM_001037541.1	31.6121	4.9824	0.017884	Up	Prok2
NM_001037544.1	322.183	8.33174	0.019286	Up	Slc6a14
NM_001037648.1	4.63731	2.21329	0.000554527	Up	Fam105a
NM_001037657.1	4.3224	2.11183	1.11e-05	Up	Rbm12
NM_001037660.1	7.93731	2.98865	0.0158952	Up	Csf2ra
NM_001037769.2	0.445208	-1.16745	0.0443321	Down	Apopt1
NM_001037780.2	7.44674	2.89661	0.00931949	Up	Itgb2
NM_001037787.1	2.1034	1.07272	0.0298722	Up	Polr1d
NM_001037789.1	0.397779	-1.32996	0.00745519	Down	Ccdc28a
NM_001037791.2	4.82102	2.26934	7.17e-05	Up	Wdr43
NM_001037793.2	3.79562	1.92434	0.0211226	Up	Dock8
NM_001037973.1	5.7605	2.52619	0.00889744	Up	Dusp9
NM_001039007.1	14.9308	3.90022	0.0298149	Up	Hrasls5
NM_001039008.1	0.475818	-1.07152	0.0347131	Down	Tmem176a
NM_001039020.1	3.39358	1.76281	0.00013503	Up	Zfp207
NM_001039034.1	3.92	1.97085	0.000160477	Up	Wdr5
NM_001039035.2	3.09121	1.62817	0.000547844	Up	Srsf7
NM_001039325.1	0.381982	-1.38842	0.0155007	Down	Zdhhc22
NM_001039339.1	2.60551	1.38156	0.0133039	Up	Zdhhc18
NM_001039344.2	4.3323	2.11513	0.00272997	Up	Tes
NM_001039505.2	0.300127	-1.73636	0.0268641	Down	Irx2
NM_001039587.1	3.52154	1.81621	0.0142138	Up	Wdr45b
NM_001039608.2	2.15344	1.10664	0.0160143	Up	Mcmbp
NM_001040190.1	0.396136	-1.33593	0.00396	Down	Atcay
NM_001042621.1	2.004	1.00288	0.0316875	Up	Pip5k1a
NM_001044228.1	2.46212	1.2999	0.00534982	Up	Pes1
NM_001044233.2	0.313951	-1.67139	0.000503977	Down	Clec2l
NM_001044238.1	0.442153	-1.17738	0.0202517	Down	Gdpd1
NM_001044250.1	3.9377	1.97735	0.0175298	Up	Stat6
NM_001044265.1	7.72867	2.95022	0.00305239	Up	Steap4
NM_001044279.1	6.37509	2.67245	0.0375514	Up	Liph
NM_001044288.1	2.54787	1.34929	0.00441001	Up	Kti12
NM_001044291.1	2.15539	1.10795	0.0140742	Up	U2af1
NM_001044293.1	0.474157	-1.07656	0.019982	Down	Nap1l5
NM_001044304.1	7.60752	2.92743	0.00050081	Up	Eid3
NM_001047087.2	2.38296	1.25276	0.00358311	Up	Eif3a
NM_001047093.1	0.493137	-1.01994	0.0384006	Down	Klhl5
NM_001047095.1	2.32188	1.21529	0.00746803	Up	Nop16
NM_001047108.1	0.352156	-1.50571	0.0425638	Down	Lbx1
NM_001047116.1	0.490144	-1.02872	0.0356085	Down	Rundc3b
NM_001047858.3	8.01697	3.00306	1.4e-11	Up	Srxn1
NM_001047865.1	0.401345	-1.31708	0.0440731	Down	Cntnap5a
NM_001047871.1	5.98123	2.58044	0.0132427	Up	Ifrd2
NM_001047899.2	17.5467	4.13312	0.0462876	Up	Fyttd1
NM_001047900.1	7.77447	2.95874	0.0303289	Up	Naa25
NM_001047901.1	Inf	Inf	0.016417	Up	Ankle2
NM_001047902.1	2.30487	1.20468	0.0334077	Up	Zc3h11a
NM_001047954.1	18.6386	4.22022	0.0411319	Up	LOC500028
NM_001048044.1	2.42858	1.28011	0.00584066	Up	Cdc42ep3
NM_001048047.1	0.436138	-1.19714	0.0094043	Down	Reep2
NM_001048075.1	4.03727	2.01338	0.0105168	Up	Clec2g
NM_001071777.1	0.221368	-2.17548	2.79e-05	Down	Gpr17
NM_001077200.2	6.70154	2.74449	6.76e-09	Up	Piezo1
NM_001077640.1	6.894	2.78534	1.18e-09	Up	Gadd45g
NM_001077644.1	14.8807	3.89537	0.000130526	Up	Ptgir
NM_001077671.1	15.4	3.94486	1.71e-05	Up	Zc3h12a
NM_001077674.1	6.37163	2.67166	0.0237215	Up	Hlx
NM_001077675.1	10.5914	3.40483	0.00765304	Up	Trim72
NM_001079699.1	3.01686	1.59305	0.0005738	Up	Rrs1
NM_001079700.1	3.38174	1.75777	0.0429172	Up	Cdc42ep1
NM_001079889.2	0.467871	-1.09582	0.0123007	Down	Sephs2
NM_001079890.1	102.955	6.68586	2.43e-14	Up	Gprc5a
NM_001079891.1	0.412645	-1.27703	0.00599067	Down	Magee1
NM_001079893.2	246.694	7.94658	1.66e-06	Up	Dusp14
NM_001079942.1	3.7756	1.91671	0.0392232	Up	Sema3b
NM_001081972.1	0.332957	-1.58659	0.000968479	Down	Klc1
NM_001081973.1	0.414957	-1.26897	0.0203037	Down	Klc1
NM_001081974.1	0.494724	-1.0153	0.0230384	Down	Klc1
NM_001081980.1	22.4099	4.48606	0.00480009	Up	Tbc1d10c
NM_001083337.1	5.81654	2.54016	0.00358678	Up	Pinx1
NM_001083811.1	0.48339	-1.04874	0.0255087	Down	Gria2
NM_001083898.1	0.45449	-1.13768	0.018386	Down	Ccdc92
NM_001085381.1	3.29733	1.7213	0.02368	Up	Gjc1
NM_001098216.1	4.29171	2.10155	0.00656841	Up	Tead3
NM_001098724.1	0.292623	-1.77288	0.000298261	Down	Necab3
NM_001100123.1	Inf	Inf	2.58e-06	Up	Lilrc2
NM_001100172.1	0.341075	-1.55184	0.00343947	Down	Kctd8
NM_001100470.1	2.06616	1.04696	0.0135367	Up	Nup153
NM_001100473.1	0.235591	-2.08564	6.11e-05	Down	Wnt7a
NM_001100480.1	0	#NAME?	0.0124065	Down	Tradd
NM_001100501.1	3.40608	1.76811	0.00139636	Up	Usp16
NM_001100511.1	2.52545	1.33654	0.00579627	Up	Riok1
NM_001100524.1	0.279445	-1.83936	0.0427644	Down	Pcdh18
NM_001100533.1	0.452066	-1.1454	0.0247998	Down	Nacc2
NM_001100536.1	2.36044	1.23906	0.0354909	Up	Magoh
NM_001100538.1	4.06215	2.02224	0.000110179	Up	Pabpc4
NM_001100541.1	0.433577	-1.20564	0.0123588	Down	Nova1
NM_001100547.1	2.01323	1.00951	0.0229943	Up	Dusp7
NM_001100557.1	0.395119	-1.33964	0.00416263	Down	Olig2
NM_001100575.1	0.39413	-1.34326	0.0344888	Down	Mpp7
NM_001100637.1	0.291572	-1.77807	0.0471695	Down	Trim23
NM_001100640.1	17.1574	4.10076	2.04e-07	Up	Lamc2
NM_001100653.1	0.10023	-3.31861	0.0385182	Down	Sidt1
NM_001100659.1	2.26743	1.18106	0.0188585	Up	Cdc23
NM_001100674.1	9.35505	3.22575	0.00756078	Up	Map2k3
NM_001100704.1	0.357335	-1.48465	0.0029787	Down	Extl2
NM_001100722.1	0.43891	-1.188	0.0473993	Down	Lingo1
NM_001100730.1	0.464588	-1.10598	0.0201489	Down	Nipsnap1
NM_001100736.1	2.15432	1.10723	0.0206278	Up	Abhd17c
NM_001100749.1	6.29929	2.65519	0.00372176	Up	Mxd1
NM_001100756.1	3.45497	1.78867	0.0415917	Up	Ttc7a
NM_001100762.1	3.95457	1.98352	0.017195	Up	Havcr2
NM_001100771.1	3.34735	1.74302	0.011206	Up	Esf1
NM_001100784.1	0.402924	-1.31142	0.0102026	Down	Gjc2
NM_001100810.1	2.55341	1.35242	0.0217377	Up	Rnpc3
NM_001100821.1	0.410035	-1.28618	0.0342382	Down	Ccne1
NM_001100822.2	0.389928	-1.35872	0.00668392	Down	Flt3
NM_001100836.1	5.17612	2.37187	0.01853	Up	Fcgr1a
NM_001100862.1	0.305621	-1.71018	0.0317933	Down	Fam13a
NM_001100863.1	0.459511	-1.12183	0.0176451	Down	Galnt16
NM_001100889.1	57.6455	5.84914	0.000543499	Up	Shroom3
NM_001100895.1	2.599	1.37796	0.00347491	Up	Atf1
NM_001100922.1	0.478921	-1.06214	0.0182228	Down	Prkaca
NM_001100988.1	19.9709	4.31983	9.89e-05	Up	Spidr
NM_001101681.2	0.484657	-1.04496	0.0250539	Down	Ampd2
NM_001102383.2	0.413769	-1.2731	0.00852824	Down	Pds5b
NM_001102408.1	3.32086	1.73156	0.00190214	Up	Uck2
NM_001103351.2	6.69111	2.74225	0.00587417	Up	Parp9
NM_001103354.2	0.29748	-1.74914	0.00020106	Down	LOC100125362
NM_001104528.1	0.456209	-1.13223	0.0233018	Down	Ephb1
NM_001105211.1	0.455286	-1.13515	0.0156389	Down	Mrvi1
NM_001105668.1	2.80892	1.49002	0.00156684	Up	Mdfic
NM_001105710.2	2.36667	1.24286	0.00962516	Up	Cad
NM_001105712.1	0.453917	-1.1395	0.0154156	Down	Grm3
NM_001105719.1	2.58573	1.37057	0.0358564	Up	Mip
NM_001105720.2	2.96409	1.56759	0.000308201	Up	Nfkbia
NM_001105729.3	0.352465	-1.50445	0.0187917	Down	Dpf1
NM_001105732.2	0.464192	-1.10721	0.0240927	Down	Sec23a
NM_001105733.1	0.456717	-1.13063	0.0258268	Down	Cacnb4
NM_001105735.2	2.89689	1.5345	0.000417978	Up	Litaf
NM_001105736.2	3.26535	1.70724	0.0109131	Up	Chic2
NM_001105748.1	0.415055	-1.26862	0.0372228	Down	Kcnd1
NM_001105754.2	0.453433	-1.14104	0.0194352	Down	Sez6
NM_001105763.1	2.07379	1.05227	0.0478738	Up	Zfp263
NM_001105770.1	4.05157	2.01848	0.00178334	Up	Zfp598
NM_001105774.1	0.459395	-1.12219	0.0489178	Down	Rpusd1
NM_001105777.2	2.6207	1.38995	0.00187287	Up	Rars
NM_001105793.1	3.29301	1.71941	0.0197548	Up	Aloxe3
NM_001105796.2	21.5853	4.43198	0.0195609	Up	Acap1
NM_001105800.1	22.5933	4.49782	0.0285623	Up	Zmynd15
NM_001105801.2	0.469073	-1.09212	0.0212979	Down	Camta2
NM_001105809.2	2.05188	1.03695	0.0398944	Up	Dph1
NM_001105811.1	0.173437	-2.52751	0.0235108	Down	Rilp
NM_001105817.1	0.409549	-1.28789	0.0111839	Down	Sarm1
NM_001105819.1	0.317992	-1.65294	0.000861933	Down	Rhbdl3
NM_001105822.1	130.593	7.02894	2.34e-15	Up	Ccl12
NM_001105837.1	2.80916	1.49014	0.00151546	Up	Eif1
NM_001105841.1	3.48533	1.80129	0.0225051	Up	Ptrf
NM_001105848.2	584.76	9.1917	2.37e-05	Up	Helz
NM_001105871.1	0.361332	-1.4686	0.0258063	Down	Hrasls
NM_001105873.1	3.84106	1.9415	0.0106025	Up	Tm4sf19
NM_001105874.2	0.350882	-1.51094	0.00465343	Down	Mylk
NM_001105875.1	2.23246	1.15864	0.02476	Up	Ccdc58
NM_001105879.1	3.36316	1.74982	0.00101559	Up	Arhgap31
NM_001105917.1	0.40886	-1.29032	0.0141189	Down	Actl6b
NM_001105919.1	0.432923	-1.20782	0.0367169	Down	Fis1
NM_001105924.1	6.23425	2.64022	0.0462275	Up	Zbed5
NM_001105926.2	2.58392	1.36956	0.00660603	Up	Dhx37
NM_001105928.1	3.393	1.76256	0.000136159	Up	Vps37b
NM_001105937.2	0.495124	-1.01414	0.0384328	Down	Sgsm1
NM_001105947.1	4.95411	2.30862	0.0194523	Up	Wdr83os
NM_001105953.2	0.460009	-1.12027	0.0183007	Down	Tmem9
NM_001105960.1	2.35903	1.23819	0.0081934	Up	Swt1
NM_001105962.3	16.2105	4.01886	0.0477417	Up	Prg4
NM_001105966.1	3.23168	1.69229	0.0255808	Up	Creg1
NM_001105971.1	5.44626	2.44526	0.0158959	Up	Slamf9
NM_001105973.1	Inf	Inf	0.000284909	Up	Slamf8
NM_001105974.1	0.473902	-1.07734	0.0342783	Down	Grem2
NM_001105980.1	2.09497	1.06693	0.0376542	Up	Nvl
NM_001105982.1	0.461367	-1.11601	0.0339568	Down	Susd4
NM_001106013.1	8.96032	3.16355	0.00263996	Up	Nop14
NM_001106015.1	0.34086	-1.55275	0.00633993	Down	Pla2g3
NM_001106026.2	0.491634	-1.02434	0.0446225	Down	RGD1306063
NM_001106040.1	3.15606	1.65813	0.000797471	Up	Nop9
NM_001106043.1	0.428198	-1.22365	0.0344919	Down	Dleu7
NM_001106045.1	9.53128	3.25267	1.68e-08	Up	Sox7
NM_001106047.2	4.53422	2.18085	0.0430867	Up	Loxl2
NM_001106052.1	35.3927	5.14538	0.00086285	Up	Olfm4
NM_001106054.1	Inf	Inf	0.0423752	Up	Klhl1
NM_001106057.1	0.246257	-2.02176	0.000163236	Down	Slitrk6
NM_001106074.1	2.68728	1.42615	0.00269179	Up	Crlf1
NM_001106075.1	3.19297	1.6749	0.0475553	Up	Klhl26
NM_001106090.1	5.48711	2.45605	0.0178315	Up	Whsc1l1
NM_001106094.2	0.157863	-2.66326	0.0387579	Down	Tmem255b
NM_001106095.1	3.11961	1.64136	0.00948352	Up	Lig4
NM_001106100.1	0.458657	-1.12451	0.0114341	Down	Agtpbp1
NM_001106106.1	2.23109	1.15775	0.00949727	Up	Eef1e1
NM_001106109.2	0.476652	-1.06899	0.0328421	Down	Nrsn1
NM_001106123.2	2.16465	1.11413	0.0323155	Up	Mrc1
NM_001106150.1	3.01151	1.59049	0.000663408	Up	Spry4
NM_001106172.1	12.1339	3.60097	0.00151851	Up	Nod2
NM_001106186.1	2.08186	1.05787	0.031814	Up	Cmtr2
NM_001106187.2	2.46949	1.30421	0.00949667	Up	Sf3b3
NM_001106204.1	2.9745	1.57265	0.00107318	Up	Rnf217
NM_001106207.1	10.8009	3.43309	0.0169138	Up	Myct1
NM_001106214.1	0.471037	-1.08609	0.0344265	Down	Lix1
NM_001106228.1	2.62897	1.3945	0.00313051	Up	Ercc1
NM_001106251.1	2.18166	1.12543	0.0266	Up	Ctu1
NM_001106263.2	0.130174	-2.94148	0.0221711	Down	Htatip2
NM_001106268.1	5.77452	2.5297	0.00312523	Up	Chsy1
NM_001106271.2	2.45297	1.29453	0.0207739	Up	Akap13
NM_001106276.1	0.0770842	-3.69742	0.0343844	Down	Cpeb1
NM_001106278.2	2.30701	1.20602	0.0134715	Up	Eed
NM_001106296.2	0.4074	-1.29548	0.0081435	Down	Fam57b
NM_001106314.1	11.3253	3.50148	0.0331724	Up	Ifitm1
NM_001106319.1	2.19109	1.13165	0.0133695	Up	Cars
NM_001106331.1	0.372789	-1.42357	0.0163546	Down	Trpt1
NM_001106340.1	2.99255	1.58137	0.0018165	Up	Mphosph10
NM_001106353.1	2.36832	1.24386	0.0082358	Up	Erlin1
NM_001106363.1	5.36965	2.42483	2.56e-05	Up	Pprc1
NM_001106367.3	0.469163	-1.09184	0.0301747	Down	Sorcs3
NM_001106373.3	0.431617	-1.21218	0.0146247	Down	Pank1
NM_001106387.1	0.447097	-1.16134	0.0217619	Down	Lrrtm3
NM_001106391.2	2.71257	1.43966	0.00181489	Up	Rpf2
NM_001106402.1	2.13218	1.09233	0.00984176	Up	Lhfpl2
NM_001106414.1	0.482808	-1.05048	0.0291044	Down	Ttc33
NM_001106425.1	5.49679	2.45859	0.000101118	Up	Armc1
NM_001106427.1	3.63358	1.86139	0.000420403	Up	Spry1
NM_001106430.1	3.64129	1.86445	0.015651	Up	Mgst2
NM_001106434.1	12.3807	3.63002	0.00318712	Up	Tm4sf1
NM_001106453.1	0.367098	-1.44576	0.0242246	Down	Trim45
NM_001106456.1	259.943	8.02205	7.29e-08	Up	Mab21l3
NM_001106461.1	4.88811	2.28928	4.2e-06	Up	Rhoc
NM_001106470.1	0.36225	-1.46494	0.0390106	Down	Mettl14
NM_001106480.1	2.55965	1.35595	0.00679991	Up	Prpf40a
NM_001106494.1	0.367345	-1.44479	0.00300243	Down	Lpcat4
NM_001106496.1	Inf	Inf	0.0126097	Up	Emc7
NM_001106515.1	Inf	Inf	0.0021214	Up	Fermt1
NM_001106521.2	3.71539	1.89351	0.0231333	Up	Nxt1
NM_001106525.3	0.431237	-1.21345	0.0120035	Down	Snph
NM_001106527.2	0.445976	-1.16496	0.0266128	Down	Tspy26
NM_001106539.1	0.353579	-1.49989	0.0139002	Down	Matn4
NM_001106582.1	0.469841	-1.08976	0.0389489	Down	Gpr165
NM_001106598.1	0.419127	-1.25454	0.00740366	Down	Ctnna2
NM_001106605.1	2.39015	1.2571	0.00996785	Up	Fam136a
NM_001106607.1	0.417963	-1.25855	0.00676966	Down	Podxl2
NM_001106616.1	2.48053	1.31065	0.0195897	Up	Csgalnact2
NM_001106619.1	0.446818	-1.16224	0.0100815	Down	Usp5
NM_001106629.1	35.7424	5.15956	1.33e-07	Up	Steap1
NM_001106631.1	2.46155	1.29957	0.0154889	Up	Rbpj
NM_001106637.1	4.23443	2.08217	8.14e-06	Up	Gem
NM_001106645.1	2.14794	1.10295	0.0242901	Up	Ddx58
NM_001106657.1	0.404639	-1.30529	0.0335247	Down	Zbtb5
NM_001106685.1	21.6396	4.4356	0.00260387	Up	Csf3r
NM_001106689.1	2.53873	1.3441	0.00518516	Up	Zfp593
NM_001106690.1	0	#NAME?	0.021981	Down	Grhl3
NM_001106697.1	3.79468	1.92398	0.00757027	Up	Mrto4
NM_001106698.1	4.31045	2.10784	0.0104028	Up	H6pd
NM_001106700.1	7.77281	2.95844	9.84e-06	Up	Isg15
NM_001106722.1	0.453194	-1.1418	0.0200859	Down	Gpr22
NM_001106739.1	0.243152	-2.04007	0.010095	Down	Six4
NM_001106748.1	14.1537	3.82311	0.0392964	Up	Batf
NM_001106762.1	3.15321	1.65682	0.00542605	Up	Syne3
NM_001106769.2	0.397304	-1.33168	0.0109162	Down	Apc2
NM_001106784.1	0.274246	-1.86646	0.0155426	Down	Lgr5
NM_001106791.2	2.34527	1.22975	0.033968	Up	Irak4
NM_001106810.1	2.62494	1.39228	0.0379696	Up	Adamts15
NM_001106816.1	0.327788	-1.60916	0.00466021	Down	Abcg4
NM_001106819.1	0.0869135	-3.52428	1.53e-05	Down	Nnmt
NM_001106820.1	2.07048	1.04997	0.022104	Up	Ddx10
NM_001106824.2	8.0576	3.01035	0.00415273	Up	Pstpip1
NM_001106835.1	3.82656	1.93605	0.00340929	Up	Bnip2
NM_001106845.1	0.163433	-2.61323	0.0222961	Down	Ankrd34c
NM_001106847.2	3.18862	1.67293	0.0196796	Up	Tfdp2
NM_001106857.1	0.440301	-1.18344	0.0202669	Down	Nckipsd
NM_001106858.1	13.3014	3.73351	0.00377889	Up	Col7a1
NM_001106872.1	Inf	Inf	0.0238387	Up	Ccr1l1
NM_001106876.1	3.23449	1.69354	0.000895661	Up	Mllt1
NM_001106885.1	Inf	Inf	0.0166761	Up	Trem1
NM_001106892.1	0.305767	-1.7095	0.000114566	Down	Enpp4
NM_001106898.1	0.414244	-1.27145	0.010236	Down	Adgrb3
NM_001106902.1	4.68017	2.22656	0.0136208	Up	Sema4c
NM_001106903.1	12.5091	3.64491	0.0310289	Up	Mrpl30
NM_001106904.1	3.40963	1.76962	0.000312802	Up	Map4k4
NM_001106913.2	2.43552	1.28423	0.00397514	Up	Clk1
NM_001106917.1	23.0533	4.5269	9.45e-17	Up	Pi15
NM_001106918.1	0.38726	-1.36863	0.0237691	Down	Fsd1
NM_001106919.1	2.0173	1.01242	0.0248743	Up	Arpc2
NM_001106930.1	0.351511	-1.50836	0.0300064	Down	Efcab1
NM_001106940.1	0.290137	-1.78519	0.0028978	Down	Lpar4
NM_001106943.1	2.95931	1.56526	0.0274445	Up	Foxo4
NM_001106947.1	0.353825	-1.49889	0.0021539	Down	Slitrk4
NM_001106974.2	0.418219	-1.25767	0.0068477	Down	Rbfox1
NM_001106989.1	0.398781	-1.32633	0.00458218	Down	Sox8
NM_001106995.1	0.442709	-1.17557	0.0245424	Down	Nipal4
NM_001106997.1	2.223	1.15251	0.0437273	Up	Maml1
NM_001107025.1	0.439045	-1.18756	0.0373341	Down	Abhd15
NM_001107027.1	5.99941	2.58482	0.0463808	Up	Psmd11
NM_001107031.1	9.77711	3.28941	2.44e-11	Up	Slfn2
NM_001107032.1	0.494009	-1.01739	0.0391365	Down	Usp32
NM_001107039.1	56.8564	5.82925	0.0312701	Up	Sgca
NM_001107043.1	15.5972	3.96321	0.0423214	Up	Tbx21
NM_001107046.1	0.400634	-1.31964	0.0212937	Down	Plxdc1
NM_001107053.1	43.1323	5.4307	0.00911688	Up	Nags
NM_001107064.1	0.387993	-1.3659	0.00751224	Down	Fads6
NM_001107067.2	9.79513	3.29206	0.000154121	Up	Rhbdf2
NM_001107069.1	3.00086	1.58538	0.00171731	Up	Usp36
NM_001107070.1	0.252435	-1.98602	0.0001342	Down	Engase
NM_001107090.2	2.47201	1.30569	0.0268845	Up	Osbpl11
NM_001107094.1	0.405299	-1.30294	0.0124945	Down	Hoxd10
NM_001107095.1	13.7023	3.77635	4.74e-11	Up	Nfkbiz
NM_001107107.1	2.88497	1.52856	0.000495052	Up	Ets2
NM_001107109.1	5.54824	2.47203	0.0443565	Up	Morc3
NM_001107110.1	9.90496	3.30815	1.65e-05	Up	Cbr3
NM_001107121.1	0.429556	-1.21908	0.0214222	Down	Zfp316
NM_001107144.1	0.444865	-1.16856	0.0132962	Down	Rnft2
NM_001107159.1	10.2194	3.35324	0.00635412	Up	Mmp19
NM_001107163.1	13.9038	3.79741	0.000581092	Up	Zswim4
NM_001107179.1	0.171716	-2.54191	0.000363497	Down	Lmod1
NM_001107190.1	16.8886	4.07798	0.0213349	Up	Rabgap1l
NM_001107192.1	5.38807	2.42977	0.0211728	Up	Klhl20
NM_001107196.1	2.7449	1.45675	0.00368968	Up	Atf6
NM_001107208.2	2.12311	1.08618	0.016013	Up	2018-09-11
NM_001107219.2	0.394471	-1.34201	0.00453888	Down	Lgi2
NM_001107227.1	0.270701	-1.88523	0.000417044	Down	Zfyve28
NM_001107248.1	2.11115	1.07803	0.0195012	Up	Vcl
NM_001107252.2	0.390467	-1.35673	0.00464144	Down	Nkiras1
NM_001107256.2	2.14758	1.10271	0.0248288	Up	Socs4
NM_001107262.1	0.341646	-1.54943	0.0265093	Down	Sall2
NM_001107264.1	4.23989	2.08403	0.0421898	Up	Nfatc4
NM_001107266.1	0.324072	-1.62561	0.00869897	Down	Ift88
NM_001107275.1	15.1117	3.9176	0.0491332	Up	Slc39a14
NM_001107277.1	0.421241	-1.24728	0.0059056	Down	Lgi3
NM_001107280.1	0.46332	-1.10992	0.0433614	Down	Pcdh20
NM_001107283.1	0.374739	-1.41604	0.00305179	Down	Slitrk1
NM_001107285.2	0.487268	-1.03721	0.0399693	Down	Gpc5
NM_001107288.1	5.4991	2.4592	0.00087635	Up	Flnb
NM_001107293.1	2.92615	1.549	0.000501024	Up	Eaf1
NM_001107301.1	0.445109	-1.16777	0.0112765	Down	Abhd8
NM_001107303.1	0.398618	-1.32692	0.00581629	Down	Arrdc2
NM_001107304.2	4.08372	2.02988	0.00032489	Up	Ell
NM_001107312.1	0.418394	-1.25707	0.0482424	Down	Mtmr7
NM_001107315.1	4.13525	2.04797	0.000100232	Up	Pragmin
NM_001107323.1	0.0714627	-3.80667	0.00192248	Down	Tubgcp3
NM_001107329.1	2.44759	1.29136	0.0101975	Up	Champ1
NM_001107350.1	4.32205	2.11172	0.00129549	Up	Ripk1
NM_001107365.1	0.411605	-1.28067	0.0057546	Down	Camk1d
NM_001107393.2	3.99796	1.99926	0.0199364	Up	Diaph1
NM_001107395.1	0.376576	-1.40899	0.00233945	Down	Psd2
NM_001107397.2	0.0932609	-3.42258	0.0147665	Down	Epb41l4a
NM_001107401.1	0.215341	-2.21531	0.00165111	Down	Nol4
NM_001107404.1	0.498548	-1.0042	0.0407709	Down	Cables1
NM_001107407.1	4.71847	2.23832	2.05e-05	Up	Cdh5
NM_001107415.2	0.487631	-1.03614	0.0409355	Down	Sall1
NM_001107430.1	41.6862	5.3815	0.0245616	Up	Pdpr
NM_001107431.1	0.192937	-2.3738	0.041389	Down	Chst5
NM_001107432.1	0.438028	-1.19091	0.0141917	Down	Cntnap4
NM_001107437.1	0.447582	-1.15978	0.011841	Down	Jph3
NM_001107444.1	48.5223	5.60058	0.0209476	Up	Nhlrc2
NM_001107451.1	0.351117	-1.50998	0.0148912	Down	Slc2a12
NM_001107453.1	3.2693	1.70898	0.0486828	Up	Brd9
NM_001107454.1	3.00876	1.58917	0.00197508	Up	Nkd2
NM_001107465.1	2.99862	1.5843	0.00542353	Up	Chd1
NM_001107481.1	0.485218	-1.04329	0.0241866	Down	Pnmal2
NM_001107496.1	0.259322	-1.94718	0.00338473	Down	Dyrk1b
NM_001107515.1	0.378269	-1.40251	0.00393447	Down	Hebp2
NM_001107519.1	0.438103	-1.19066	0.0192204	Down	Nipa1
NM_001107520.1	0.263528	-1.92397	0.00546417	Down	Herc2
NM_001107522.1	0.294561	-1.76336	0.00243828	Down	Slc35d3
NM_001107523.1	2.40127	1.2638	0.0290519	Up	Chd2
NM_001107524.1	0.421521	-1.24632	0.0135621	Down	Rgma
NM_001107544.2	0.48867	-1.03307	0.0266336	Down	Dchs1
NM_001107550.2	0.413257	-1.27489	0.00698692	Down	Sez6l2
NM_001107587.1	0.284639	-1.81279	0.0118707	Down	Slitrk2
NM_001107588.1	2.10266	1.07221	0.0179408	Up	Chuk
NM_001107591.1	2.26363	1.17864	0.0064828	Up	Sfrp5
NM_001107592.1	Inf	Inf	5.99e-14	Up	Loxl4
NM_001107593.1	0.420188	-1.25089	0.0262443	Down	Cnnm1
NM_001107604.2	2.8873	1.52972	0.0045034	Up	Pdcd11
NM_001107608.3	2.22144	1.1515	0.00726378	Up	Hectd2
NM_001107624.1	2.82836	1.49997	0.00173808	Up	Arid5b
NM_001107626.3	2.26283	1.17813	0.0412482	Up	Ado
NM_001107639.2	37.5537	5.23088	1.38e-07	Up	Prdm1
NM_001107647.2	2.23347	1.15929	0.0429332	Up	Utp15
NM_001107652.1	3.85703	1.94749	0.000566888	Up	Snx18
NM_001107671.1	0.437528	-1.19255	0.0200449	Down	Plcxd3
NM_001107680.1	Inf	Inf	0.0400872	Up	Mlf1
NM_001107683.1	0.233292	-2.09979	0.00126534	Down	Slitrk3
NM_001107693.1	0.30827	-1.69774	0.0331648	Down	Pogz
NM_001107697.1	2.4368	1.28499	0.00265668	Up	Otud7b
NM_001107705.1	3.03089	1.59974	0.00551734	Up	Wdr3
NM_001107711.1	8.8269	3.14191	0.000414168	Up	Mov10
NM_001107712.2	4.29054	2.10116	2.36e-06	Up	Cttnbp2nl
NM_001107744.1	2.10421	1.07328	0.0206929	Up	Nup160
NM_001107753.1	0.297808	-1.74754	0.000618851	Down	Lrrc4c
NM_001107756.1	2.14465	1.10074	0.0298874	Up	Nat10
NM_001107759.2	0.41249	-1.27757	0.00496539	Down	Disp2
NM_001107760.1	5.89256	2.55889	2.21e-06	Up	Dll4
NM_001107762.1	45.4832	5.50726	0.00622007	Up	Nusap1
NM_001107778.1	2.24155	1.16449	0.0418794	Up	Hspa12b
NM_001107779.1	2.56211	1.35733	0.00422654	Up	Trmt6
NM_001107782.1	0.443083	-1.17435	0.0175023	Down	Btbd3
NM_001107795.1	2.12821	1.08964	0.0208905	Up	Phf20
NM_001107796.1	0.262767	-1.92814	0.000943924	Down	Fam83d
NM_001107808.1	57.7523	5.85181	0.0423724	Up	Zbtb46
NM_001107821.2	26.6109	4.73395	0.00159585	Up	Agpat2
NM_001107833.1	0.428904	-1.22127	0.0103812	Down	Lrsam1
NM_001107834.1	0.431233	-1.21346	0.0254123	Down	Pbx3
NM_001107843.1	0.489794	-1.02975	0.0325793	Down	Lrp1b
NM_001107845.1	9.87849	3.30429	0.00361209	Up	Gsap
NM_001107859.1	0.162205	-2.62411	0.0337408	Down	Zfp775
NM_001107863.1	0.469175	-1.0918	0.0305297	Down	Ppm1k
NM_001107868.1	2.18404	1.127	0.0238851	Up	Zfp638
NM_001107869.1	0.0988188	-3.33907	0.0404885	Down	Dysf
NM_001107871.1	0.448814	-1.15581	0.0241799	Down	Fbxo41
NM_001107877.1	22.6996	4.50459	2.35e-14	Up	Adamts9
NM_001107883.2	4.19127	2.06739	0.00341019	Up	Il17ra
NM_001107890.1	0.447814	-1.15903	0.0225646	Down	Tspan9
NM_001107896.1	2.46764	1.30313	0.025476	Up	Ppfibp1
NM_001107897.1	0.392618	-1.3488	0.00354189	Down	Gdap1
NM_001107902.1	6.81918	2.7696	0.0107551	Up	Sox17
NM_001107907.2	5.81392	2.53951	0.0102108	Up	Fam46b
NM_001107909.1	19.3927	4.27744	0.00546449	Up	Map3k6
NM_001107922.2	0.444468	-1.16985	0.0249828	Down	Pm20d2
NM_001107938.1	4.22099	2.07758	3.53e-05	Up	Polr1e
NM_001107941.1	0.445678	-1.16593	0.0184693	Down	Dcaf12
NM_001107949.4	0.400785	-1.3191	0.00454988	Down	Dnajc6
NM_001107959.1	0.466907	-1.09879	0.0220762	Down	Atpaf1
NM_001107964.1	0.262346	-1.93046	0.0186084	Down	Tmem53
NM_001107972.1	Inf	Inf	0.000415856	Up	Hivep3
NM_001107973.1	3.78538	1.92044	0.00297971	Up	Exo5
NM_001107979.1	6.01689	2.58902	0.00129339	Up	Fhl3
NM_001107981.1	0.468254	-1.09464	0.0337333	Down	RGD1563072
NM_001107985.1	0.405891	-1.30084	0.00716343	Down	Extl1
NM_001107986.2	4.84732	2.27719	0.00158428	Up	Srrm1
NM_001107988.1	0.193492	-2.36965	0.00695236	Down	Vwa5b1
NM_001107993.1	2.28412	1.19164	0.0163035	Up	Ubiad1
NM_001107994.2	Inf	Inf	0.0482073	Up	Spsb1
NM_001107996.1	5.55093	2.47273	0.00844748	Up	Klhl21
NM_001108005.1	3.392	1.76214	0.0114193	Up	Mast2
NM_001108024.1	0.407739	-1.29428	0.0110492	Down	Lrfn5
NM_001108040.1	2.33294	1.22215	0.0137345	Up	RGD1307704
NM_001108068.1	7.42905	2.89318	0.00579246	Up	Sbno2
NM_001108094.2	2.31283	1.20966	0.0114719	Up	Krr1
NM_001108099.1	5.50737	2.46136	1.23e-06	Up	Mdm2
NM_001108105.1	0.424586	-1.23587	0.0317438	Down	Mlc1
NM_001108107.2	0.362249	-1.46495	0.0227601	Down	Pdzrn4
NM_001108108.1	Inf	Inf	0.0212196	Up	Ano6
NM_001108118.1	32.8091	5.03602	2.34e-07	Up	Itga5
NM_001108134.2	2.76809	1.46889	0.00521166	Up	Pus3
NM_001108143.2	2.59589	1.37623	0.00291033	Up	Rbm7
NM_001108146.1	3.00871	1.58914	0.00227588	Up	Zc3h12c
NM_001108152.1	2.07934	1.05612	0.02633	Up	Imp3
NM_001108183.1	8.22099	3.03931	0.00446317	Up	Manf
NM_001108195.1	26.9543	4.75245	5.29e-05	Up	Klhl40
NM_001108215.1	0.370194	-1.43365	0.019986	Down	Mfsd9
NM_001108223.1	0.354214	-1.49731	0.00240832	Down	Shd
NM_001108226.1	0.34282	-1.54448	0.0489214	Down	Wnt6
NM_001108234.1	0.313888	-1.67168	0.00188881	Down	Neu4
NM_001108237.2	0.376665	-1.40865	0.00805861	Down	Lama1
NM_001108244.1	0.426801	-1.22836	0.0408581	Down	Klhl4
NM_001108248.1	4.50982	2.17307	0.0484285	Up	Was
NM_001108262.1	2.14647	1.10197	0.0375462	Up	Zc3h7a
NM_001108285.1	3.60696	1.85078	0.0165641	Up	Nxn
NM_001108295.1	3.4594	1.79052	0.00576981	Up	Cwc25
NM_001108301.1	2.77699	1.47352	0.0131799	Up	Map3k14
NM_001108303.2	Inf	Inf	0.00423807	Up	Sdk2
NM_001108311.1	2.26904	1.18208	0.0497883	Up	Mcrip1
NM_001108313.1	2.06073	1.04316	0.017252	Up	Ifngr2
NM_001108318.2	0.494309	-1.01652	0.0241129	Down	Atp6v1a
NM_001108338.3	0.479654	-1.05993	0.020393	Down	Fbxo21
NM_001108353.1	9.40722	3.23377	0.0459049	Up	Plac8
NM_001108354.2	0.213745	-2.22603	0.0256991	Down	Tmem150c
NM_001108355.1	4.78087	2.25727	0.00333605	Up	Cnot6l
NM_001108358.1	0.249718	-2.00163	0.00208319	Down	Lnx1
NM_001108359.1	0.446079	-1.16463	0.0108452	Down	Dcun1d4
NM_001108373.1	2.79703	1.4839	0.00127134	Up	Mapk1ip1l
NM_001108393.1	3.16562	1.66249	0.000501816	Up	Zmiz1
NM_001108398.1	0.333645	-1.58362	0.000565207	Down	Hapln4
NM_001108418.1	6.13554	2.61719	0.00299267	Up	Heatr1
NM_001108423.1	3.59079	1.8443	0.0130544	Up	Riok3
NM_001108424.1	16.821	4.0722	2.66e-05	Up	Rnf125
NM_001108465.1	0.478516	-1.06336	0.0248466	Down	Usp29
NM_001108475.2	3.28358	1.71527	0.00392085	Up	Vasp
NM_001108478.1	0.447382	-1.16042	0.0323443	Down	Ttc9b
NM_001108479.1	0.407813	-1.29402	0.0119499	Down	Vstm2b
NM_001108487.2	4.32733	2.11348	0.00210368	Up	Aen
NM_001108488.1	4.55916	2.18877	0.0351902	Up	Fes
NM_001108489.1	5.55676	2.47424	0.00831325	Up	Iqgap1
NM_001108514.1	0.460795	-1.1178	0.0299265	Down	Ankrd13d
NM_001108516.1	3.40789	1.76888	0.00606417	Up	Dpf2
NM_001108520.2	2.39854	1.26215	0.0107551	Up	Patl1
NM_001108523.1	2.11915	1.08348	0.017674	Up	Noc3l
NM_001108552.1	0.493847	-1.01786	0.0245433	Down	Trim2
NM_001108563.1	18.8204	4.23423	0.000113297	Up	Sypl2
NM_001108569.3	6.04552	2.59587	0.000683284	Up	Gbp5
NM_001108610.1	9.07626	3.1821	0.00263131	Up	Stx16
NM_001108617.1	0.41981	-1.25219	0.0168029	Down	Cdk14
NM_001108622.1	0	#NAME?	0.0157098	Down	Hipk2
NM_001108629.2	2.66867	1.41612	0.0241396	Up	Ggct
NM_001108631.1	0.364528	-1.4559	0.00143026	Down	Herc3
NM_001108632.1	4.05129	2.01838	0.0138863	Up	Rpia
NM_001108633.1	0.438457	-1.18949	0.00893062	Down	Reep1
NM_001108664.1	2.22993	1.157	0.0473976	Up	Msantd3
NM_001108692.1	0.238564	-2.06755	0.00377441	Down	Arhgef19
NM_001108697.1	0.394142	-1.34321	0.00854575	Down	Fam213b
NM_001108701.1	2.45092	1.29332	0.00337284	Up	Cebpz
NM_001108707.1	3.15377	1.65708	0.00127598	Up	Twistnb
NM_001108718.1	3.79457	1.92394	0.0011329	Up	Alkbh1
NM_001108721.2	0.493055	-1.02018	0.0490655	Down	Prima1
NM_001108727.1	0.368012	-1.44218	0.00726612	Down	Coq10a
NM_001108743.1	2.06473	1.04595	0.03737	Up	Elk3
NM_001108745.1	0.333389	-1.58472	0.011064	Down	Ppfia2
NM_001108748.1	0.481127	-1.05551	0.0264352	Down	Tubgcp6
NM_001108749.1	0.476166	-1.07046	0.0433359	Down	Dennd6b
NM_001108750.1	3.40551	1.76787	0.000353343	Up	Cpne8
NM_001108757.1	Inf	Inf	1.94e-06	Up	Pate4
NM_001108759.1	0.498321	-1.00485	0.04078	Down	Siae
NM_001108762.1	0.0131541	-6.24835	0.0178565	Down	Commd4
NM_001108764.1	29.1114	4.86351	3.07e-05	Up	Fam219b
NM_001108774.1	0.0149958	-6.05929	0.0258697	Down	Mrap2
NM_001108775.1	0.381234	-1.39125	0.0167213	Down	Rab6b
NM_001108778.1	6.21639	2.63608	0.000597596	Up	Rrp9
NM_001108786.1	12.7821	3.67605	2.26e-06	Up	Csrnp1
NM_001108790.1	0.471642	-1.08424	0.0316376	Down	Tmem14a
NM_001108792.2	0.405756	-1.30131	0.00709359	Down	Bend6
NM_001108795.1	0.411319	-1.28167	0.00673598	Down	Tmeff2
NM_001108808.1	2.09793	1.06896	0.0364603	Up	Eif4e2
NM_001108822.1	3.13217	1.64716	0.00219693	Up	RGD1305537
NM_001108824.1	0.474055	-1.07687	0.043082	Down	Fbll1
NM_001108829.1	8.69499	3.12019	4.05e-09	Up	Kdm6b
NM_001108831.2	4.25042	2.08761	0.0306004	Up	Kctd11
NM_001108838.1	0.35767	-1.4833	0.00716314	Down	C1ql1
NM_001108839.1	2.49953	1.32166	0.00948433	Up	Mettl2b
NM_001108844.1	0.456337	-1.13183	0.0462286	Down	Map6d1
NM_001108873.1	11.5815	3.53374	0.000312899	Up	Tnfrsf10b
NM_001108901.1	3.32332	1.73263	0.0408193	Up	Samd5
NM_001108902.1	4.78247	2.25775	1.21e-05	Up	Rab32
NM_001108933.1	3.32781	1.73457	0.00132773	Up	Dse
NM_001108941.1	0.498792	-1.00349	0.0278081	Down	Tbl1xr1
NM_001108950.2	16.7657	4.06744	0.00605693	Up	Gnat2
NM_001108951.1	0.474322	-1.07606	0.0347656	Down	LOC365985
NM_001108958.1	0.120625	-3.0514	0.049361	Down	Rtf1
NM_001108963.1	0.282292	-1.82474	0.023804	Down	Slc2a10
NM_001108965.1	76.1953	6.25163	0.0203017	Up	Rbm38
NM_001108966.1	Inf	Inf	0.00979927	Up	Rab22a
NM_001108969.1	0.385294	-1.37597	0.0130804	Down	Clvs1
NM_001108977.1	5.85519	2.54972	0.00237525	Up	Epha2
NM_001108987.1	0.385892	-1.37373	0.00637022	Down	Diras1
NM_001108991.1	0.405234	-1.30317	0.0199196	Down	Trhde
NM_001109016.1	5.21473	2.38259	0.0350599	Up	Bmx
NM_001109017.1	0.337777	-1.56586	0.00988499	Down	Zfx
NM_001109018.1	0.419904	-1.25187	0.00782933	Down	Rab9b
NM_001109022.1	36.1839	5.17728	7.54e-14	Up	Inmt
NM_001109053.1	11.044	3.46519	3.91e-06	Up	Dtx3l
NM_001109058.1	0.388284	-1.36482	0.0146415	Down	LOC498122
NM_001109060.1	3.47756	1.79808	0.0100596	Up	Stard13
NM_001109073.1	0.129726	-2.94647	0.0337628	Down	Ccdc190
NM_001109077.1	6.9097	2.78862	0.00925847	Up	Arhgap30
NM_001109078.1	16.802	4.07056	0.000436396	Up	Slamf1
NM_001109096.1	0.110624	-3.17626	0.00271144	Down	Gpr75
NM_001109117.1	0.0195392	-5.67748	0.00353407	Down	Rnf182
NM_001109118.1	0.461819	-1.1146	0.0205975	Down	Elovl2
NM_001109127.1	0.376755	-1.4083	0.00630017	Down	Cbln1
NM_001109133.1	3.22216	1.68803	0.00676194	Up	Spata2L
NM_001109150.2	0.456654	-1.13083	0.0260932	Down	Fam181b
NM_001109173.1	0.256604	-1.96238	0.0104277	Down	Gpr150
NM_001109174.1	0.341233	-1.55117	0.0220906	Down	Ankrd34b
NM_001109189.1	0.302695	-1.72406	0.00163535	Down	Lingo4
NM_001109195.1	0.419915	-1.25183	0.0095641	Down	Rnf208
NM_001109199.1	9.78586	3.2907	1.09e-05	Up	Ifih1
NM_001109203.1	14.4547	3.85347	0.0138903	Up	Prrg4
NM_001109223.1	0.139195	-2.84482	0.00465233	Down	Wnt16
NM_001109225.1	4.99702	2.32107	0.00414714	Up	Zfp800
NM_001109233.2	0.217052	-2.20389	0.0016396	Down	Hoxa7
NM_001109236.1	7.52429	2.91156	0.0137642	Up	Nod1
NM_001109237.1	0.27962	-1.83846	0.0152058	Down	Neurod6
NM_001109239.1	0.333178	-1.58564	0.0192519	Down	RGD1560028
NM_001109243.1	0.260035	-1.94322	0.0003736	Down	Eva1a
NM_001109255.2	0.489477	-1.03069	0.0248108	Down	Sspn
NM_001109260.1	0.409217	-1.28906	0.00648767	Down	RGD1561849
NM_001109270.1	2.70028	1.43311	0.0259414	Up	Fam110d
NM_001109274.1	2.65578	1.40914	0.00989494	Up	Socs5
NM_001109285.1	0.116906	-3.09658	0.00217796	Down	C2cd4c
NM_001109294.1	0.359577	-1.47563	0.0345663	Down	Tmem266
NM_001109320.1	0.456063	-1.1327	0.0393005	Down	Amer1
NM_001109364.1	4.44917	2.15353	0.000631945	Up	Sowahc
NM_001109377.1	8.75826	3.13064	0.0487131	Up	Clec5a
NM_001109382.1	2.82365	1.49756	0.0460301	Up	Vasn
NM_001109391.1	0.420995	-1.24812	0.0278318	Down	Mab21l2
NM_001109393.1	0.412842	-1.27634	0.00804216	Down	Timp4
NM_001109398.1	2.20368	1.13992	0.0246736	Up	Mthfd2
NM_001109411.1	5.93846	2.57009	0.0177756	Up	Plpp5
NM_001109416.1	11.9732	3.58173	0.000212749	Up	Cd3eap
NM_001109421.1	8.22346	3.03974	0.000749735	Up	Ebi3
NM_001109422.1	42.5846	5.41226	4.68e-17	Up	Bcl3
NM_001109434.1	2.91087	1.54145	0.0355563	Up	Qsox2
NM_001109435.1	0.192668	-2.37581	0.0350594	Down	Nxpe3
NM_001109439.1	49.7122	5.63553	3.63e-08	Up	LOC681325
NM_001109449.2	0.398252	-1.32825	0.0343293	Down	Glyctk
NM_001109454.1	0.39053	-1.35649	0.00613091	Down	Pgm2l1
NM_001109472.1	0.164304	-2.60556	0.00239501	Down	Clgn
NM_001109480.1	0.401717	-1.31575	0.00292806	Down	Tmem229a
NM_001109492.1	0.340404	-1.55468	0.00248279	Down	B3galt2
NM_001109509.1	2.69638	1.43102	0.0363746	Up	Gpr84
NM_001109514.1	3.97625	1.99141	0.00561192	Up	Pmp2
NM_001109531.1	181.224	7.50163	0.00320637	Up	Mis18bp1
NM_001109535.1	7.20971	2.84994	0.00963064	Up	Rab20
NM_001109536.1	238.111	7.89549	7.26e-14	Up	Ptx3
NM_001109541.1	7.97409	2.99532	6.84e-05	Up	Dnajb2
NM_001109584.1	3.2176	1.68598	0.00675465	Up	Vangl1
NM_001109585.1	5.23488	2.38816	6.22e-07	Up	Trim47
NM_001109598.1	3.01419	1.59177	0.000453446	Up	Smurf1
NM_001109602.1	3.42556	1.77634	0.0314045	Up	Alyref
NM_001109604.1	9.18057	3.19858	0.0415978	Up	Tmem86b
NM_001109608.1	2.24702	1.16801	0.0174662	Up	Asun
NM_001109624.1	31.1706	4.96211	0.00377126	Up	LOC691141
NM_001109630.1	0.496338	-1.01061	0.0287403	Down	Slc12a6
NM_001109647.1	2.55049	1.35077	0.0128918	Up	Spata5l1
NM_001109650.1	0.381651	-1.38967	0.0093876	Down	Kctd4
NM_001109651.1	3.59737	1.84694	0.00327264	Up	LOC691931
NM_001109678.1	12.3473	3.62613	0.00273798	Up	Nadk
NM_001109880.1	Inf	Inf	0.00243693	Up	Add2
NM_001109882.1	3.26521	1.70718	0.00826381	Up	Bsg
NM_001109885.1	13.0721	3.70842	0.000397721	Up	Fam129b
NM_001109887.1	7.17864	2.84371	0.000113469	Up	Ptprc
NM_001109889.1	7.98217	2.99678	0.0197744	Up	Ptprc
NM_001109890.1	8.90279	3.15426	0.0291686	Up	Ptprc
NM_001109892.1	0.433098	-1.20723	0.0114261	Down	Fgfr2
NM_001109896.1	0.340988	-1.55221	0.000638497	Down	Fgfr2
NM_001109900.1	0.36526	-1.453	0.0344953	Down	Akr1cl
NM_001109912.1	0.462002	-1.11403	0.0150334	Down	Tsc22d1
NM_001109968.1	6.24197	2.642	0.000824159	Up	Gls
NM_001110055.1	4.61756	2.20713	8.32e-07	Up	RGD1564664
NM_001110334.2	6.79537	2.76455	0.00376899	Up	Vegfa
NM_001110491.1	15.1141	3.91782	0.00127642	Up	Fbxo27
NM_001110763.2	0.473248	-1.07933	0.0308166	Down	Tmem163
NM_001110797.1	0.445754	-1.16568	0.0179097	Down	Pclo
NM_001111056.1	0.304058	-1.71758	0.0308403	Down	Adarb1
NM_001111057.1	0.456079	-1.13265	0.0138197	Down	Adarb1
NM_001111098.1	4.28097	2.09794	0.0123012	Up	Lyn
NM_001111269.1	5.52775	2.46669	9.5e-09	Up	LOC689064
NM_001111295.1	12.6749	3.6639	5.3e-05	Up	Hnrnpa3
NM_001111366.1	0.346702	-1.52823	0.0251406	Down	Afmid
NM_001112713.1	2.93314	1.55245	0.0105938	Up	Grk6
NM_001112737.2	4.19515	2.06872	0.0228096	Up	Limd1
NM_001112742.1	0.3887	-1.36327	0.00522982	Down	Gria3
NM_001113185.1	0.38824	-1.36498	0.00360602	Down	Gria4
NM_001113357.1	0.264131	-1.92068	0.0216233	Down	Npy1r
NM_001113422.1	0.440352	-1.18327	0.034274	Down	Nr1d1
NM_001113542.1	2.75111	1.46001	0.0180193	Up	Wtap
NM_001113754.1	0.415588	-1.26677	0.0131583	Down	Grhpr
NM_001115043.1	18.0322	4.1725	0.00183814	Up	LOC684871
NM_001122644.1	0.327413	-1.61081	0.000809984	Down	Galnt9
NM_001122776.1	0.495591	-1.01278	0.0420073	Down	Kcnc4
NM_001126085.1	0.373201	-1.42198	0.026155	Down	Lsm6
NM_001126091.1	2.06825	1.04841	0.0367151	Up	Snrpf
NM_001126093.2	0.450582	-1.15014	0.0178698	Down	Pcp4l1
NM_001126273.1	0.224249	-2.15682	0.00923936	Down	Alkbh2
NM_001126280.1	0.418067	-1.25819	0.00644082	Down	Tmem179
NM_001126301.1	12.1995	3.60875	0.0292657	Up	Tmc8
NM_001126374.1	0.472707	-1.08098	0.0342884	Down	Zc4h2
NM_001127299.1	0.345019	-1.53525	0.0265725	Down	Fam84a
NM_001127303.1	4.1786	2.06302	0.0352458	Up	Itpripl2
NM_001127304.1	13.8365	3.7904	0.000736118	Up	Ncf4
NM_001127337.1	0.471676	-1.08413	0.0214568	Down	Brsk1
NM_001127446.1	2.35937	1.2384	0.00787138	Up	Dlc1
NM_001127483.1	2.83403	1.50286	0.00974964	Up	Dis3
NM_001127529.2	21.9987	4.45935	0.0170207	Up	Glb1l
NM_001127534.1	3.21228	1.6836	0.00349859	Up	Nle1
NM_001127538.1	0.45645	-1.13147	0.0223926	Down	Spire2
NM_001127544.1	4.442	2.15121	0.0231848	Up	Slc25a24
NM_001127548.1	2.35803	1.23758	0.0300093	Up	Traf7
NM_001127570.1	2.73659	1.45238	0.007122	Up	Trip6
NM_001127594.1	0.0208043	-5.58697	0.000396687	Down	Zfp786
NM_001127602.1	0.366043	-1.44991	0.024089	Down	Slc25a53
NM_001127607.1	0.451837	-1.14613	0.0197774	Down	Ttc30b
NM_001127657.2	0.237719	-2.07267	0.0277399	Down	Spin2a
NM_001127659.1	3.06354	1.6152	0.00138189	Up	Mars
NM_001128155.1	5.43469	2.4422	2.68e-05	Up	Tmem88
NM_001128185.1	0.204968	-2.28653	0.00133901	Down	Myadml2
NM_001128193.2	0.399795	-1.32267	0.0196434	Down	Vps37d
NM_001129880.2	6.16537	2.62419	0.0203009	Up	Lbh
NM_001129882.1	4.01721	2.00619	0.000244943	Up	Pcgf5
NM_001129997.1	5.44538	2.44503	0.0114622	Up	Ehbp1l1
NM_001130508.1	0.388313	-1.36471	0.0482182	Down	Scx
NM_001130536.1	3.20388	1.67982	0.00915376	Up	Fzd6
NM_001130540.1	2.64646	1.40406	0.00227909	Up	Ext1
NM_001130546.1	0.400439	-1.32035	0.00370849	Down	Lynx1
NM_001130569.1	0.386694	-1.37073	0.00508427	Down	Mpped1
NM_001130570.1	0.407513	-1.29508	0.0105535	Down	Scrt1
NM_001130573.1	21.9191	4.45412	8.16e-13	Up	Maff
NM_001131001.1	4.314	2.10903	0.0144078	Up	Fcer1g
NM_001134410.1	0.113704	-3.13664	4.93e-07	Down	Tmem132e
NM_001134414.2	0.447126	-1.16125	0.0291533	Down	Tmtc4
NM_001134464.2	4.12268	2.04358	0.00644635	Up	Llph
NM_001134469.1	0.430496	-1.21593	0.0101243	Down	Lrrc49
NM_001134481.1	0.44561	-1.16615	0.0139298	Down	Plcxd2
NM_001134498.2	0.21408	-2.22378	5.12e-05	Down	Rbfox3
NM_001134507.1	5.57659	2.47938	0.0015382	Up	RGD1309350
NM_001134514.2	2.61367	1.38608	0.00398594	Up	Sestd1
NM_001134520.1	2.34438	1.22921	0.00809918	Up	Rad54l2
NM_001134555.1	2.78753	1.47899	0.00289048	Up	C1r
NM_001134556.1	2.17878	1.12352	0.0171751	Up	Snrnp40
NM_001134560.1	10.0371	3.32727	0.0107819	Up	Rd3l
NM_001134561.3	0.477433	-1.06663	0.0432662	Down	Zfp563
NM_001134577.1	2.56983	1.36167	0.0015438	Up	Slc39a1
NM_001134595.2	0	#NAME?	0.00532033	Down	Slc26a10
NM_001134602.1	102.141	6.67442	0.000350685	Up	Mcemp1
NM_001134615.1	0.405885	-1.30086	0.00651002	Down	Slc7a14
NM_001134619.1	0.371034	-1.43038	0.0111885	Down	Tti1
NM_001134632.1	0.367032	-1.44602	0.00408288	Down	Ppp4r4
NM_001134643.2	0.428754	-1.22178	0.0281489	Down	Kcnq5
NM_001134645.1	0	#NAME?	0.0162621	Down	Cntrob
NM_001134686.2	2.32642	1.21811	0.00849341	Up	Slc7a2
NM_001134700.1	0.0603967	-4.04939	0.0244912	Down	Fam19a4
NM_001134702.1	0.40884	-1.29039	0.0272751	Down	Meis1
NM_001134703.1	2.26659	1.18052	0.0383555	Up	Iffo2
NM_001134712.1	4.03172	2.0114	0.000576334	Up	Fam60a
NM_001134713.1	2.29144	1.19625	0.0322534	Up	Shq1
NM_001134729.1	0.420569	-1.24959	0.0319811	Down	Lyrm7
NM_001134731.1	2.74485	1.45673	0.0155801	Up	Ttc9
NM_001134750.1	0.411984	-1.27934	0.00635909	Down	Pnkd
NM_001134751.1	0.466674	-1.09951	0.0208718	Down	Pnkd
NM_001134756.1	2.10742	1.07548	0.0305577	Up	Gnpnat1
NM_001134800.3	2.11703	1.08204	0.024911	Up	Zbed4
NM_001134839.1	0.276256	-1.85592	0.000898102	Down	Ly6h
NM_001134845.1	0.393514	-1.34551	0.0124999	Down	LOC688613
NM_001134862.1	0.462851	-1.11138	0.0302602	Down	Pbx1
NM_001134873.1	2.8141	1.49267	0.0173268	Up	Ctps1
NM_001134874.1	2.08468	1.05982	0.0384471	Up	Nab2
NM_001134884.1	3.14924	1.655	0.00433179	Up	Scube1
NM_001134969.1	0.405331	-1.30283	0.0195218	Down	Ankrd6
NM_001134974.1	2.12168	1.08521	0.0157998	Up	Trim27
NM_001134992.1	5.2928	2.40403	0.00542254	Up	Sash3
NM_001134998.1	4.93672	2.30355	0.024401	Up	Zfp951
NM_001135009.1	6.08011	2.6041	0.00185392	Up	Col4a1
NM_001135013.1	0.404745	-1.30491	0.0480508	Down	Ankrd42
NM_001135016.1	0.39138	-1.35336	0.00854419	Down	Tmem86a
NM_001135017.1	3.47543	1.79719	0.00684257	Up	Myl12a
NM_001135603.1	0.283236	-1.81992	0.0169416	Down	Celf5
NM_001135708.1	3.0294	1.59903	0.000902522	Up	Urb2
NM_001135743.1	2.49283	1.31778	0.00653606	Up	Wbscr22
NM_001135799.1	0.467715	-1.0963	0.0440332	Down	Bmper
NM_001135801.1	2.04757	1.03391	0.022928	Up	Ddx27
NM_001135868.1	0.225895	-2.14627	0.00449751	Down	Slc45a3
NM_001135992.1	12.4137	3.63386	2.36e-06	Up	LOC498276
NM_001136124.1	5.28031	2.40062	0.000655549	Up	Ifitm3
NM_001136151.1	0.368103	-1.44182	0.0477104	Down	Nrg2
NM_001137564.1	7.37812	2.88325	4.21e-11	Up	Mt2A
NM_001137633.1	13.1256	3.71432	0.0225114	Up	Tnfaip2
NM_001137645.1	2.22227	1.15203	0.0442181	Up	Fgd6
NM_001137646.1	2.59499	1.37573	0.00254826	Up	Zfp259
NM_001139492.1	2.49437	1.31867	0.0325837	Up	Ppp2r3b
NM_001142366.2	0.460337	-1.11924	0.0121344	Down	Aqp4
NM_001142962.1	0.356397	-1.48844	0.027526	Down	Zfp458
NM_001144840.1	0.419328	-1.25385	0.0379238	Down	Camsap3
NM_001144861.1	11.3001	3.49826	0.0161792	Up	Plekha7
NM_001144870.1	0.319208	-1.64743	0.00804476	Down	Vstm5
NM_001145163.1	0.397516	-1.33092	0.00443544	Down	Ube2ql1
NM_001145456.1	2.02707	1.0194	0.0354487	Up	Lims1
NM_001145828.1	70.7821	6.14531	0.0465264	Up	Tlr5
NM_001145842.1	3.5527	1.82892	0.0183893	Up	Grn
NM_001146125.2	6.06675	2.60092	5.99e-06	Up	Fpgs
NM_001159656.1	0.315635	-1.66367	0.00164439	Down	Gnas
NM_001162408.1	30.2584	4.91926	0.045855	Up	Dusp13
NM_001162411.1	0.389454	-1.36048	0.003652	Down	Epha4
NM_001162935.1	0.172036	-2.53921	8.03e-05	Down	Ctxn2
NM_001163002.1	0.0808844	-3.62799	0.00452427	Down	Smim5
NM_001163277.1	0.405398	-1.30259	0.0142801	Down	Jakmip3
NM_001163723.1	0.215951	-2.21123	0.0370933	Down	Smim1
NM_001163736.1	4.01154	2.00416	0.00198096	Up	Myo19
NM_001164060.1	2.25088	1.17049	0.0114343	Up	Shc1
NM_001164103.1	0.28695	-1.80113	0.0146345	Down	Add3
NM_001164142.3	3.21816	1.68623	0.0220862	Up	Cnr2
NM_001164296.1	2.4509	1.29331	0.0148791	Up	Plec
NM_001164298.1	0.400739	-1.31927	0.0019629	Down	Plec
NM_001164307.1	9.66826	3.27326	0.00704849	Up	Plec
NM_001164308.1	7.69448	2.94382	0.000478245	Up	Plec
NM_001165880.1	9.24662	3.20893	0.00205342	Up	Egfl8
NM_001168284.1	14.5838	3.86629	0.0122585	Up	RGD1561778
NM_001168285.1	235.973	7.88248	2.01e-11	Up	RGD1559482
NM_001168631.1	0.242339	-2.0449	0.000134535	Down	Cdh10
NM_001168653.1	3.23952	1.69578	0.00386269	Up	Pwp2
NM_001169102.1	4.35661	2.12321	0.00327732	Up	Tma16
NM_001169103.1	4.54187	2.18329	0.00439405	Up	Crim1
NM_001169116.2	3.67666	1.87839	0.00222767	Up	Elmsan1
NM_001169133.2	0.270245	-1.88766	0.000162966	Down	Tenm3
NM_001169137.2	0.429198	-1.22028	0.0198797	Down	Epha5
NM_001169138.1	6.08607	2.60551	3.11e-09	Up	Thbs2
NM_001169142.1	Inf	Inf	0.000288218	Up	Nlrp12
NM_001170336.1	0.104248	-3.26191	0.00597352	Down	Ltbp4
NM_001170398.1	0.434194	-1.20359	0.00733852	Down	Fry
NM_001170434.1	9.3516	3.22521	0.00196482	Up	Lrrc32
NM_001170439.1	0.307816	-1.69986	0.00293706	Down	Evc
NM_001170456.1	0.480043	-1.05876	0.0256148	Down	Fam69a
NM_001170531.1	0.445939	-1.16508	0.0111175	Down	Rasgrf1
NM_001170541.1	6.46509	2.69267	0.00567684	Up	Natd1
NM_001170542.1	0.421662	-1.24584	0.00687133	Down	Csdc2
NM_001170559.1	4.3801	2.13096	0.0225695	Up	Vcan
NM_001170568.1	7.7418	2.95267	9.51e-05	Up	Baz1a
NM_001170589.1	4.35155	2.12153	0.00144753	Up	Pus7
NM_001170593.1	0.407346	-1.29567	0.0214648	Down	Chat
NM_001170595.1	6.44222	2.68756	0.0164854	Up	Gpr132
NM_001170600.1	0.347643	-1.52432	0.001836	Down	Myh11
NM_001172089.1	2.47914	1.30984	0.0101518	Up	Gemin5
NM_001172120.2	6.35882	2.66876	2.54e-05	Up	Tlr1
NM_001173334.1	2.35586	1.23625	0.0125392	Up	Slc25a32
NM_001173386.1	15.8646	3.98774	0.0436717	Up	Clec7a
NM_001173427.1	3.58206	1.84079	0.00383177	Up	Dram1
NM_001173433.1	0	#NAME?	4.92e-11	Down	Tle1
NM_001173450.1	0.470428	-1.08795	0.0203646	Down	Aak1
NM_001173471.1	0.48178	-1.05355	0.0443255	Down	Lyrm9
NM_001173557.1	0.378444	-1.40185	0.018339	Down	RGD1311756
NM_001177321.1	2.2802	1.18916	0.00742423	Up	Tfpi
NM_001177326.2	0.294468	-1.76381	0.00697761	Down	Hoxc8
NM_001177368.1	0.420713	-1.24909	0.00977143	Down	Lrrn2
NM_001177682.1	83.7343	6.38775	0.000936889	Up	P2ry10
NM_001177695.1	0.399162	-1.32495	0.0109212	Down	Ablim2
NM_001184973.1	18.4387	4.20466	0.0162515	Up	Oscar
NM_001190237.1	0.440719	-1.18207	0.0101796	Down	Psap
NM_001190372.1	0.380939	-1.39237	0.00422088	Down	Ankrd29
NM_001190998.1	0.41156	-1.28082	0.0433942	Down	Smtnl2
NM_001191043.1	0.407734	-1.2943	0.00469061	Down	Ryr2
NM_001191077.1	2.5763	1.3653	0.0171465	Up	Paqr6
NM_001191110.1	0.385369	-1.37569	0.00369484	Down	Celsr2
NM_001191113.1	0.412349	-1.27806	0.00717465	Down	Cpne6
NM_001191548.1	3.21775	1.68605	0.00553329	Up	Ddx54
NM_001191552.1	2.04995	1.03559	0.0354175	Up	Whsc1
NM_001191553.1	0.403739	-1.3085	0.022616	Down	Ccdc85a
NM_001191555.1	6.26154	2.64652	0.00522223	Up	Rab11fip1
NM_001191556.1	0.294575	-1.76329	0.00168257	Down	Wnk2
NM_001191565.1	13.1975	3.72219	0.00302251	Up	Ankrd33b
NM_001191576.1	0.389514	-1.36025	0.0286871	Down	Fbxo44
NM_001191577.1	182.028	7.50801	0.014187	Up	Midn
NM_001191578.1	0.19155	-2.38421	1.51e-06	Down	Phldb1
NM_001191581.1	72.4625	6.17916	0.00174111	Up	Trem3
NM_001191594.1	0.0568551	-4.13657	0.0233201	Down	Mgst3
NM_001191600.1	11.7854	3.55893	0.00448666	Up	Fhod1
NM_001191609.1	3.05516	1.61125	0.0079108	Up	Lama5
NM_001191624.1	3.30446	1.72441	0.0304053	Up	Lrrk1
NM_001191631.1	0.36818	-1.44152	0.0180645	Down	Plpp4
NM_001191633.1	0	#NAME?	0.0292999	Down	Fan1
NM_001191642.1	28.7419	4.84508	0.0101655	Up	Nlrp3
NM_001191659.1	8.26567	3.04713	0.00117551	Up	Parp14
NM_001191661.1	2.27088	1.18325	0.00942073	Up	Urb1
NM_001191666.1	0.413337	-1.27461	0.0357536	Down	Tchp
NM_001191681.1	0.368539	-1.44011	0.00135463	Down	Nat8l
NM_001191700.1	2.69931	1.43259	0.0347088	Up	Otud4
NM_001191707.1	0.44097	-1.18125	0.0412327	Down	Plch1
NM_001191715.1	2.449	1.29219	0.00785866	Up	Slc30a7
NM_001191719.1	8.08098	3.01453	1.35e-06	Up	Jmjd1c
NM_001191743.1	5.04056	2.33358	0.0117143	Up	Samhd1
NM_001191749.1	0.424295	-1.23686	0.0272052	Down	Dfna5
NM_001191752.1	0.0857029	-3.54451	0.0306896	Down	Ccdc77
NM_001191780.1	2.3332	1.22231	0.0171721	Up	Scyl2
NM_001191784.1	6.5421	2.70975	0.00220315	Up	Srgap1
NM_001191785.1	3.84971	1.94475	0.00381575	Up	Nop2
NM_001191787.1	0	#NAME?	0.000975921	Down	Foxred2
NM_001191794.1	0.371314	-1.42929	0.0167759	Down	Cln6
NM_001191796.1	0.46202	-1.11397	0.0403057	Down	Elovl4
NM_001191800.1	0.474831	-1.07451	0.0385941	Down	Dclk3
NM_001191804.1	0.336082	-1.57312	0.0015512	Down	Tmem151b
NM_001191811.1	0.286038	-1.80572	0.0023864	Down	Sgpp2
NM_001191817.1	0.485827	-1.04149	0.0366551	Down	Hhip
NM_001191822.1	0.415409	-1.26739	0.0127628	Down	Rhbdl1
NM_001191828.1	6.2859	2.65212	0.000245033	Up	Scyl3
NM_001191836.2	0.431664	-1.21202	0.0110262	Down	Gnal
NM_001191845.1	0.212147	-2.23687	0.00124957	Down	Hey1
NM_001191859.1	6.67831	2.73948	1.24e-05	Up	Rbm33
NM_001191861.1	399.676	8.64269	0.00300923	Up	Cdk6
NM_001191862.1	12.6695	3.66329	3.95e-13	Up	Flnc
NM_001191874.1	0.269967	-1.88914	0.000589844	Down	Garem2
NM_001191876.1	2.04853	1.03459	0.0447387	Up	Syde1
NM_001191879.3	0.353084	-1.50191	0.00349192	Down	Scrib
NM_001191891.1	0.204847	-2.28738	0.010578	Down	C1qtnf9
NM_001191894.1	0.36181	-1.4667	0.00413382	Down	Stk32a
NM_001191921.1	0.36781	-1.44297	0.0275207	Down	Zfp286a
NM_001191922.1	0	#NAME?	0.00640923	Down	Shisa6
NM_001191923.1	13.8354	3.79029	0.029558	Up	Pik3r5
NM_001191930.1	18.5573	4.21392	0.0095494	Up	Uap1
NM_001191932.1	28.6263	4.83927	0.0311097	Up	Slamf6
NM_001191939.1	25.5388	4.67462	0.0127565	Up	Msr1
NM_001191947.1	0.475421	-1.07272	0.0226758	Down	Dact3
NM_001191951.1	4.65211	2.21788	0.0324528	Up	Ahnak
NM_001191960.1	2.36513	1.24192	0.00861059	Up	Tsc22d2
NM_001191966.1	0.42174	-1.24558	0.00961569	Down	Napb
NM_001191975.1	0	#NAME?	0.0274407	Down	Srgap3
NM_001191981.1	0.417689	-1.2595	0.0406688	Down	Sntg1
NM_001191991.1	0.40459	-1.30547	0.00953582	Down	Fam19a5
NM_001192004.1	6.40158	2.67843	6.12e-08	Up	Rps6ka3
NM_001195277.1	0.42848	-1.2227	0.00808476	Down	Tmem178b
NM_001195559.1	0.445589	-1.16622	0.0106632	Down	Camta1
NM_001197023.1	0.204898	-2.28702	3.78e-05	Down	RGD1307443
NM_001197241.1	4.44258	2.1514	0.00182018	Up	Rab11fip1
NM_001197907.1	0.324645	-1.62306	0.000576415	Down	Oxr1
NM_001198583.2	0.406031	-1.30034	0.0154085	Down	Grin3a
NM_001198589.1	19.3122	4.27144	0.0008808	Up	Tead1
NM_001202463.1	6.27926	2.65059	0.0290413	Up	Cd300le
NM_001244867.1	4.94906	2.30715	0.0382205	Up	Crip1
NM_001245978.1	0.302383	-1.72555	0.0114421	Down	Frem2
NM_001256509.1	23.6419	4.56327	3.61e-15	Up	Fosb
NM_001257278.2	63.1064	5.97972	1.11e-05	Up	Il31ra
NM_001261389.1	0.437619	-1.19225	0.0486772	Down	Kcnip1
NM_001270544.1	0.439217	-1.187	0.0105683	Down	Mapk9
NM_001270582.1	0.429989	-1.21763	0.0370996	Down	Adcyap1r1
NM_001270592.1	0.249426	-2.00332	0.0106295	Down	Tmem176b
NM_001270593.1	0.273445	-1.87068	0.000871696	Down	Tmem176b
NM_001270598.1	2.83649	1.50411	0.0215713	Up	Igf2bp2
NM_001270599.1	2.83649	1.50411	0.0215713	Up	Igf2bp2
NM_001270608.1	0.427777	-1.22507	0.0102464	Down	Grin1
NM_001270624.1	0.434397	-1.20291	0.0264952	Down	Dync1i2
NM_001270627.1	0.396901	-1.33315	0.00558561	Down	Nsmf
NM_001270633.1	0	#NAME?	0.0259809	Down	Bdnf
NM_001270655.1	0.287572	-1.79801	0.00476643	Down	Ntrk3
NM_001270689.1	17.6034	4.13779	4.5e-07	Up	Fxyd5
NM_001270713.1	3.10522	1.6347	0.0443477	Up	Bdkrb2
NM_001270762.1	12.8239	3.68077	6.34e-07	Up	Rnh1
NM_001270763.1	14.077	3.81527	0.000397685	Up	Rnh1
NM_001270772.1	0.405082	-1.30371	0.0105811	Down	Slc8a1
NM_001270796.1	0.434753	-1.20173	0.0229393	Down	Pla2g6
NM_001270802.1	2.98698	1.57869	0.00309595	Up	Kpna2
NM_001270808.1	65.6458	6.03663	1.36e-05	Up	Sphk1
NM_001270809.1	Inf	Inf	3.23e-06	Up	Sphk1
NM_001270810.1	76.0044	6.24801	7.49e-09	Up	Sphk1
NM_001270836.1	8.06246	3.01122	0.000200238	Up	Dusp14
NM_001270843.1	2.78665	1.47853	0.0139306	Up	Inppl1
NM_001270858.1	0.42495	-1.23463	0.0262713	Down	Stmn4
NM_001270861.1	5.25901	2.39479	0.0168419	Up	Slc4a7
NM_001270863.1	0.458706	-1.12436	0.0150522	Down	Ndrg2
NM_001270889.1	10.6018	3.40623	0.000903232	Up	Acp5
NM_001270954.1	2.19508	1.13427	0.0469243	Up	Rasd1
NM_001270981.1	0.449701	-1.15296	0.013893	Down	Fndc5
NM_001270983.1	4.34868	2.12058	0.0490645	Up	Ppp1cc
NM_001271045.1	0.443817	-1.17196	0.0100599	Down	Scn1b
NM_001271046.2	0.384036	-1.38069	0.00263828	Down	Scn1b
NM_001271055.1	0.38571	-1.37441	0.00254896	Down	Tmem59l
NM_001271057.1	3.29631	1.72085	0.0108551	Up	Ptbp1
NM_001271081.1	0.338364	-1.56335	0.000639601	Down	Lrrc4b
NM_001271089.2	2.73127	1.44957	0.00115586	Up	Slc3a2
NM_001271091.1	0.346815	-1.52776	0.00493056	Down	Ndrg4
NM_001271102.1	15.5588	3.95966	0.00360888	Up	Crem
NM_001271109.1	0.344166	-1.53882	0.0036438	Down	Maged2
NM_001271118.1	0.212687	-2.2332	0.00393175	Down	Nrg1
NM_001271123.1	7.04757	2.81713	0.0055667	Up	Nrg1
NM_001271130.1	0	#NAME?	0.0279974	Down	Nrg1
NM_001271135.1	0.00790176	-6.98361	0.00215131	Down	Ulk3
NM_001271143.1	52.5126	5.71459	0.000546714	Up	S1pr3
NM_001271167.1	18.5672	4.21469	1.98e-05	Up	Fnip2
NM_001271192.1	0.473372	-1.07895	0.0242726	Down	Fzd10
NM_001271199.1	0.340179	-1.55564	0.00143113	Down	Fhl1
NM_001271210.1	0.252403	-1.9862	0.012329	Down	Ralgapb
NM_001271226.2	0.474244	-1.0763	0.0257514	Down	Chd5
NM_001271227.1	0.3613	-1.46873	0.00554658	Down	Tfe3
NM_001271228.1	0.428028	-1.22422	0.020364	Down	Pcdh11x
NM_001271229.1	0.404339	-1.30636	0.0315137	Down	Pstk
NM_001271230.1	0.494807	-1.01506	0.0394836	Down	Ttbk1
NM_001271240.1	Inf	Inf	0.000202291	Up	Traf1
NM_001271250.1	0.446108	-1.16454	0.0147143	Down	Stxbp5l
NM_001271253.1	0.458502	-1.125	0.0243208	Down	Unc79
NM_001271275.1	3.59045	1.84417	0.00198659	Up	Zswim8
NM_001271299.1	0.321959	-1.63505	0.0063175	Down	Sptssb
NM_001271301.1	0.318099	-1.65245	0.00241683	Down	Sptssb
NM_001271323.1	2.57711	1.36576	0.0167693	Up	Snrpa1
NM_001271332.2	0.457169	-1.1292	0.0195645	Down	Fhod3
NM_001271340.2	4.4966	2.16884	1.61e-05	Up	RGD1563365
NM_001271345.1	2.65169	1.40691	0.0154307	Up	E2f4
NM_001271365.1	0.120091	-3.0578	2.1e-05	Down	Ldlrad4
NM_001271381.1	0.471746	-1.08392	0.0273865	Down	Nkd1
NM_001271385.1	0.338868	-1.5612	0.00534641	Down	Prmt8
NM_001271410.1	2.39739	1.26146	0.0196153	Up	Evi5
NM_001271438.1	0.398294	-1.32809	0.00645953	Down	Slc9a9
NM_001271454.1	0.414339	-1.27112	0.0246557	Down	Igsf21
NM_001271480.1	15.9967	3.9997	0.00298257	Up	Themis2
NM_001271488.1	2.15652	1.10871	0.0140593	Up	Ints6
NM_001271502.1	0.468701	-1.09326	0.0260593	Down	Ctnnd2
NM_001271710.1	4.79096	2.26031	0.0038614	Up	Angptl8
NM_001276470.1	0.475639	-1.07206	0.0271549	Down	Prrt2
NM_001276472.1	0.374767	-1.41594	0.0104982	Down	Hmgcll1
NM_001276477.1	3.15891	1.65943	0.0221282	Up	Rps27l
NM_001276708.1	0.274824	-1.86342	0.000108486	Down	Srebf1
NM_001276711.1	4.32999	2.11436	0.00552085	Up	Nfkb1
NM_001276720.1	0.389778	-1.35928	0.0367178	Down	Otof
NM_001276762.1	0.330915	-1.59547	0.0482764	Down	Epm2a
NM_001277055.1	36.199	5.17788	0.000222393	Up	Ngf
NM_001277069.1	0.379683	-1.39713	0.00625797	Down	Ric3
NM_001277160.1	0.275272	-1.86107	0.0194468	Down	Rbm26
NM_001277178.1	3.21685	1.68565	0.0272837	Up	Kdm5a
NM_001277235.1	2.68422	1.4245	0.0457788	Up	Sec23b
NM_001277243.1	2.02105	1.01511	0.0456471	Up	Rps5
NM_001277341.1	2.23337	1.15922	0.0299716	Up	Efemp2
NM_001277394.1	0.451317	-1.14779	0.027508	Down	Srrm3
NM_001278484.2	10.3127	3.36635	0.0322174	Up	Runx2
NM_001282336.1	0.315509	-1.66425	0.000356665	Down	Enho
NM_001287110.1	6.79537	2.76455	0.00376899	Up	Vegfa
NM_001287113.1	10.8614	3.44114	0.00281069	Up	Vegfa
NM_001287114.1	92.6508	6.53373	0.00305342	Up	Vegfa
NM_001289737.1	39.8651	5.31706	0.00182589	Up	Cryaa
NM_001289778.1	0.458495	-1.12502	0.0147288	Down	Map7d2
NM_001301715.1	8.99588	3.16927	5.11e-05	Up	Cebpb
NM_001301720.1	8.99588	3.16927	5.11e-05	Up	Cebpb
NM_001301736.1	0.355784	-1.49093	0.0101775	Down	Tpm1
NM_001302083.1	5.90549	2.56206	0.00549117	Up	Odc1
NM_001302089.1	0.138689	-2.85007	0.00400242	Down	Slc1a2
NM_001302211.1	0.355235	-1.49315	0.0184914	Down	Adgrl2
NM_001302217.1	0.440003	-1.18442	0.0117701	Down	Elavl2
NM_001302967.1	4.054	2.01935	0.00504956	Up	Col16a1
NM_001304287.1	0.264436	-1.91901	0.0235687	Down	Dlgap1
NM_001304734.1	0.0229746	-5.44382	0.0232128	Down	Oprm1
NM_001304816.1	0.460864	-1.11759	0.013568	Down	Peg3
NM_001305047.1	0.271238	-1.88237	0.0230721	Down	Nfe2l3
NM_001305240.1	6.92202	2.79119	0.000146325	Up	Xrn1
NM_001305276.1	4.04125	2.0148	5.54e-05	Up	Helz2
NM_001305279.1	2.21183	1.14524	0.0126776	Up	Edem1
NM_001305463.1	3.73949	1.90284	0.000146029	Up	Rcor1
NM_001305877.1	4.5853	2.19702	0.00241189	Up	Myh9
NM_001308239.1	11.3355	3.50277	0.0091015	Up	Nes
NM_001308254.1	6.3391	2.66428	0.000394759	Up	Ahr
NM_001308255.1	4.01764	2.00635	0.0312731	Up	Ahr
NM_001309381.1	3.60157	1.84863	2.7e-05	Up	Flt1
NM_001309404.1	0.310846	-1.68573	0.0105285	Down	Kcnn2
NM_001309453.1	3.17447	1.66652	0.00357004	Up	Sec24d
NM_001309463.1	0.293602	-1.76807	0.00686985	Down	Prrt3
NM_001309820.1	6.85695	2.77757	0.000386591	Up	Chi3l1
NM_001313843.1	3.47116	1.79542	0.0077049	Up	Mrpl17
NM_001314068.1	3.76601	1.91304	0.0400527	Up	Mpz
NM_001316877.1	0.472152	-1.08268	0.0153873	Down	Mdh1
NM_001317749.1	0.489948	-1.0293	0.0229601	Down	Aqp4
NM_001318948.1	0.396521	-1.33453	0.0136484	Down	Oprl1
NM_001329156.1	0.376397	-1.40967	0.0189008	Down	Tceal5
NM_001329198.1	2.28378	1.19142	0.0140099	Up	Rsl1d1
NM_001329199.1	2.28378	1.19142	0.0140099	Up	Rsl1d1l1
NM_012488.2	2.60828	1.3831	0.00116744	Up	A2m
NM_012491.2	6.47229	2.69428	0.00947625	Up	Add2
NM_012502.1	0.421923	-1.24495	0.0283161	Down	Ar
NM_012506.1	0.436609	-1.19559	0.00816797	Down	Atp1a3
NM_012508.5	0.397957	-1.32932	0.00327288	Down	Atp2b2
NM_012512.2	2.6368	1.39879	0.00833496	Up	B2m
NM_012515.2	9.741	3.28407	0.0116677	Up	Tspo
NM_012517.2	6.23632	2.6407	0.0236275	Up	Cacna1c
NM_012523.2	6.33808	2.66405	0.00936316	Up	Cd53
NM_012525.1	Inf	Inf	0.021843	Up	Cgm4
NM_012526.2	0.446385	-1.16364	0.0110679	Down	Chgb
NM_012532.2	4.37292	2.1286	3.83e-06	Up	Cp
NM_012534.4	14.9823	3.90519	0.000238524	Up	Cryaa
NM_012543.3	0.373358	-1.42137	0.00402955	Down	Dbp
NM_012550.2	3.93027	1.97463	0.000784208	Up	Ednra
NM_012551.2	4.23745	2.08319	1.4e-05	Up	Egr1
NM_012552.4	7.50369	2.9076	0.0146843	Up	Cela1
NM_012555.2	8.04129	3.00743	0.000146174	Up	Ets1
NM_012559.2	52.3091	5.70899	0.0333682	Up	Fgg
NM_012561.2	25.0933	4.64923	0.000330582	Up	Fst
NM_012572.1	0.357576	-1.48368	0.0121405	Down	Grik4
NM_012573.3	0.38572	-1.37437	0.0136032	Down	Grin2a
NM_012575.3	0.080446	-3.63584	0.012738	Down	Grin2c
NM_012580.2	50.7343	5.66489	4.95e-30	Up	Hmox1
NM_012582.2	117.556	6.8772	0.00012762	Up	Hp
NM_012588.2	8.69283	3.11983	0.00145085	Up	Igfbp3
NM_012589.2	1597.83	10.6419	3.75e-58	Up	Il6
NM_012591.1	5.51821	2.4642	8.14e-07	Up	Irf1
NM_012598.2	3.11389	1.63872	0.00112547	Up	Lpl
NM_012603.2	32.687	5.03065	7.42e-08	Up	Myc
NM_012607.2	0.324082	-1.62557	0.000239271	Down	Nefh
NM_012610.2	6.23851	2.6412	0.00915447	Up	Ngfr
NM_012611.3	490.94	8.9394	7.7e-05	Up	Nos2
NM_012612.2	0.364819	-1.45475	0.0251741	Down	Nppa
NM_012615.3	7.54048	2.91466	1.34e-07	Up	Odc1
NM_012618.2	5.21412	2.38243	0.00856718	Up	S100a4
NM_012620.1	619.61	9.27522	3.06e-15	Up	Serpine1
NM_012633.2	0.403094	-1.31081	0.0128535	Down	Prph
NM_012637.2	4.64348	2.21521	0.000367758	Up	Ptpn1
NM_012643.2	0.454106	-1.1389	0.0186276	Down	Ret
NM_012649.2	6.50134	2.70074	0.0020353	Up	Sdc4
NM_012654.1	8.09795	3.01756	0.00713566	Up	Slc9a3
NM_012660.2	0.448308	-1.15744	0.0109118	Down	Eef1a2
NM_012664.3	0.45554	-1.13435	0.0134511	Down	Syp
NM_012665.1	0.360238	-1.47298	0.00128881	Down	Syt2
NM_012673.2	0.372191	-1.42589	0.00161813	Down	Thy1
NM_012675.3	9.6463	3.26998	0.0358156	Up	Tnf
NM_012678.2	4.53182	2.18009	0.0194224	Up	Tpm4
NM_012686.2	0.403917	-1.30787	0.00396381	Down	Vsnl1
NM_012700.2	0.474426	-1.07574	0.0216113	Down	Stx1b
NM_012703.2	0.10365	-3.27021	0.00948919	Down	Thrsp
NM_012705.1	0.00677347	-7.20589	0.0251597	Down	Cd4
NM_012708.2	5.43788	2.44304	0.0389244	Up	Psmb9
NM_012711.1	5.63714	2.49496	2.14e-05	Up	Itgam
NM_012715.1	8.18728	3.03338	5.91e-07	Up	Adm
NM_012719.2	0.4347	-1.20191	0.0262793	Down	Sstr1
NM_012721.2	0.475238	-1.07328	0.0252362	Down	P2rx6
NM_012731.2	0.481967	-1.05299	0.0262578	Down	Ntrk2
NM_012733.4	3.89538	1.96176	0.0484175	Up	Rbp1
NM_012735.2	16.4672	4.04153	0.00349526	Up	Hk2
NM_012737.1	Inf	Inf	6.4e-06	Up	Apoa4
NM_012746.1	0.448958	-1.15535	0.0163436	Down	Pcsk2
NM_012747.2	4.6507	2.21745	2.76e-07	Up	Stat3
NM_012749.2	2.75357	1.4613	0.00801978	Up	Ncl
NM_012759.2	4.71415	2.237	0.0131824	Up	Vav1
NM_012765.3	0.405528	-1.30213	0.0053857	Down	Htr2c
NM_012771.3	11.6465	3.54182	0.0117354	Up	Lyz2
NM_012779.1	8.23909	3.04248	0.0188218	Up	Aqp5
NM_012800.1	0.467823	-1.09596	0.028192	Down	P2ry1
NM_012801.1	2.62191	1.39062	0.00693477	Up	Pdgfa
NM_012806.2	0.461983	-1.11409	0.0192455	Down	Mapk10
NM_012813.2	0.336547	-1.57112	0.00357829	Down	St8sia1
NM_012825.4	0.490512	-1.02764	0.0232201	Down	Aqp4
NM_012830.1	10.0763	3.3329	0.046575	Up	Cd2
NM_012831.1	Inf	Inf	1.9e-14	Up	Cebpg
NM_012832.3	0.351252	-1.50942	0.0249968	Down	Chrna7
NM_012838.2	2.07421	1.05257	0.0135543	Up	Cstb
NM_012843.2	28.0133	4.80804	9.7e-05	Up	Emp1
NM_012844.3	12.09	3.59574	0.028393	Up	Ephx1
NM_012848.2	2.11034	1.07748	0.0113651	Up	Fth1
NM_012854.2	Inf	Inf	0.0178476	Up	Il10
NM_012856.1	0.48885	-1.03254	0.0471571	Down	Kcnc1
NM_012862.1	5.48068	2.45435	0.0408932	Up	Mgp
NM_012867.1	2.13158	1.09192	0.0216615	Up	Ninj1
NM_012868.1	0.170372	-2.55324	0.0238958	Down	Npr3
NM_012869.1	0.286754	-1.80211	0.0135968	Down	Npy5r
NM_012875.2	3.4085	1.76914	0.0356892	Up	Rpl39
NM_012877.1	0.429268	-1.22005	0.0178931	Down	Scn2b
NM_012886.2	21.5964	4.43272	0.0202142	Up	Timp3
NM_012904.2	24.6332	4.62253	0.00899219	Up	Anxa1
NM_012905.2	0.317162	-1.65671	0.0102561	Down	Speg
NM_012912.2	10.2451	3.35687	1.85e-09	Up	Atf3
NM_012916.2	0.272149	-1.87753	0.0002111	Down	Bcan
NM_012924.2	15.9179	3.99258	7.95e-05	Up	Cd44
NM_012931.1	7.08704	2.82518	0.0475029	Up	Bcar1
NM_012934.1	0.485622	-1.0421	0.0399154	Down	Dpysl3
NM_012935.4	5.97548	2.57906	0.00266521	Up	Cryab
NM_012945.1	43.087	5.42918	5.01e-06	Up	Hbegf
NM_012948.1	2.13975	1.09744	0.0458054	Up	Emd
NM_012952.1	0.379997	-1.39594	0.0111058	Down	Fgf9
NM_012953.1	306.304	8.25882	1.03e-17	Up	Fosl1
NM_012954.1	9.21958	3.2047	0.000393993	Up	Fosl2
NM_012959.1	2.07749	1.05484	0.0373539	Up	Gfra1
NM_012967.1	15.2868	3.93421	7.09e-10	Up	Icam1
NM_012968.1	3.4184	1.77332	0.0118481	Up	Il1rap
NM_012976.2	9.38223	3.22993	0.0400428	Up	Lgals5
NM_012987.2	15.5768	3.96132	0.00297838	Up	Nes
NM_012992.4	2.89918	1.53564	0.0119794	Up	Npm1
NM_012994.2	0.401686	-1.31586	0.00720907	Down	Nxph1
NM_012998.2	2.30265	1.2033	0.00557233	Up	P4hb
NM_013002.4	0.413978	-1.27237	0.00684729	Down	Pcp4
NM_013018.2	0.406291	-1.29941	0.00451845	Down	Rab3a
NM_013025.2	88.2214	6.46306	1.77e-08	Up	Ccl3
NM_013026.2	20.8656	4.38305	5.06e-06	Up	Sdc1
NM_013031.1	20.5203	4.35898	1.95e-05	Up	Slc18a2
NM_013033.2	112.751	6.81699	0.0497186	Up	Slc5a1
NM_013037.1	2694.81	11.396	0.00108024	Up	Il1rl1
NM_013046.3	3.61109	1.85244	0.0128843	Up	Trh
NM_013047.3	0.273084	-1.87258	0.00246905	Down	Trhr
NM_013055.1	0.392314	-1.34992	0.00624991	Down	Map3k12
NM_013058.2	4.32031	2.11114	0.000220103	Up	Id3
NM_013059.1	3.30729	1.72565	0.0303181	Up	Alpl
NM_013062.1	2.17392	1.1203	0.0439419	Up	Kdr
NM_013069.2	3.22283	1.68833	0.0002763	Up	Cd74
NM_013071.2	0.286478	-1.8035	0.0160483	Down	Oprm1
NM_013083.2	3.13645	1.64913	8.97e-05	Up	Hspa5
NM_013085.3	58.18	5.86245	4.37e-06	Up	Plau
NM_013090.2	0.365548	-1.45187	0.00121545	Down	Vamp1
NM_013091.1	5.96267	2.57596	2.27e-07	Up	Tnfrsf1a
NM_013095.3	2.89607	1.5341	0.0450539	Up	Smad3
NM_013102.3	2.11517	1.08077	0.0121177	Up	Fkbp1a
NM_013106.1	2.88079	1.52647	0.00577771	Up	Gnai3
NM_013113.2	0.397611	-1.33057	0.00320002	Down	Atp1b1
NM_013123.3	Inf	Inf	0.0343138	Up	Il1r1
NM_013131.1	0.366603	-1.44771	0.00303092	Down	Nr3c2
NM_013132.1	3.23309	1.69291	0.0493762	Up	Anxa5
NM_013133.1	0.422119	-1.24428	0.00859997	Down	Glra1
NM_013138.1	5.1421	2.36236	0.00142241	Up	Itpr3
NM_013141.2	3.06418	1.6155	0.000477133	Up	Ppard
NM_013146.2	2.20973	1.14387	0.0219497	Up	Cald1
NM_013153.1	5.42886	2.44065	1.07e-05	Up	Has2
NM_013154.2	14.3678	3.84476	2.19e-16	Up	Cebpd
NM_013156.2	2.1678	1.11623	0.00999431	Up	Ctsl
NM_013166.1	2.37976	1.25081	0.00366584	Up	Cntf
NM_013169.1	8.31881	3.05638	0.0445488	Up	Cd3d
NM_013175.3	0.464091	-1.10752	0.0167263	Down	Scg5
NM_013185.3	5.92924	2.56785	0.00108317	Up	Hck
NM_013188.1	0.460484	-1.11878	0.0120053	Down	Pygb
NM_013195.1	76.0786	6.24942	0.016707	Up	Il2rb
NM_013214.4	0.496559	-1.00996	0.0277231	Down	Acot7
NM_013219.1	0.381079	-1.39184	0.00235798	Down	Cadps
NM_013225.1	0.354242	-1.49719	0.0035346	Down	Cntn6
NM_017011.1	0.160104	-2.64292	2.14e-06	Down	Grm1
NM_017012.1	0.408051	-1.29318	0.00864146	Down	Grm5
NM_017019.1	166.524	7.37959	1.2e-15	Up	Il1a
NM_017020.3	7.67635	2.94042	0.00361123	Up	Il6r
NM_017022.2	2.87059	1.52135	0.003802	Up	Itgb1
NM_017025.1	11.2534	3.49229	0.00192854	Up	Ldha
NM_017027.2	3.76601	1.91304	0.0400527	Up	Mpz
NM_017029.2	0.311752	-1.68153	0.000144487	Down	Nefm
NM_017031.2	2.0032	1.0023	0.0174943	Up	Pde4b
NM_017034.1	9.71233	3.27982	0.00169566	Up	Pim1
NM_017037.1	3.76221	1.91158	0.0404136	Up	Pmp22
NM_017041.1	0.465027	-1.10461	0.0169246	Down	Ppp3ca
NM_017048.2	2.21417	1.14677	0.00978898	Up	Slc4a2
NM_017051.2	2.29525	1.19865	0.00433376	Up	Sod2
NM_017054.1	8.2529	3.0449	0.0408522	Up	Tbxa2r
NM_017058.1	12.1409	3.6018	0.0242138	Up	Vdr
NM_017062.2	3.1806	1.6693	0.000184838	Up	Pdlim4
NM_017064.1	2.1564	1.10863	0.021029	Up	Stat5a
NM_017065.1	0.486551	-1.03934	0.0388298	Down	Gabrb3
NM_017076.2	14.7169	3.8794	3.69e-06	Up	PVR
NM_017092.1	0.459737	-1.12112	0.0142031	Down	Tyro3
NM_017103.2	2.10244	1.07207	0.0186614	Up	Tceb3
NM_017104.2	3918.26	11.936	5.2e-39	Up	Csf3
NM_017107.2	0.323387	-1.62867	0.000425041	Down	Ogt
NM_017109.1	0.425644	-1.23228	0.0376128	Down	Syn3
NM_017119.2	12.4646	3.63976	0.00434937	Up	Gzmk
NM_017123.1	11.8563	3.56758	0.0179346	Up	Areg
NM_017125.3	5.80603	2.53755	0.000214683	Up	Cd63
NM_017126.1	4.48536	2.16522	0.0438958	Up	Fdx1
NM_017128.2	Inf	Inf	0.0326155	Up	Inhba
NM_017133.1	4.12062	2.04286	0.0178413	Up	Thbs4
NM_017134.3	23.1565	4.53334	0.0314747	Up	Arg1
NM_017142.1	0.484925	-1.04417	0.0474946	Down	Adcy8
NM_017152.3	2.02494	1.01788	0.0481099	Up	Rps17
NM_017154.1	6.11758	2.61296	0.0489457	Up	Xdh
NM_017160.1	Inf	Inf	0.0475315	Up	Rps6
NM_017172.1	3.08632	1.62589	0.000295574	Up	Zfp36l1
NM_017173.1	2.52181	1.33446	0.0482071	Up	Serpinh1
NM_017180.2	11.502	3.52381	1.53e-05	Up	Phlda1
NM_017183.1	294.322	8.20125	6.65e-08	Up	Cxcr2
NM_017192.1	2.1991	1.13692	0.0249005	Up	S1pr2
NM_017198.1	0.431211	-1.21354	0.0390273	Down	Pak1
NM_017200.1	5.64861	2.4979	0.000260886	Up	Tfpi
NM_017203.1	0.442212	-1.17719	0.0107198	Down	Gdf11
NM_017208.2	10.4678	3.38788	0.0498523	Up	Lbp
NM_017210.4	189.237	7.56405	5.11e-09	Up	Dio3
NM_017212.2	0.485807	-1.04154	0.0242736	Down	Mapt
NM_017221.1	17.5071	4.12987	0.000234843	Up	Shh
NM_017227.1	32.6265	5.02797	0.00909498	Up	Padi4
NM_017232.3	33.2338	5.05458	0.0029561	Up	Ptgs2
NM_017237.3	0.417696	-1.25947	0.00548944	Down	Uchl1
NM_017244.1	5.29939	2.40583	0.000467471	Up	Crabp2
NM_017255.1	9.2477	3.20909	0.00276165	Up	P2ry2
NM_017257.2	2.34311	1.22843	0.00692924	Up	Psme2
NM_017258.1	5.75431	2.52464	0.0347376	Up	Btg1
NM_017259.1	3.27888	1.7132	0.00651911	Up	Btg2
NM_017260.2	8.45493	3.07979	0.0144998	Up	Alox5ap
NM_017263.2	0.479149	-1.06145	0.0448455	Down	Gria4
NM_017264.3	2.04646	1.03313	0.0345062	Up	Psme1
NM_017269.2	2.66499	1.41413	0.0354227	Up	Ptprj
NM_017294.1	0.446544	-1.16313	0.0132298	Down	Pacsin1
NM_017303.2	0.394924	-1.34035	0.00292708	Down	Kcnab1
NM_017304.2	0.382709	-1.38568	0.0046426	Down	Kcnab2
NM_017325.2	19.1881	4.26214	0.0015803	Up	Runx1
NM_017334.2	6.2337	2.64009	0.00245072	Up	Crem
NM_017336.1	0.140944	-2.8268	0.00301611	Down	Ptpro
NM_017350.1	118.213	6.88525	0.00212708	Up	Plaur
NM_017353.1	4.7187	2.23839	0.0186277	Up	Slc7a5
NM_017354.1	0.444705	-1.16908	0.02361	Down	Ntm
NM_017357.1	0.370081	-1.43409	0.0334991	Down	Hpcal4
NM_017361.1	3.01238	1.5909	0.000926044	Up	Nup54
NM_017365.2	5.07702	2.34398	0.0129966	Up	Pdlim1
NM_019123.1	0.440245	-1.18362	0.0131847	Down	St6galnac3
NM_019128.5	0.420313	-1.25046	0.00711334	Down	Ina
NM_019133.2	0.461212	-1.1165	0.0301666	Down	Syn1
NM_019139.1	Inf	Inf	4.14e-05	Up	Gdnf
NM_019141.2	0.385415	-1.37552	0.0284623	Down	Tle4
NM_019143.2	5.21186	2.3818	0.0472603	Up	Fn1
NM_019144.2	Inf	Inf	0.0299377	Up	Acp5
NM_019153.3	2.23325	1.15915	0.0386128	Up	Fbln5
NM_019155.2	63.4194	5.98685	4.43e-05	Up	Cav3
NM_019159.1	0.446834	-1.16219	0.0152976	Down	Syn2
NM_019160.2	0.387091	-1.36926	0.00659603	Down	Uts2
NM_019161.2	0.42167	-1.24581	0.0152213	Down	Cdh22
NM_019163.3	5.80086	2.53627	0.0442602	Up	Psen1
NM_019166.2	0.457276	-1.12886	0.0173682	Down	Syngr1
NM_019167.2	0.465971	-1.10169	0.0162875	Down	Sptbn2
NM_019169.2	2.16067	1.11148	0.0131751	Up	Snca
NM_019174.3	2.84556	1.50871	0.0133944	Up	Car4
NM_019176.2	0.367074	-1.44586	0.00649709	Down	Stmn4
NM_019177.3	31.851	4.99327	0.00140979	Up	Sell
NM_019186.1	2.04627	1.03299	0.0363779	Up	Arl4a
NM_019191.2	3.1142	1.63886	0.0025495	Up	Smad2
NM_019193.2	2.34872	1.23187	0.00436514	Up	Sox10
NM_019194.2	0.471545	-1.08453	0.022098	Down	Tef
NM_019195.2	2.0711	1.05039	0.0255955	Up	Cd47
NM_019211.2	0.451436	-1.14741	0.0344006	Down	Rasgrp1
NM_019216.2	9.34753	3.22459	0.000628772	Up	Gdf15
NM_019229.2	2.01785	1.01282	0.0484923	Up	Slc12a4
NM_019234.1	0.158514	-2.65731	0.0262847	Down	Dync1i1
NM_019235.2	6.77761	2.76078	0.00872305	Up	Ggt5
NM_019242.1	6.19957	2.63217	3.77e-08	Up	Ifrd1
NM_019253.3	0.432459	-1.20936	0.025455	Down	Ptpn5
NM_019266.2	0.361586	-1.46759	0.00121285	Down	Scn8a
NM_019278.1	0.472258	-1.08235	0.0229464	Down	Resp18
NM_019280.1	11.2386	3.49039	1.57e-07	Up	Gja5
NM_019281.2	0.333023	-1.58631	0.00835901	Down	Gjd2
NM_019284.1	0.485315	-1.04301	0.0344796	Down	Cspg5
NM_019285.2	5.95149	2.57325	6.66e-05	Up	Adcy4
NM_019289.2	6.10515	2.61003	0.00953648	Up	Arpc1b
NM_019290.1	3.37751	1.75596	0.000710835	Up	Btg3
NM_019304.1	0.366958	-1.44631	0.00550057	Down	Dgkb
NM_019305.2	4.46666	2.1592	1.92e-05	Up	Fgf2
NM_019314.2	0.365996	-1.4501	0.0408937	Down	Kcnn2
NM_019316.1	5.08077	2.34505	0.0102648	Up	Mafb
NM_019328.3	8.10738	3.01923	4.8e-07	Up	Nr4a2
NM_019329.2	0.151033	-2.72707	0.00135048	Down	Cntn3
NM_019335.1	2.32893	1.21967	0.00793787	Up	Eif2ak2
NM_019336.1	13.6888	3.77492	8.66e-06	Up	Rgs1
NM_019356.1	2.37315	1.2468	0.00531736	Up	Eif2s1
NM_019357.1	7.17121	2.84222	1.5e-05	Up	Ezr
NM_019358.1	12.3345	3.62463	5.73e-15	Up	Pdpn
NM_019359.1	2.05755	1.04093	0.0157632	Up	Cnn3
NM_019361.1	5.15622	2.36631	1.78e-06	Up	Arc
NM_019370.2	13.7819	3.7847	0.000140863	Up	Enpp3
NM_019386.2	8.92142	3.15727	0.000507811	Up	Tgm2
NM_019905.1	5.93145	2.56838	0.0127772	Up	Anxa2
NM_020074.2	10.7918	3.43186	0.00908994	Up	Srgn
NM_020088.1	0.418316	-1.25734	0.00941282	Down	Tenm2
NM_020094.2	0.184103	-2.44142	0.00206648	Down	Kcnip2
NM_020095.2	0.36435	-1.4566	0.049977	Down	Kcnip2
NM_020542.2	50.5417	5.6594	1.35e-05	Up	Ccr1
NM_021576.2	3.56479	1.83382	5.21e-05	Up	Nt5e
NM_021578.2	8.84787	3.14533	0.00817339	Up	Tgfb1
NM_021583.3	120.115	6.90828	1.12e-07	Up	Ptges
NM_021584.2	3.56509	1.83394	1.73e-05	Up	Dclk1
NM_021587.1	3.22225	1.68807	0.00548125	Up	Ltbp1
NM_021597.1	2.47694	1.30856	0.0211794	Up	Ago2
NM_021654.2	4.33703	2.11671	0.00844955	Up	Gja4
NM_021655.2	0.373028	-1.42265	0.00179964	Down	Chga
NM_021678.1	0.429518	-1.21921	0.0128333	Down	Camk2n2
NM_021682.1	0.452315	-1.1446	0.0152287	Down	Negr1
NM_021689.1	Inf	Inf	6.74e-17	Up	Ereg
NM_021691.2	4.80122	2.2634	0.0413709	Up	Twist2
NM_021693.2	2.20595	1.1414	0.0133954	Up	Sik1
NM_021696.2	104.825	6.71184	0.0202128	Up	Serpinb2
NM_021739.2	0.37613	-1.4107	0.00229289	Down	Camk2b
NM_021740.1	2.12918	1.0903	0.0112892	Up	Ptma
NM_021744.1	22.2047	4.47279	8.65e-09	Up	Cd14
NM_021746.1	0.386057	-1.37311	0.0152597	Down	Mapk12
NM_021748.1	0.447297	-1.1607	0.0105902	Down	Nsf
NM_021750.2	0.391034	-1.35463	0.0227394	Down	Csad
NM_021751.2	0.103041	-3.27872	4.38e-10	Down	Prom1
NM_021754.1	4.63014	2.21105	8.97e-05	Up	Nop58
NM_021758.1	0.387743	-1.36683	0.0118436	Down	Lin7b
NM_021767.2	0.499649	-1.00101	0.0291617	Down	Nrxn1
NM_021770.3	0.41317	-1.27519	0.00463941	Down	Olig1
NM_021835.3	2.8887	1.53042	0.00032687	Up	Jun
NM_021836.2	15.5436	3.95825	1.05e-13	Up	Junb
NM_021838.2	10.2367	3.35568	7.26e-05	Up	Nos3
NM_021844.2	2.71962	1.4434	0.00287518	Up	Kitlg
NM_021846.2	5.01301	2.32568	8.01e-07	Up	Mcl1
NM_021853.1	0.066691	-3.90636	6.99e-08	Down	Kcnt1
NM_021859.2	0.358487	-1.48001	0.0119064	Down	Matk
NM_021868.2	2.38793	1.25576	0.00528276	Up	Cttn
NM_022005.2	2.8031	1.48703	0.0155073	Up	Fxyd6
NM_022008.1	0.421591	-1.24608	0.00725546	Down	Fxyd7
NM_022179.2	70.909	6.1479	6.97e-06	Up	Hk3
NM_022187.1	2.4234	1.27703	0.007955	Up	Plk3
NM_022194.2	187.554	7.55116	1.39e-10	Up	Il1rn
NM_022196.2	Inf	Inf	2.85e-12	Up	Lif
NM_022197.2	9.9419	3.31352	1.56e-08	Up	Fos
NM_022209.3	0.461216	-1.11649	0.0136081	Down	Ppp2r2b
NM_022217.1	0.418398	-1.25705	0.00683903	Down	Amph
NM_022218.2	14.9002	3.89726	5.63e-05	Up	Cmklr1
NM_022221.1	155.191	7.2779	1.53e-10	Up	Mmp8
NM_022232.1	2.06156	1.04373	0.0192514	Up	Dnajc3
NM_022238.1	0.433571	-1.20566	0.0120489	Down	Abcb9
NM_022250.2	3.80509	1.92793	0.00747268	Up	Qtrt1
NM_022256.2	9.2316	3.20658	0.00131402	Up	Btc
NM_022265.2	0.376323	-1.40996	0.000628702	Down	Pdcd4
NM_022266.2	6.16492	2.62408	0.00226918	Up	Ctgf
NM_022268.1	8.37249	3.06566	0.0432945	Up	Pygl
NM_022269.2	9.88105	3.30466	0.00412777	Up	Cd55
NM_022270.1	2.13601	1.09492	0.0353749	Up	Slc22a4
NM_022276.1	Inf	Inf	0.00870102	Up	Gcnt1
NM_022277.1	4.54433	2.18407	0.00321243	Up	Casp8
NM_022278.1	2.55963	1.35593	0.00730811	Up	Glrx
NM_022297.2	3.58449	1.84177	0.00601188	Up	Ddah1
NM_022301.1	0.396278	-1.33542	0.00738219	Down	Pi4ka
NM_022379.1	13.1039	3.71193	0.00539087	Up	Tfec
NM_022393.2	2.60837	1.38315	0.0095563	Up	Clec10a
NM_022397.3	2.55789	1.35495	0.00380866	Up	Hnrnpf
NM_022401.2	9.38522	3.23039	0.00210558	Up	Plec
NM_022499.2	0.348216	-1.52194	0.0016498	Down	Pvalb
NM_022500.4	3.42025	1.7741	0.0179701	Up	Ftl1
NM_022509.1	3.43159	1.77888	0.00420316	Up	Smn1
NM_022511.2	2.53204	1.3403	0.0289078	Up	Pfn1
NM_022516.5	5.5377	2.46929	0.0035464	Up	Ptbp1
NM_022524.1	4.46539	2.15879	0.00740034	Up	Srpx
NM_022531.1	2.27142	1.18359	0.0227015	Up	Des
NM_022587.2	3.52557	1.81786	0.0337005	Up	Entpd1
NM_022600.1	0.485312	-1.04302	0.025207	Down	Adcy5
NM_022604.2	33.6588	5.07291	0.00638664	Up	Esm1
NM_022609.2	0.403312	-1.31003	0.0275069	Down	B3gat2
NM_022615.1	2.96995	1.57044	0.000428519	Up	Top1
NM_022624.1	0.366265	-1.44904	0.00238038	Down	Slc22a23
NM_022626.2	0.360515	-1.47187	0.00979753	Down	Phka1
NM_022666.1	0.437445	-1.19283	0.0174325	Down	Grm4
NM_022667.2	17.1571	4.10073	0.012011	Up	Slco2a1
NM_022689.2	2.3696	1.24464	0.0213795	Up	Snap23
NM_022705.1	18.9562	4.2446	0.0470768	Up	Olah
NM_022707.2	0.108794	-3.20033	0.0363461	Down	Pln
NM_022710.1	0.363569	-1.4597	0.00454369	Down	Pde1b
NM_022715.2	10.4889	3.39079	0.00502215	Up	Mvp
NM_022800.1	0.455268	-1.13521	0.041606	Down	P2ry12
NM_022847.1	0.386852	-1.37014	0.0280174	Down	Pgr
NM_022850.1	0.369873	-1.4349	0.00587272	Down	Dpp6
NM_022851.1	0.484652	-1.04498	0.0244103	Down	Aldh5a1
NM_022856.5	2.05117	1.03645	0.048349	Up	Nab1
NM_022860.2	0.301852	-1.72809	0.00132286	Down	B4galnt1
NM_022862.1	0.377847	-1.40413	0.0315294	Down	Unc13b
NM_022943.1	2.41922	1.27454	0.00768298	Up	Mertk
NM_023020.2	0.497561	-1.00706	0.0244897	Down	Tmeff1
NM_023021.2	Inf	Inf	0.000756854	Up	Kcnn4
NM_023023.1	0.433453	-1.20605	0.0166716	Down	Dpysl5
NM_023090.1	2.66563	1.41447	0.00368386	Up	Epas1
NM_023092.1	4.87469	2.28531	0.0124558	Up	Myo1c
NM_023954.1	0.451908	-1.1459	0.0130887	Down	Kcna6
NM_023955.1	2.7664	1.46801	0.00115307	Up	Scamp2
NM_023956.1	0.454703	-1.137	0.0195009	Down	Gucy1a2
NM_023959.1	2.29075	1.19582	0.00487283	Up	Adamts4
NM_023962.2	0.355062	-1.49386	0.0208176	Down	Pdgfd
NM_023970.1	29.1345	4.86466	4.06e-07	Up	Trpv4
NM_023978.2	0.315927	-1.66234	0.0387086	Down	Per3
NM_023981.4	7.00312	2.808	9.81e-05	Up	Csf1
NM_023985.1	9.6571	3.27159	3.45e-12	Up	Trib1
NM_023987.3	75.3455	6.23545	4.21e-06	Up	Birc3
NM_024000.1	0.477313	-1.06699	0.0247956	Down	Camkv
NM_024125.5	8.99588	3.16927	5.11e-05	Up	Cebpb
NM_024127.2	7.9811	2.99659	1.48e-05	Up	Gadd45a
NM_024128.3	0.432759	-1.20836	0.00869075	Down	Nsg1
NM_024129.1	2.28982	1.19523	0.0186206	Up	Dcn
NM_024146.1	2.08836	1.06237	0.0183033	Up	Fgfr1
NM_024150.2	2.36099	1.23939	0.00431158	Up	Arf2
NM_024151.1	3.23296	1.69286	0.0129609	Up	Arf4
NM_024152.2	2.46777	1.30321	0.00541294	Up	Arf6
NM_024154.2	0.43838	-1.18975	0.0155079	Down	Asic1
NM_024159.1	3.07811	1.62204	0.000405915	Up	Dab2
NM_024160.1	2.82168	1.49656	0.0410807	Up	Cyba
NM_024162.1	0.407144	-1.29639	0.0239523	Down	Fabp3
NM_024346.1	0.386021	-1.37325	0.00252404	Down	Stmn3
NM_024353.1	0.452062	-1.14541	0.018309	Down	Plcb4
NM_024354.1	0.484184	-1.04637	0.047415	Down	Chrna4
NM_024356.1	8.07458	3.01339	0.00511955	Up	Gch1
NM_024358.2	2.48714	1.31449	0.0074976	Up	Notch2
NM_024359.1	2.78374	1.47703	0.000747497	Up	Hif1a
NM_024360.3	2.4097	1.26885	0.0389795	Up	Hes1
NM_024375.1	0.248922	-2.00623	0.0496695	Down	Gdf10
NM_024378.1	0.434794	-1.2016	0.0150421	Down	Grid1
NM_024388.2	2.69278	1.4291	0.00265161	Up	Nr4a1
NM_024394.2	0.211367	-2.24218	0.0131621	Down	Htr3a
NM_024400.2	12.8465	3.6833	0.000199048	Up	Adamts1
NM_024403.2	3.1548	1.65755	0.000105366	Up	Atf4
NM_024483.1	0.459554	-1.12169	0.0445484	Down	Adra1d
NM_024489.1	2.67968	1.42206	0.00626644	Up	Zbtb10
NM_030829.1	24.8779	4.6368	1.91e-06	Up	Grk5
NM_030832.2	0.494307	-1.01652	0.029585	Down	Fabp7
NM_030834.1	Inf	Inf	4.51e-05	Up	Slc16a3
NM_030835.2	2.21099	1.14469	0.00854077	Up	Serp1
NM_030839.3	0.471312	-1.08524	0.0407118	Down	Syt13
NM_030845.1	485.344	8.92286	2.49e-18	Up	Cxcl1
NM_030848.1	16.7934	4.06983	0.0197262	Up	Bst1
NM_030854.1	4.41971	2.14395	0.045255	Up	Lect1
NM_030856.1	0.387173	-1.36895	0.00494415	Down	Lrrn3
NM_030857.2	4.22811	2.08001	0.00365611	Up	Lyn
NM_030863.1	6.62439	2.72779	0.00169945	Up	Msn
NM_030875.1	0.397208	-1.33203	0.0326244	Down	Scn1a
NM_030987.2	4.73432	2.24316	0.0331748	Up	Gnb1
NM_030989.3	3.16988	1.66443	0.0011382	Up	Tp53
NM_030991.3	0.402644	-1.31242	0.00380589	Down	Snap25
NM_030993.1	0.386026	-1.37323	0.0437795	Down	Ddn
NM_030994.2	2.85554	1.51376	0.0405089	Up	Itga1
NM_030995.1	0.466044	-1.10146	0.0146695	Down	Map1a
NM_031005.3	5.52196	2.46518	0.000104738	Up	Actn1
NM_031007.1	0.480517	-1.05734	0.0276198	Down	Adcy2
NM_031016.1	0.388875	-1.36262	0.00505407	Down	Chrm2
NM_031042.3	2.17552	1.12136	0.0192866	Up	Gtf2f2
NM_031055.1	100.909	6.65691	1.05e-05	Up	Mmp9
NM_031065.1	2.23665	1.16134	0.0438172	Up	Rpl10a
NM_031069.1	0.445779	-1.1656	0.0287636	Down	Nell1
NM_031074.2	3.88614	1.95834	0.00510257	Up	Nup98
NM_031091.2	0.41726	-1.26098	0.0127818	Down	Rab3b
NM_031101.1	2.02986	1.02138	0.0425577	Up	Rpl13
NM_031114.1	7.62215	2.9302	0.00451334	Up	S100a10
NM_031117.2	0.333003	-1.58639	0.0043041	Down	Snrpn
NM_031118.1	2.91067	1.54135	0.00291996	Up	Soat1
NM_031123.2	8.43043	3.07561	3.5e-09	Up	Stc1
NM_031132.3	2.24635	1.16758	0.0195471	Up	Tgfbr2
NM_031135.2	4.17514	2.06182	0.00128829	Up	Klf10
NM_031140.1	6.01857	2.58942	0.024767	Up	Vim
NM_031235.1	4.64631	2.21608	0.0481626	Up	Pard3
NM_031237.1	5.01057	2.32497	0.00191614	Up	Ube2d3
NM_031242.2	0.408636	-1.29111	0.00590538	Down	Cds1
NM_031325.1	17.586	4.13636	0.00167706	Up	Ugdh
NM_031327.2	8.06412	3.01152	6.9e-05	Up	Cyr61
NM_031328.1	2.22683	1.15499	0.0112432	Up	Bcl10
NM_031330.2	2.71022	1.43841	0.000962502	Up	Hnrnpab
NM_031346.1	4.50038	2.17005	0.00561151	Up	Ptbp3
NM_031347.1	0.403695	-1.30866	0.0318706	Down	Ppargc1a
NM_031349.2	0.223208	-2.16354	5.67e-05	Down	Aplnr
NM_031358.3	0.46829	-1.09453	0.0437689	Down	Kcnj11
NM_031512.2	114.137	6.83462	4.68e-10	Up	Il1b
NM_031514.1	4.19175	2.06755	0.000154081	Up	Jak2
NM_031515.3	Inf	Inf	0.00871903	Up	Kras
NM_031520.1	0.467455	-1.0971	0.0227319	Down	Myh10
NM_031524.1	3.10744	1.63573	0.00335016	Up	Pdgfb
NM_031528.2	8.6472	3.11223	0.0113705	Up	Rara
NM_031529.1	0.412205	-1.27856	0.025942	Down	Rarb
NM_031530.1	319.78	8.32094	1.43e-14	Up	Ccl2
NM_031531.1	18.0725	4.17572	1.25e-07	Up	Serpina3n
NM_031535.2	16.2906	4.02597	0.000328575	Up	Bcl2l1
NM_031538.2	7.16634	2.84124	0.037857	Up	Cd8a
NM_031563.3	2.21486	1.14722	0.0306674	Up	Ybx1
NM_031573.1	0.391028	-1.35466	0.0362098	Down	Phkg1
NM_031589.2	0.410236	-1.28548	0.0171111	Down	Slc37a4
NM_031591.1	2.66093	1.41193	0.00181509	Up	Pecam1
NM_031593.1	0.44088	-1.18154	0.0090711	Down	Sv2c
NM_031597.4	0.455132	-1.13564	0.0206142	Down	Kcnq3
NM_031610.3	0.372616	-1.42424	0.00735269	Down	Kcnj3
NM_031614.2	3.55664	1.83052	2.02e-05	Up	Txnrd1
NM_031621.1	2.47283	1.30616	0.0221475	Up	Sh2b3
NM_031628.1	3.17988	1.66897	0.0113662	Up	Nr4a3
NM_031630.2	0.443694	-1.17236	0.0250054	Down	Ddx25
NM_031633.3	Inf	Inf	0.0360173	Up	Foxm1
NM_031634.1	Inf	Inf	0.0157785	Up	Mefv
NM_031641.1	0.38056	-1.39381	0.00226927	Down	Sult4a1
NM_031642.4	5.41524	2.43703	1.79e-08	Up	Klf6
NM_031652.1	0.428707	-1.22194	0.0158901	Down	Kcnab3
NM_031659.1	Inf	Inf	1.68e-16	Up	Tgm1
NM_031663.2	0.342253	-1.54687	0.000939249	Down	Slc18a3
NM_031664.1	4.57505	2.19379	0.0133592	Up	Slc28a2
NM_031670.2	40.8362	5.35177	0.0026328	Up	Napsa
NM_031672.2	0.337277	-1.56799	0.000528507	Down	Slc15a2
NM_031675.2	2.96323	1.56717	0.0112946	Up	Actn4
NM_031676.2	0.416854	-1.26239	0.00646565	Down	Tagln3
NM_031678.1	2.77285	1.47137	0.0349832	Up	Per2
NM_031696.1	0.23141	-2.11147	0.0218375	Down	Gpr88
NM_031699.2	0.279696	-1.83807	0.000882656	Down	Cldn1
NM_031701.2	0.478005	-1.0649	0.0142957	Down	Cldn5
NM_031713.1	20.7862	4.37756	0.0115575	Up	Pirb
NM_031716.1	5.00655	2.32382	0.0257093	Up	Wisp1
NM_031727.2	0.464697	-1.10564	0.0128823	Down	Limk1
NM_031730.2	0.411437	-1.28126	0.00650094	Down	Kcnd2
NM_031741.1	0.128774	-2.95709	1.97e-06	Down	Slc2a5
NM_031743.2	0.381454	-1.39042	0.00222924	Down	Slc24a2
NM_031771.2	13.1547	3.71751	0.000455516	Up	Thbd
NM_031773.1	3.05963	1.61336	0.00659481	Up	Polr1b
NM_031776.2	7.15259	2.83847	0.0198733	Up	Gda
NM_031778.2	0.454296	-1.13829	0.0221207	Down	Kcns3
NM_031780.1	0.476349	-1.06991	0.0222	Down	Apba2
NM_031782.1	0.424829	-1.23504	0.0160251	Down	Slc32a1
NM_031783.1	0.309008	-1.69428	0.000128784	Down	Nefl
NM_031787.1	0.071154	-3.81291	0.00247215	Down	Hipk3
[truncated: 4,708 more rows]
